# Supplementary material for: Synthesis of fused tetracyclic spiroindoles via palladium-catalysed cascade cyclisation
Source: Royal Society of Chemistry journal article supplement (doi:10.1039/c3cc46511j), 2013-10-28

## Supporting Information

### Synthesis of the Fused Tetracyclic Spiroindoles via Palladium-Catalysed Cascade Cyclisation

Iwata Akira, Shinsuke Inuki, Shinya Oishi, Nobutaka Fujii,\* and Hiroaki Ohno\*

*Graduate School of Pharmaceutical Sciences, Kyoto University, Sakyo-ku,  
Kyoto 606-8501, Japan*

*E-mail: hohno@pharm.kyoto-u.ac.jp; nfujii@pharm.kyoto-u.ac.jp*

#### Table of Contents

|                                           |    |
|-------------------------------------------|----|
| Optimization of Reaction Conditions ..... | 2  |
| Experimental Section .....                | 3  |
| NMR Spectra .....                         | 13 |

### Optimization of Reaction Conditions

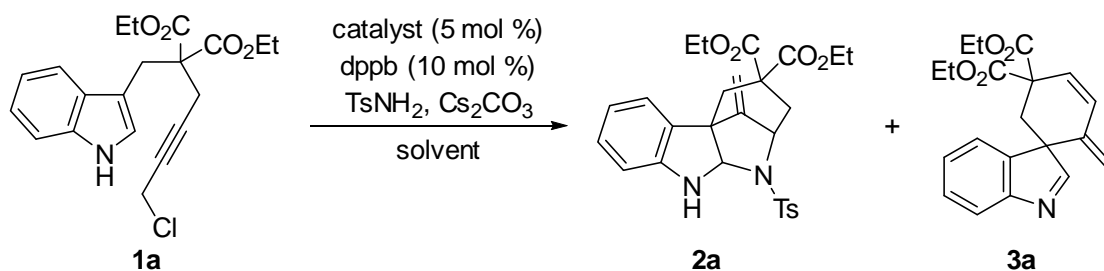

| entry | catalyst (mol %)                                            | TsNH <sub>2</sub> (equiv) | Cs <sub>2</sub> CO <sub>3</sub> (equiv) | solvent (M)              | temp. (°C) | yield (%) <sup>a</sup> |           |
|-------|-------------------------------------------------------------|---------------------------|-----------------------------------------|--------------------------|------------|------------------------|-----------|
|       |                                                             |                           |                                         |                          |            | <b>2a</b>              | <b>3a</b> |
| 1     | Pd(dba) <sub>2</sub> (5)                                    | TsNH <sub>2</sub> (1)     | Cs <sub>2</sub> CO <sub>3</sub> (2)     | THF (0.1)                | rt         | ca. 72                 | 3         |
| 2     | Pd(dba) <sub>2</sub> (5)                                    | TsNH <sub>2</sub> (1)     | Cs <sub>2</sub> CO <sub>3</sub> (2)     | dioxane (0.1)            | 70         | ca. 13                 | <1        |
| 3     | Pd(dba) <sub>2</sub> (5)                                    | TsNH <sub>2</sub> (1)     | Cs <sub>2</sub> CO <sub>3</sub> (2)     | DMF (0.1)                | rt         | ca. 59                 | <1        |
| 4     | Pd(dba) <sub>2</sub> (5)                                    | TsNH <sub>2</sub> (1)     | Cs <sub>2</sub> CO <sub>3</sub> (2)     | CH <sub>3</sub> CN (0.1) | 40         | ca. 54                 | -         |
| 5     | Pd(dba) <sub>2</sub> (2.5)                                  | TsNH <sub>2</sub> (1)     | Cs <sub>2</sub> CO <sub>3</sub> (2)     | THF (0.1)                | rt         | 37                     | <5        |
| 6     | Pd <sub>2</sub> (dba) <sub>3</sub> ·CHCl <sub>3</sub> (2.5) | TsNH <sub>2</sub> (1)     | Cs <sub>2</sub> CO <sub>3</sub> (2)     | THF (0.1)                | rt         | 59                     | 7         |
| 7     | Pd <sub>2</sub> (dba) <sub>3</sub> ·CHCl <sub>3</sub> (2.5) | TsNH <sub>2</sub> (1.5)   | Cs <sub>2</sub> CO <sub>3</sub> (2)     | THF (0.1)                | rt         | 68                     | 4         |
| 8     | Pd <sub>2</sub> (dba) <sub>3</sub> ·CHCl <sub>3</sub> (2.5) | TsNH <sub>2</sub> (1.5)   | Cs <sub>2</sub> CO <sub>3</sub> (1)     | THF (0.1)                | rt         | 69                     | 5         |
| 9     | Pd <sub>2</sub> (dba) <sub>3</sub> ·CHCl <sub>3</sub> (2.5) | TsNH <sub>2</sub> (1.5)   | Cs <sub>2</sub> CO <sub>3</sub> (2)     | THF (0.067)              | rt         | 72                     | 5         |
| 10    | Pd <sub>2</sub> (dba) <sub>3</sub> ·CHCl <sub>3</sub> (2.5) | TsNH <sub>2</sub> (1.5)   | Cs <sub>2</sub> CO <sub>3</sub> (1)     | THF (0.067)              | rt         | 61                     | 9         |

<sup>a</sup> Isolated yields.

## Experimental Section

### General Methods.

All reactions under argon atmosphere were performed using syringe-septum cap techniques and all glassware was dried in an oven at 80 °C for 2 h prior to use. For flash chromatography, silica gel (Wakosil C-200: Wako Pure Chemical Industries, Ltd) or NH<sub>2</sub> silica gel (Chromatorex NH-DM1020: Fuji Silysia Chemical Ltd.) was employed. Thin layer chromatography was performed on Merck TLC silica gel 60 F<sub>254</sub> or Wako NH<sub>2</sub> silica gel 60 F<sub>254</sub> plate (layer thickness 0.25 mm), which were developed using standard visualizing agents: UV fluorescence (254 nm) and anisaldehyde with heating. Melting points were measured by a hot stage melting point apparatus (uncorrected). <sup>1</sup>H NMR spectra were recorded using a JEOL AL-400 or JEOL ECA-500 spectrometer, and chemical shifts are reported in δ (ppm) relative to TMS as internal standard. <sup>13</sup>C NMR spectra were recorded using a JEOL AL-400 or JEOL ECA-500 spectrometer and referenced to the residual solvent signal. <sup>1</sup>H NMR spectra are tabulated as follows: chemical shift, multiplicity (b = broad, s = singlet, d = doublet, t = triplet, q = quartet, m = multiplet), number of protons, and coupling constant(s). Exact mass (HRMS) spectra were recorded on a JMS-HX/HX 110A mass spectrometer. Infrared (IR) spectra were obtained on a JASCO FT/IR-4100 FT-IR spectrometer with JASCO ATR PRO410-S.

### Preparation of the Substrates.

The known compounds **S1**,<sup>1</sup> **S6-8**<sup>2</sup> and **S9**<sup>3</sup> were prepared according to the literature procedure.

- 1 Jones, D. T.; Artman, G. D.; Williams, R. M. *Tetrahedron Lett.* **2007**, *48*, 1291–1294.
- 2 Cera, G.; Crispino, P.; Monari, M.; Bandini, M. *Chem. Commun.* **2011**, *47*, 7803–7805.
- 3 Miyake, Y.; Endo, S.; Moriyama, T.; Sakata, K.; Nishibayashi, Y. *Angew. Chem. Int. Ed.* **2013**, *52*, 1758–1762.

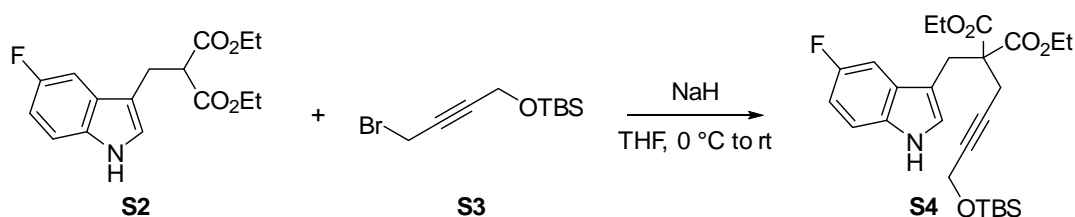

### Diethyl 2-[(5-Fluoro-1H-indol-3-yl)methyl]malonate (**S2**).

The malonate **S2** was prepared by use of a slight modification of the Williams' procedure.<sup>1</sup> To a stirred mixture of **S1** (1.0 g, 5.20 mmol) and diethyl malonate (736 μL, 4.85 mmol) in Et<sub>2</sub>O (2.6 mL) was added dropwise ethylpropiolate (529 μL, 5.20 mmol) at room temperature. The mixture was stirred for 45 min at this temperature, followed by quenching with H<sub>2</sub>O. The whole was extracted with Et<sub>2</sub>O. The extract was washed successively with H<sub>2</sub>O and brine, and dried over MgSO<sub>4</sub>. The filtrate was concentrated under reduced pressure to give an oily residue, which was purified by flash chromatography over silica gel with *n*-hexane–EtOAc (8:1) to give **S2** as a pale yellow needle (1.27 g, 77% yield): mp 60–61 °C; IR (neat): 3410 (NH), 1726 (C=O); <sup>1</sup>H NMR (500 MHz, CDCl<sub>3</sub>) δ 1.21 (t, *J* = 7.2 Hz, 6H), 3.33 (d, *J* = 7.7 Hz, 2H), 3.72 (t, *J* = 7.7 Hz, 1H), 4.12–4.20 (m, 4H), 6.93 (ddd, *J* = 9.2, 9.2, 2.5 Hz, 1H), 7.09 (d, *J* = 2.3 Hz, 1H), 7.23–7.26 (m, 2H), 8.00 (br s, 1H); <sup>13</sup>C NMR (125 MHz, CDCl<sub>3</sub>) δ 13.9 (2C), 24.4, 52.9, 61.4 (2C), 103.5 (d, *J* = 24.0 Hz), 110.4 (d, *J* = 26.4 Hz), 111.8 (d, *J* = 9.6 Hz), 112.3 (d, *J* = 4.8 Hz) 124.4,

127.5 (d,  $J = 9.6$  Hz), 132.6, 157.8 (d,  $J = 235$  Hz), 169.2 (2C). *Anal.* Calcd for  $C_{16}H_{18}FNO_4$ : C, 62.53; H, 5.90; N, 4.56. Found: C, 62.41; H, 5.93; N, 4.50.

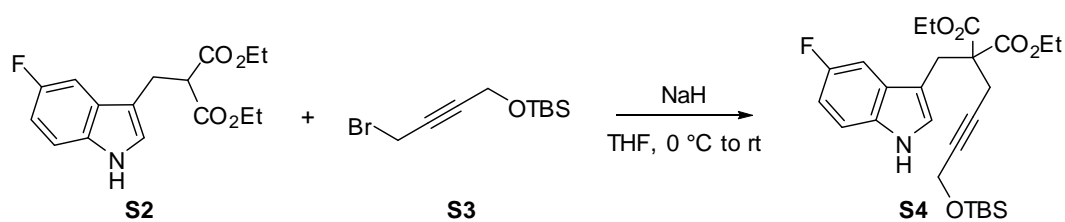

#### Diethyl 2-[(4-[(*tert*-Butyldimethylsilyl)oxy]but-2-yn-1-yl)-2-[(5-fluoro-1H-indol-3-yl)methyl]malonate (**S4**).

To a solution of **S2** (1.14 g, 3.71 mmol) in THF was added NaH (60% suspension in mineral oil; 297 mg, 7.42 mmol) at 0 °C. The suspension was stirred for 30 min at 0 °C, then **S3** (1.17 g, 4.45) in THF was added dropwise. The reaction was warmed up to room temperature and stirred for 2 h, followed by quenching with H<sub>2</sub>O. The whole was extracted with EtOAc. The extract was washed successively with H<sub>2</sub>O and brine, and dried over MgSO<sub>4</sub>. The filtrate was concentrated under reduced pressure to give an oily residue, which was purified by flash chromatography over silica gel with *n*-hexane–EtOAc (5:1) to give **S4** as a colorless oil (682 mg, 38%): IR (neat): 3387 (NH), 2332 (C≡C), 1736 (C=O); <sup>1</sup>H NMR (500 MHz, CDCl<sub>3</sub>)  $\delta$  0.14 (s, 6H), 0.92 (s, 9H), 1.23 (t,  $J = 7.0$  Hz, 6H), 2.81 (t,  $J = 2.1$  Hz, 2H), 3.51 (s, 2H), 4.10–4.22 (m, 4H), 4.37 (t,  $J = 2.1$  Hz, 2H), 6.90 (ddd,  $J = 9.0, 9.0, 2.5$  Hz, 1H), 7.09 (d,  $J = 2.4$  Hz, 1H), 7.21 (dd,  $J = 9.0, 4.3$  Hz, 1H), 7.29 (dd,  $J = 9.9, 2.5$  Hz, 1H), 8.12 (br s, 1H); <sup>13</sup>C NMR (125 MHz, CDCl<sub>3</sub>)  $\delta$  -5.2 (2C), 13.9 (2C), 18.3, 23.1, 25.8 (3C), 27.3, 51.8, 58.0, 61.6 (2C), 80.2, 82.4, 103.8 (d,  $J = 24.0$  Hz), 110.0 (d,  $J = 4.8$  Hz), 110.4 (d,  $J = 26.4$  Hz), 111.6 (d,  $J = 9.6$  Hz), 125.3, 128.5 (d,  $J = 9.6$  Hz), 132.3, 157.9 (d,  $J = 234$  Hz), 170.1 (2C). HRMS (FAB) calcd  $C_{26}H_{36}FNO_5Si$ : [ $M^+$ ], 489.2347; found: [ $M^+$ ], 489.2350.

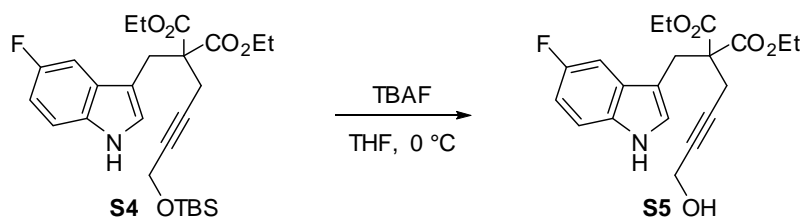

#### Diethyl 2-[(5-Fluoro-1H-indol-3-yl)methyl]-2-(4-hydroxybut-2yn-1-yl)malonate (**S5**).

To a stirred solution of **S4** (638 mg, 1.30 mmol) in THF (6.5 mL) was added TBAF (1.00 M solution in THF; 1.43 mL, 1.43 mmol) at 0 °C. The mixture was stirred for 1.5 h at this temperature and quenched by addition of saturated NH<sub>4</sub>Cl. The whole was extracted with EtOAc. The extract was washed with H<sub>2</sub>O and brine, and dried over MgSO<sub>4</sub>. The filtrate was concentrated under reduced pressure to give an oily residue, which was purified by flash chromatography over silica gel with *n*-hexane–EtOAc (3:1) to give **S5** as a pale yellow oil (485 mg, 99% yield): IR (neat): 3410 (NH), 3403 (OH), 2254 (C≡C), 1720 (C=O); <sup>1</sup>H NMR (500 MHz, CDCl<sub>3</sub>)  $\delta$  1.24 (t,  $J = 7.2$  Hz, 6H), 1.97 (s, 1H), 2.80 (s, 2H), 3.51 (s, 2H), 4.11–4.25 (m, 4H), 4.31 (s, 2H), 6.90 (ddd,  $J = 8.9, 8.9, 2.5$  Hz, 1H), 7.08 (d,  $J = 2.3$  Hz, 1H), 7.22 (dd,  $J = 8.9, 4.4$  Hz, 1H), 7.29 (dd,  $J = 10.0, 2.5$  Hz, 1H), 8.19 (br s, 1H); <sup>13</sup>C NMR (125 MHz, CDCl<sub>3</sub>)  $\delta$  13.9 (2C), 23.1, 27.3, 51.2, 58.0, 61.7 (2C), 81.4, 82.2, 103.7 (d,  $J = 23.0$  Hz), 109.7 (d,

$J = 4.8$  Hz), 110.4 (d,  $J = 25.9$  Hz), 111.7 (d,  $J = 10.5$  Hz), 125.4, 128.5 (d,  $J = 11.5$  Hz), 132.3, 157.9 (d,  $J = 235$  Hz), 170.2 (2C). HRMS (FAB) calcd  $C_{20}H_{22}FNO_5$ :  $[M]^+$ , 375.1482; found:  $[M]^+$ , 375.1478.

### General procedure for the synthesis of propargyl chloride 1a and 1f-h.

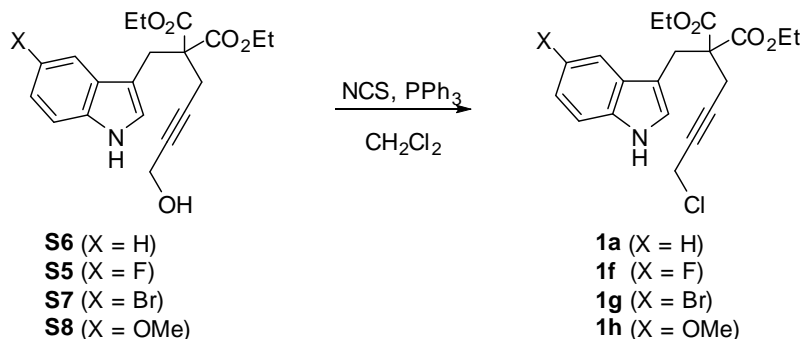

To a stirred mixture of a propargyl alcohol (1.0 equiv) and  $PPh_3$  (1.5 equiv) in  $CH_2Cl_2$  was added NCS (1.2 equiv) in  $CH_2Cl_2$  at room temperature. The mixture was stirred for 1.5–3 h at this temperature and quenched by addition of  $H_2O$ . The whole was extracted with EtOAc. The extract was washed with  $H_2O$ , brine and dried over  $MgSO_4$ . The filtrate was concentrated under reduced pressure to give an oily residue, which was purified by flash chromatography over silica gel to give the corresponding propargyl chloride.

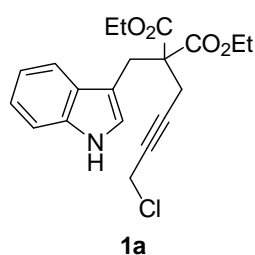

#### Diethyl 2-[(1H-Indol-3-yl)methyl]-2-(4-chlorobut-2-yn-1-yl)malonate (1a).

Brown oil. Flash chromatography: *n*-hexane–EtOAc = 4:1. Yield = 90%.

IR (neat): 3409 (NH), 2242 ( $C\equiv C$ ), 1729 ( $C=O$ );  $^1H$  NMR (500 MHz,  $CDCl_3$ )  $\delta$  1.23 (t,  $J = 7.3$  Hz, 6H), 2.83 (t,  $J = 2.2$  Hz, 2H), 3.57 (s, 2H), 4.10–4.25 (m, 6H), 7.03 (d,  $J = 2.4$  Hz, 1H), 7.09 (ddd,  $J = 8.0, 7.1, 1.0$  Hz, 1H), 7.16 (ddd,  $J = 8.0, 7.1, 1.0$  Hz, 1H), 7.32 (dd,  $J = 8.0, 1.0$  Hz, 1H), 7.66 (dd,  $J = 8.0, 1.0$  Hz, 1H), 8.08 (br s, 1H);  $^{13}C$  NMR (125 MHz,  $CDCl_3$ )  $\delta$  14.0 (2C), 23.1, 27.3, 30.8, 58.2, 61.7 (2C), 78.3, 82.9, 109.6, 111.0, 118.9, 119.5, 122.0, 123.4, 128.1,

135.8, 170.1 (2C). HRMS (FAB) calcd  $C_{20}H_{21}ClNO_4$ :  $[M - H]^-$ , 374.1165; found:  $[M - H]^-$ , 374.1168.

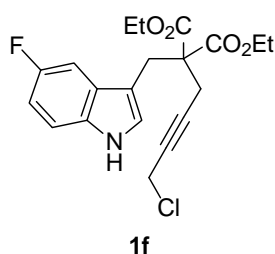

#### Diethyl 2-(4-Chlorobut-2-yn-1-yl)-2-[(5-fluoro-1H-indol-3-yl)methyl]malonate (1f).

Brown oil. Flash chromatography: *n*-hexane–EtOAc = 5:1. Yield = 87%.

IR (neat): 3407 (NH), 2238 ( $C\equiv C$ ), 1727 ( $C=O$ );  $^1H$  NMR (500 MHz,  $CDCl_3$ )  $\delta$  1.25 (t,  $J = 7.4$  Hz, 6H), 2.82 (t,  $J = 2.3$  Hz, 2H), 3.51 (s, 2H), 4.13–4.24 (m, 6H), 6.90 (ddd,  $J = 9.0, 9.0, 2.5$  Hz, 1H), 7.07 (d,  $J = 2.3$  Hz, 1H), 7.21 (dd,  $J = 9.0, 4.3$  Hz, 1H), 7.29 (dd,  $J = 9.0, 2.5$  Hz, 1H), 8.17 (br s, 1H);  $^{13}C$  NMR (125 MHz,  $CDCl_3$ )  $\delta$  13.9 (2C), 23.1, 27.4,

30.7, 58.0, 61.8 (2C), 78.6, 82.7, 103.8 (d,  $J = 24.0$  Hz), 109.7 (d,  $J = 4.8$  Hz), 110.5 (d,  $J = 26.4$  Hz), 111.7 (d,  $J = 9.6$  Hz), 125.3, 128.5 (d,  $J = 9.6$  Hz), 132.3, 157.9 (d,  $J = 235$  Hz), 170.0 (2C). HRMS (FAB) calcd  $C_{20}H_{21}ClFNO_4$ :  $[M]^+$ , 393.1143; found:  $[M]^+$ , 393.1147.

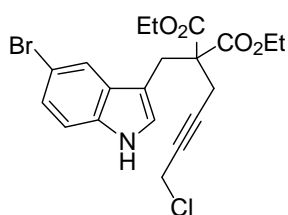

**1g**

**Diethyl 2-[(5-Bromo-1H-indol-3-yl)methyl]-2-(4-chlorobut-2-yn-1-yl)malonate (1g).**

Brown oil. Flash chromatography: *n*-hexane–EtOAc = 4:1. Yield = 73%.

IR (neat): 3384 (NH), 2238 (C≡C), 1727 (C=O); <sup>1</sup>H NMR (500 MHz, CDCl<sub>3</sub>) δ 1.27 (t, *J* = 7.2 Hz, 6H), 2.80 (t, *J* = 2.3 Hz, 2H), 3.52 (s, 2H), 4.15–4.25 (m, 6H), 7.06 (d, *J* = 2.4 Hz, 1H), 7.18 (d, *J* = 8.6 Hz, 1H), 7.23 (dd, *J* = 8.6, 1.9 Hz, 1H), 7.75 (d, *J* = 1.9 Hz, 1H), 8.17 (br s, 1H); <sup>13</sup>C NMR (125 MHz, CDCl<sub>3</sub>) δ 14.0 (2C), 23.1, 27.2, 30.7, 57.8,

61.9 (2C), 78.7, 82.6, 109.3, 112.5, 112.9, 121.5, 124.8, 124.9, 129.7, 134.4, 169.9 (2C). HRMS (FAB) calcd C<sub>20</sub>H<sub>21</sub>BrClNO<sub>4</sub>: [M<sup>+</sup>], 453.0342; found: [M<sup>+</sup>], 453.0345.

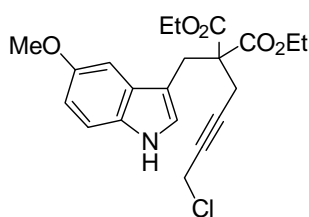

**1h**

**Diethyl 2-(4-Chlorobut-2-yn-1-yl)-2-[(5-methoxy-1H-indol-3-yl)methyl]malonate (1h).**

Brown oil. Flash chromatography: *n*-hexane–EtOAc = 4:1. Yield = 70%.

IR (neat): 3417 (NH), 2239 (C≡C), 1732 (C=O); <sup>1</sup>H NMR (500 MHz, CDCl<sub>3</sub>) δ 1.23 (t, *J* = 7.0 Hz, 6H), 2.85 (t, *J* = 2.0 Hz, 2H), 3.53 (s, 2H), 3.86 (s, 3H), 4.14–4.24 (m, 6H), 6.83 (dd, *J* = 8.9, 2.5 Hz, 1H), 6.97 (d, *J* = 2.5 Hz, 1H), 7.15 (d, *J* = 2.5 Hz, 1H),

7.20 (d, *J* = 8.9 Hz, 1H), 8.00 (br s, 1H); <sup>13</sup>C NMR (125 MHz, CDCl<sub>3</sub>) δ 14.0 (2C), 23.1, 27.4, 30.7, 55.9, 58.5, 61.7 (2C), 78.3, 83.1, 100.5, 109.4, 111.8, 112.6, 124.1, 128.6, 131.0, 154.2, 170.0 (2C). HRMS (FAB) calcd C<sub>21</sub>H<sub>24</sub>ClNO<sub>5</sub>: [M<sup>+</sup>], 405.1343; found: [M<sup>+</sup>], 405.1345.

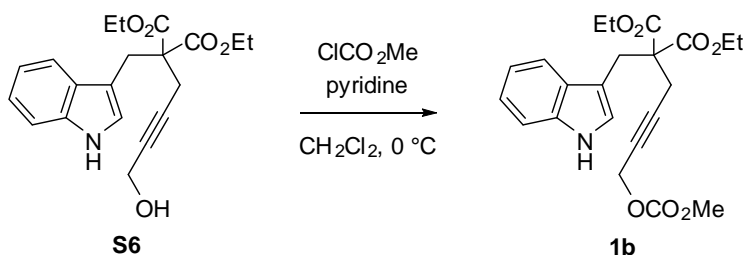

**S6**

**1b**

**Diethyl 2-[(1H-Indol-3-yl)methyl]-2-[4-[(methoxycarbonyl)oxy]but-2-yn-1-yl]malonate (1b).**

To a stirred mixture of **S6** (50 mg, 0.135 mmol), pyridine (33 μL, 0.41 mmol) in CH<sub>2</sub>Cl<sub>2</sub> (675 μL) was added ClCO<sub>2</sub>Me (14 μL, 0.20 mmol) at 0 °C. The mixture was stirred for 30 min at this temperature and quenched by addition of saturated NH<sub>4</sub>Cl. The whole was extracted with Et<sub>2</sub>O. The extract was washed with H<sub>2</sub>O, 1N HCl, brine and dried over MgSO<sub>4</sub>. The filtrate was concentrated under reduced pressure to give an oily residue, which was purified by flash chromatography over silica gel with *n*-hexane–EtOAc (4:1) to give **1b** as a brown oil (47.5 mg, 82% yield): IR (neat): 3407 (NH), 2252 (C≡C), 1731 (C=O); <sup>1</sup>H NMR (500 MHz, CDCl<sub>3</sub>) δ 1.22 (t, *J* = 6.8 Hz, 6H), 2.82 (t, *J* = 2.3 Hz, 2H), 3.56 (s, 2H), 3.82 (s, 3H), 4.10–4.23 (m, 4H), 4.78 (t, *J* = 2.3 Hz, 2H), 7.01 (d, *J* = 2.3 Hz, 1H), 7.09 (ddd, *J* = 8.0, 8.0, 1.0 Hz, 1H), 7.15 (ddd, *J* = 8.0, 8.0, 1.0 Hz, 1H), 7.31 (d, *J* = 8.0 Hz, 1H), 7.63 (d, *J* = 8.0 Hz, 1H), 8.14 (br s, 1H); <sup>13</sup>C NMR (125 MHz, CDCl<sub>3</sub>) δ 13.9 (2C), 23.0, 27.3, 55.1, 55.9, 58.1, 61.6 (2C), 77.3, 83.7, 109.5, 110.0, 118.8, 119.4, 122.0, 123.5, 128.1, 135.8, 155.2, 170.0 (2C). HRMS (FAB) calcd C<sub>22</sub>H<sub>25</sub>NO<sub>7</sub>: [M – H]<sup>–</sup>, 414.1558; found: [M – H]<sup>–</sup>, 414.1564.

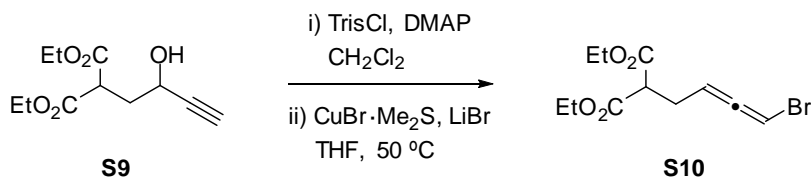

### Diethyl 2-(4-Bromobuta-2,3-dien-1-yl)malonate (**S10**)

To a stirred mixture of **S9** (410 mg, 1.8 mmol) and TrisCl (1.36 g, 4.5 mmol) in CH<sub>2</sub>Cl<sub>2</sub> (41 mL) was added DMAP (770 mg, 6.3 mmol) at room temperature. The mixture was stirred for 3 h at this temperature. Concentration of the mixture under reduced pressure followed by rapid filtration through a short pad of silica gel with Et<sub>2</sub>O to give a crude sulfonate, which was used without further purification. CuBr·Me<sub>2</sub>S (1.10 g, 5.4 mmol) and LiBr (465 mg, 0.373 mmol) was dissolved in THF (18 mL) at room temperature under argon, and the mixture was stirred for 30 min at this temperature. To this mixture was added a solution of the above crude sulfonate in THF (26 mL) at room temperature. The mixture was allowed to warm to 50 °C and stirred at this temperature for 1.5 h, which was quenched by addition of saturated NH<sub>4</sub>Cl and 28% NH<sub>4</sub>OH. The whole was extracted with EtOAc. The extract was washed with H<sub>2</sub>O and brine and dried over MgSO<sub>4</sub>. The filtrate was concentrated under reduced pressure to give an oily residue, which was purified by flash chromatography over silica gel with *n*-hexane–EtOAc (30:1) to give **S10** as a colorless oil (330 mg, 63% yield): IR (neat): 1958 (C=C=C), 1732 (C=O); <sup>1</sup>H NMR (500 MHz, CDCl<sub>3</sub>) δ 1.26-1.31 (m, 6H), 2.73-2.78 (m, 2H), 3.52 (t, *J* = 7.4 Hz, 1H), 4.18-4.27 (m, 4H), 5.45 (dd, *J* = 12.6, 5.7 Hz, 1H), 6.00 (ddd, *J* = 5.7, 2.4, 2.4 Hz, 1H); <sup>13</sup>C NMR (125 MHz, CDCl<sub>3</sub>) δ 14.0 (2C), 21.2, 50.8, 61.7 (2C), 73.7, 97.3, 168.4, 168.5, 202.3; HRMS (FAB) calcd C<sub>11</sub>H<sub>16</sub>BrNO<sub>4</sub>: [M + H]<sup>+</sup>, 291.0232; found: [M + H]<sup>+</sup>, 291.0227.

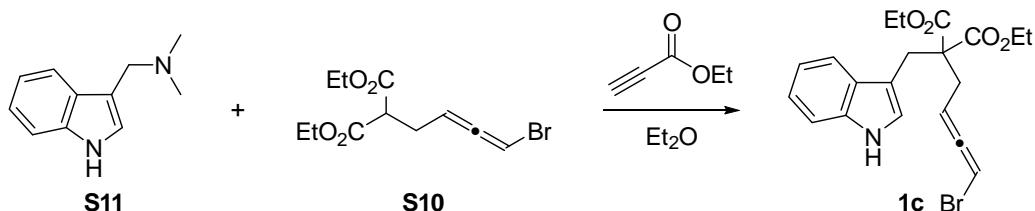

### Diethyl 2-(4-Bromobuta-2,3-dien-1-yl)-2-[(1*H*-indol-3-yl)methyl]malonate (**1c**).

To a stirred mixture of **S11** (286 mg, 1.13 mmol) and **S10** (306 mg, 1.05 mmol) in Et<sub>2</sub>O (1.1 mL) was added dropwise ethyl propiolate (115 μL, 1.13 mmol) at room temperature. The mixture was stirred for 5 h at this temperature, followed by quenching with H<sub>2</sub>O. The whole was extracted with EtOAc. The extract was washed successively with H<sub>2</sub>O and brine, and dried over MgSO<sub>4</sub>. The filtrate was concentrated under reduced pressure to give an oily residue, which was purified by flash chromatography over silica gel with *n*-hexane–EtOAc (8:1 to 5:1) to give **1c** as a brown oil (285 mg, 64% yield): IR (neat): 3393 (NH), 1957 (C=C=C), 1720 (C=O); <sup>1</sup>H NMR (400 MHz, CDCl<sub>3</sub>) δ 1.18-1.24 (m, 6H), 2.75-2.77 (m, 2H), 3.42-3.52 (m, 2H), 4.10-4.22 (m, 4H), 5.34-5.41 (m, 1H), 5.92-5.97 (m, 1H), 7.03 (d, *J* = 2.3 Hz, 1H), 7.10 (dd, *J* = 8.0, 8.0 Hz, 1H), 7.17 (dd, *J* = 8.0, 8.0 Hz, 1H), 7.33 (d, *J* = 8.0 Hz, 1H), 7.56 (d, *J* = 8.0 Hz, 1H), 8.05 (br s, 1H); <sup>13</sup>C NMR (125 MHz, CDCl<sub>3</sub>) δ 13.9 (2C), 28.0, 31.9, 58.6, 61.5 (2C), 72.4, 95.7, 109.5, 111.1, 118.7, 119.4, 121.9, 123.4, 128.0, 135.7, 170.7 (2C), 203.6. HRMS (FAB) calcd C<sub>20</sub>H<sub>22</sub>BrNO<sub>4</sub>: [M]<sup>+</sup>, 419.0732; found: [M]<sup>+</sup>, 419.0724.

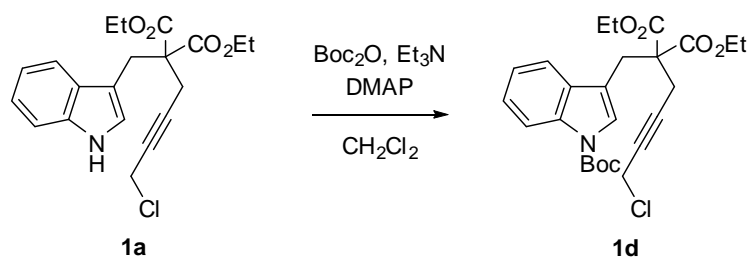

**Diethyl 2-[[1-(*tert*-Butoxycarbonyl)-1*H*-indol-3-yl]methyl]-2-(4-chlorobut-2-yn-1-yl)malonate (**1d**).**

To a stirred mixture of **1a** (100 mg, 0.27 mmol), DMAP (3.2 mg, 0.027 mmol) and  $\text{Et}_3\text{N}$  (46  $\mu\text{L}$ , 0.32 mmol) in  $\text{CH}_2\text{Cl}_2$  (2.6 mL) was added  $\text{Boc}_2\text{O}$  (70 mg, 0.32 mmol) at room temperature. The mixture was stirred for 30 min at this temperature and quenched by addition of  $\text{H}_2\text{O}$ . The whole was extracted with EtOAc. The extract was washed with  $\text{H}_2\text{O}$ , brine and dried over  $\text{MgSO}_4$ . The filtrate was concentrated under reduced pressure to give an oily residue, which was purified by flash chromatography over silica gel with *n*-hexane–EtOAc (10:1) to give **1d** as a colorless oil (91.0 mg, 72% yield): IR (neat): 1733 (C=O);  $^1\text{H}$  NMR (500 MHz,  $\text{CDCl}_3$ )  $\delta$  1.26 (t,  $J = 7.3$  Hz, 6H), 1.66 (s, 9H), 2.83 (t,  $J = 2.2$  Hz, 2H), 3.49 (s, 2H), 4.14–4.25 (m, 6H), 7.22 (ddd,  $J = 7.6, 7.6, 1.0$  Hz, 1H), 7.29 (ddd,  $J = 7.6, 7.6, 1.0$  Hz, 1H), 7.41 (s, 1H), 7.63 (dd,  $J = 7.6, 1.0$  Hz, 1H), 8.05–8.14 (br m, 1H);  $^{13}\text{C}$  NMR (125 MHz,  $\text{CDCl}_3$ )  $\delta$  14.0 (2C), 23.2, 26.9, 28.2 (3C), 30.7, 57.9, 61.9 (2C), 78.7, 82.6, 83.7, 114.4, 115.2, 119.1, 122.5, 124.4, 124.9, 131.0, 135.1, 149.6, 169.7 (2C). HRMS (FAB) calcd  $\text{C}_{25}\text{H}_{30}\text{ClNO}_6$ :  $[\text{M}^+]$ , 475.1762; found:  $[\text{M}^+]$ , 475.1758.

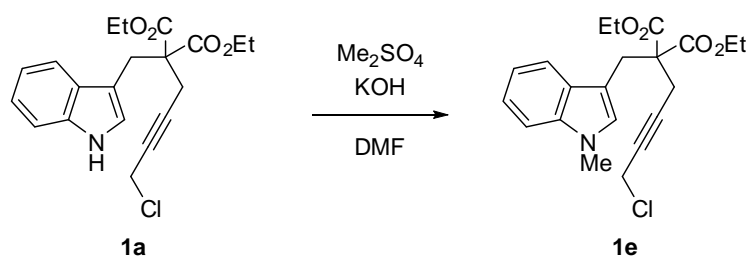

**Diethyl 2-(4-Chlorobut-2-yn-1-yl)-2-[(1-methyl-1*H*-indol-3-yl)methyl]malonate (**1e**).**

To a stirred mixture of **1a** (183 mg, 0.49 mmol) and KOH (64 mg, 0.97 mmol) in DMF (4.8 mL) was added  $\text{Me}_2\text{SO}_4$  (92  $\mu\text{L}$ , 0.32 mmol) at room temperature. The mixture was stirred for 3.5 h at this temperature and quenched by addition of  $\text{H}_2\text{O}$ . The whole was extracted with EtOAc. The extract was washed with  $\text{H}_2\text{O}$ , brine and dried over  $\text{MgSO}_4$ . The filtrate was concentrated under reduced pressure to give an oily residue, which was purified by flash chromatography over silica gel with *n*-hexane–EtOAc (6:1) to give **1e** as a pale yellow oil (100 mg, 53% yield): IR (neat): 2252 (C $\equiv$ C), 1735 (C=O);  $^1\text{H}$  NMR (500 MHz,  $\text{CDCl}_3$ )  $\delta$  1.24 (t,  $J = 7.2$  Hz, 6H), 2.83 (t,  $J = 2.3$  Hz, 2H), 3.54 (s, 2H), 3.72 (s, 3H), 4.11–4.24 (m, 6H), 6.87 (s, 1H), 7.08 (ddd,  $J = 7.6, 7.6, 1.1$  Hz, 1H), 7.18 (ddd,  $J = 7.6, 7.6, 1.1$  Hz, 1H), 7.23–7.26 (m, 1H), 7.63 (d,  $J = 7.6$  Hz, 1H);  $^{13}\text{C}$  NMR (125 MHz,  $\text{CDCl}_3$ )  $\delta$  14.0 (2C), 23.1, 27.3, 30.8, 32.7, 58.2, 61.6 (2C), 78.2, 83.0, 107.8, 109.1, 118.9 (2C), 121.5, 128.1, 128.6, 136.6, 169.7 (2C). HRMS (FAB) calcd  $\text{C}_{21}\text{H}_{24}\text{ClNO}_4$ :  $[\text{M}^+]$ , 389.1394; found:  $[\text{M}^+]$ , 389.1390.



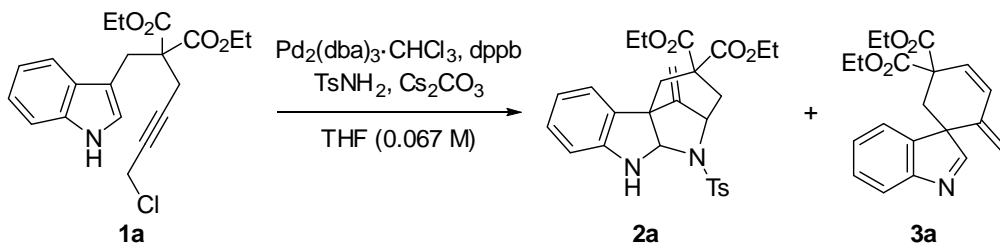

### General Procedure for the Palladium-Catalyzed Cascade Cyclization of Propargyl Chlorides.

To a stirred mixture of **1a** (30 mg, 0.080 mmol) and  $\text{TsNH}_2$  (20.5 mg, 0.16 mmol) were added  $\text{Pd}_2(\text{dba})_3 \cdot \text{CHCl}_3$  (2.1 mg, 3.9  $\mu\text{mol}$ , 2.5 mol %), dppf (3.4 mg, 8.0  $\mu\text{mol}$ , 10 mol %), and  $\text{Cs}_2\text{CO}_3$  (52 mg, 0.16 mmol) at room temperature under argon. The mixture was stirred for 3 h at this temperature, and  $\text{H}_2\text{O}$  was added to the mixture. The whole was extracted with EtOAc. The extract was washed with  $\text{H}_2\text{O}$ , brine and dried over  $\text{MgSO}_4$ . The filtrate was concentrated under reduced pressure to give an oily residue, which was purified by flash chromatography over  $\text{NH}_2$  silica gel with *n*-hexane–EtOAc (8:1) to give **2a** (29.3 mg, 72% yield) and **3a** (1.4 mg, 5.2% yield).

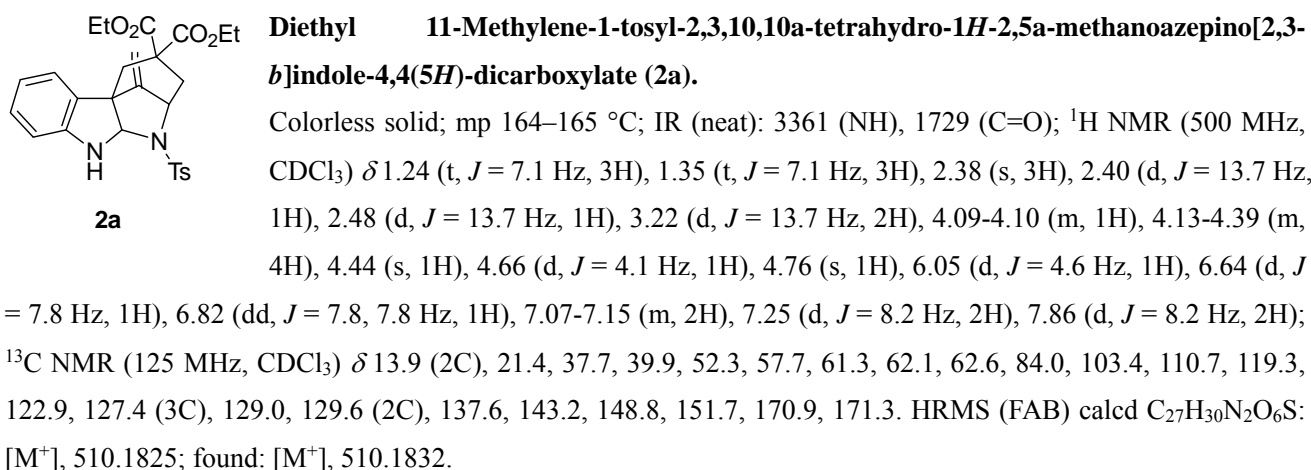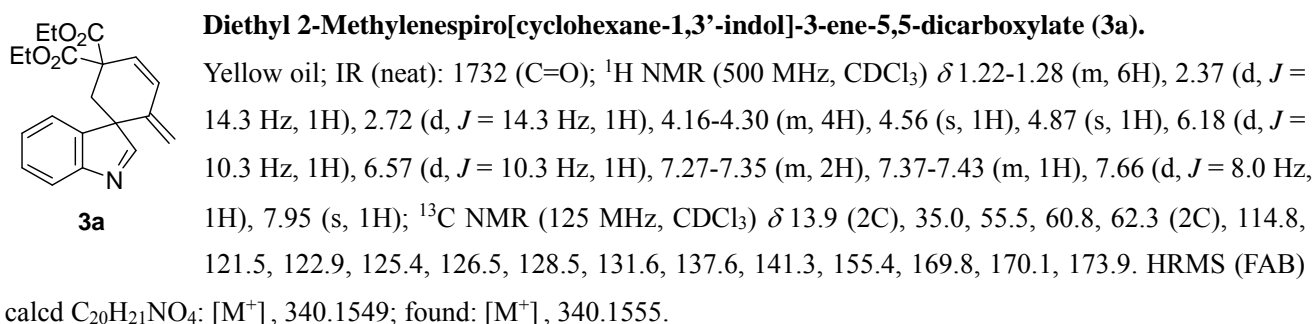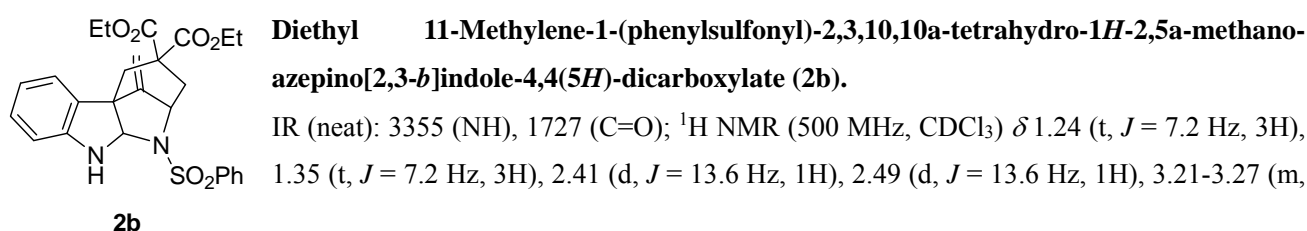

2H), 4.10-4.12 (m, 1H), 4.13-4.40 (m, 4H), 4.46 (s, 1H), 4.67 (d,  $J = 4.0$  Hz, 1H), 4.77 (s, 1H), 6.07 (d,  $J = 4.0$  Hz, 1H), 6.65 (d,  $J = 7.7$  Hz, 1H), 6.83 (dd,  $J = 7.7, 7.7$  Hz, 1H), 7.09 (d,  $J = 7.7$  Hz, 1H), 7.14 (dd,  $J = 7.7, 7.7$  Hz, 1H), 7.43-7.55 (m, 3H), 7.99 (d,  $J = 8.0$  Hz, 2H);  $^{13}\text{C}$  NMR (125 MHz,  $\text{CDCl}_3$ )  $\delta$  13.9 (2C), 37.7, 39.9, 52.3, 57.7, 61.3, 62.1, 62.6, 84.0, 103.6, 110.8, 119.4, 122.9, 127.3 (2C), 127.4, 128.9 (2C), 129.0, 132.5, 140.5, 148.8, 151.6, 170.9, 171.2. HRMS (FAB) calcd  $\text{C}_{26}\text{H}_{28}\text{N}_2\text{O}_6\text{S}$ :  $[\text{M}^+]$ , 496.1668; found:  $[\text{M}^+]$ , 496.1668.

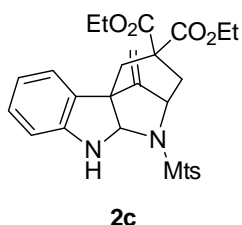

**Diethyl 1-(Mesitylsulfonyl)-11-methylene-2,3,10,10a-tetrahydro-1H-2,5a-methanoazepino[2,3-b]indole-4,4(5H)-dicarboxylate (2c).**

IR (neat): 3377 (NH), 1728 (C=O);  $^1\text{H}$  NMR (500 MHz,  $\text{CDCl}_3$ )  $\delta$  1.22-1.28 (m, 6H), 2.31 (s, 3H), 2.38 (d,  $J = 14.5$  Hz, 1H), 2.64 (s, 6H), 2.73 (dd,  $J = 13.7, 2.9$  Hz, 1H), 3.08 (dd,  $J = 14.5, 2.9$  Hz, 1H), 3.21 (d,  $J = 13.7$  Hz, 1H), 4.02 (d,  $J = 4.0$  Hz, 1H), 4.10-4.33 (m, 4H), 4.37 (t,  $J = 2.9$  Hz, 1H), 4.52 (s, 1H), 4.92 (s, 1H), 5.98 (d,  $J = 4.0$  Hz, 1H), 6.46 (d,  $J = 8.0$  Hz, 1H), 6.76 (dd,  $J = 8.0, 8.0$  Hz, 1H), 6.95 (s, 2H), 7.03-7.09 (m, 2H);  $^{13}\text{C}$  NMR (125 MHz,  $\text{CDCl}_3$ )  $\delta$  13.7, 13.9, 21.0, 23.1 (2C), 38.6, 39.4, 51.5, 58.0, 62.0, 62.3, 62.4, 82.8, 103.7, 109.9, 118.6, 122.8, 126.8, 128.9, 132.0 (2C), 133.9, 140.2 (2C), 142.6, 148.9, 151.4, 170.9, 171.5. HRMS (FAB) calcd  $\text{C}_{29}\text{H}_{34}\text{N}_2\text{O}_6\text{S}$ :  $[\text{M}^+]$ , 538.2138; found:  $[\text{M}^+]$ , 538.2142.

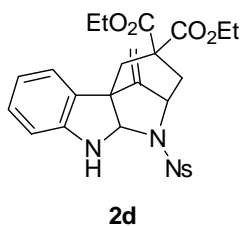

**Diethyl 11-Methylene-1-[(2-nitrophenyl)sulfonyl]-2,3,10,10a-tetrahydro-1H-2,5a-methanoazepino[2,3-b]indole-4,4(5H)-dicarboxylate (2d).**

The reaction was performed for 2 h at 60 °C.

IR (neat): 3372 (NH), 1728 (C=O);  $^1\text{H}$  NMR (500 MHz,  $\text{CDCl}_3$ )  $\delta$  1.24 (t,  $J = 7.2$  Hz, 3H), 1.31 (t,  $J = 7.2$  Hz, 3H), 2.46-2.51 (m, 2H), 3.23-3.32 (m, 2H), 4.10-4.40 (m, 5H), 4.57 (s, 1H), 4.66 (d,  $J = 4.6$  Hz, 1H), 4.95 (s, 1H), 6.07 (d,  $J = 4.6$  Hz, 1H), 6.63 (d,  $J = 8.0$  Hz, 1H), 6.86 (dd,  $J = 7.4, 7.4$  Hz, 1H), 7.12-7.17 (m, 2H), 7.59-7.71 (m, 3H), 8.18 (dd,  $J = 7.4, 1.7$  Hz, 1H);  $^{13}\text{C}$  NMR (125 MHz,  $\text{CDCl}_3$ )  $\delta$  13.8, 14.0, 37.8, 39.9, 52.3, 57.9, 62.3, 62.6, 62.8, 84.0, 104.3, 111.0, 119.8, 123.0, 124.4, 127.3, 129.1, 129.5, 132.1, 133.1, 134.6, 148.5, 148.9, 151.5, 170.8, 171.1. HRMS (FAB) calcd  $\text{C}_{26}\text{H}_{27}\text{N}_3\text{O}_8\text{S}$ :  $[\text{M}^+]$ , 541.1519; found:  $[\text{M}^+]$ , 541.1511.

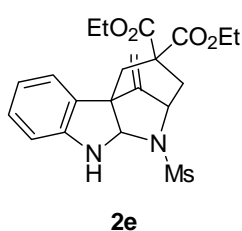

**Diethyl 11-Methylene-1-(methylsulfonyl)-2,3,10,10a-tetrahydro-1H-2,5a-methanoazepino[2,3-b]indole-4,4(5H)-dicarboxylate (2e).**

The reaction was performed for 24 h at 60 °C.

IR (neat): 3345 (NH), 1728 (C=O);  $^1\text{H}$  NMR (500 MHz,  $\text{CDCl}_3$ )  $\delta$  1.24 (t,  $J = 7.2$  Hz, 3H), 1.33 (t,  $J = 7.2$  Hz, 3H), 2.43-2.48 (m, 2H), 2.98 (s, 3H), 3.20-3.26 (m, 2H), 4.11-4.33 (m, 4H), 4.35-4.37 (m, 1H), 4.50 (s, 1H), 4.55 (d,  $J = 4.6$  Hz, 1H), 4.96 (s, 1H), 5.78 (d,  $J = 4.6$  Hz, 1H), 6.67 (d,  $J = 7.4$  Hz, 1H), 6.87 (dd,  $J = 7.4, 7.4$  Hz, 1H), 7.10-7.17 (m, 2H);  $^{13}\text{C}$  NMR (125 MHz,  $\text{CDCl}_3$ )  $\delta$  13.9, 14.0, 37.5, 40.5, 40.6, 52.6, 58.2, 61.8, 62.2, 62.6, 84.0, 103.4, 111.2, 119.8, 122.9, 127.8, 129.1, 148.6, 152.1, 170.7, 171.2. HRMS (FAB) calcd  $\text{C}_{21}\text{H}_{26}\text{N}_2\text{O}_6\text{S}$ :  $[\text{M}^+]$ , 434.1512; found:  $[\text{M}^+]$ , 434.1512.

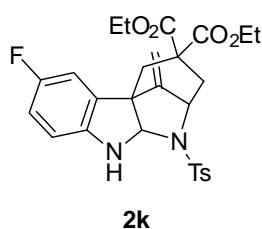

**2k**

**Diethyl 7-Fluoro-11-methylene-1-tosyl-2,3,10,10a-tetrahydro-1H-2,5a-methanoazepino[2,3-*b*]indole-4,4(5H)-dicarboxylate (2k).**

IR (neat): 3345 (NH), 1730 (C=O); <sup>1</sup>H NMR (500 MHz, CDCl<sub>3</sub>) δ 1.24 (t, *J* = 7.7 Hz, 3H), 1.35 (t, *J* = 7.7 Hz, 3H), 2.32 (d, *J* = 13.7 Hz, 1H), 2.39 (s, 3H), 2.48 (d, *J* = 14.9 Hz, 1H), 3.20-3.23 (m, 2H), 4.09-4.11 (m, 1H), 4.13-4.41 (m, 4H), 4.46 (s, 1H), 4.55 (d, *J* = 4.0 Hz, 1H), 4.79 (s, 1H), 6.07 (d, *J* = 4.6 Hz, 1H), 6.55 (dd, *J* = 8.0, 4.3 Hz, 1H), 6.80-6.86 (m, 2H), 7.25 (d, *J* = 8.0 Hz, 2H), 7.85 (d, *J* = 8.0 Hz, 2H); <sup>13</sup>C NMR (125 MHz, CDCl<sub>3</sub>) δ 13.8, 14.0, 21.5, 37.6, 39.9, 52.2, 57.7, 61.2, 62.2, 62.7, 84.4, 103.6, 110.6 (d, *J* = 22.8 Hz), 111.2 (d, *J* = 8.4 Hz), 115.1 (d, *J* = 25.2 Hz), 127.4 (2C), 128.9 (d, *J* = 10.8 Hz), 129.6 (2C), 137.5, 143.3, 144.7, 151.3, 157.1 (d, *J* = 243.5 Hz), 170.9, 171.11. HRMS (FAB) calcd C<sub>27</sub>H<sub>29</sub>FN<sub>2</sub>O<sub>6</sub>S: [M<sup>+</sup>], 528.1730; found: [M<sup>+</sup>], 528.1724.

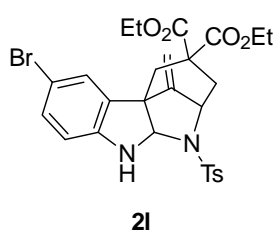

**2l**

**Diethyl 7-Bromo-11-methylene-1-tosyl-2,3,10,10a-tetrahydro-1H-2,5a-methanoazepino[2,3-*b*]indole-4,4(5H)-dicarboxylate (2l).**

The reaction was performed for 3 h at 60 °C.

IR (neat): 3364 (NH), 1730 (C=O); <sup>1</sup>H NMR (500 MHz, CDCl<sub>3</sub>) δ 1.25 (t, *J* = 7.2 Hz, 3H), 1.34 (t, *J* = 7.2 Hz, 3H), 2.32 (d, *J* = 13.7 Hz, 1H), 2.39 (s, 3H), 2.48 (d, *J* = 12.6 Hz, 1H), 3.17-3.23 (m, 2H), 4.10 (s, 1H), 4.12-4.38 (m, 4H), 4.49 (s, 1H), 4.65 (d, *J* = 4.6 Hz, 1H), 4.79 (s, 1H), 6.06 (d, *J* = 4.6 Hz, 1H), 6.52 (d, *J* = 8.3 Hz, 1H), 7.18 (d, *J* = 2.0 Hz, 1H), 7.23 (dd, *J* = 8.3, 2.0 Hz, 1H), 7.26 (d, *J* = 8.0 Hz, 2H), 7.83 (d, *J* = 8.0 Hz, 2H); <sup>13</sup>C NMR (125 MHz, CDCl<sub>3</sub>) δ 13.8, 14.0, 21.5, 37.5, 39.8, 52.2, 57.6, 61.2, 62.2, 62.6, 84.1, 103.7, 111.0, 119.3, 126.0, 127.3 (2C), 129.0, 129.6 (2C), 129.7, 137.4, 143.3, 147.9, 151.1, 170.8, 171.0. HRMS (FAB) calcd C<sub>27</sub>H<sub>29</sub>BrN<sub>2</sub>O<sub>6</sub>S: [M<sup>+</sup>], 588.0930; found: [M<sup>+</sup>], 588.0926.

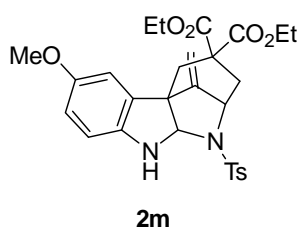

**2m**

**Diethyl 7-Methoxy-11-methylene-1-tosyl-2,3,10,10a-tetrahydro-1H-2,5a-methanoazepino[2,3-*b*]indole-4,4(5H)-dicarboxylate (2m).**

IR (neat): 3352 (NH), 1731 (C=O); <sup>1</sup>H NMR (500 MHz, CDCl<sub>3</sub>) δ 1.24 (t, *J* = 7.2 Hz, 3H), 1.35 (t, *J* = 7.2 Hz, 3H), 2.35 (d, *J* = 13.7 Hz, 1H), 2.38 (s, 3H), 2.46 (dd, *J* = 14.9, 1.7 Hz, 1H), 3.20-3.26 (m, 2H), 3.77 (s, 3H), 4.08-4.11 (m, 1H), 4.13-4.39 (m, 4H), 4.44 (d, *J* = 5.2 Hz, 1H), 4.47 (s, 1H), 4.77 (s, 1H), 6.03 (d, *J* = 5.2 Hz, 1H), 6.56 (d, *J* = 8.0 Hz, 1H), 6.67-6.71 (m, 2H), 7.25 (d, *J* = 8.0 Hz, 2H), 7.87 (d, *J* = 8.0 Hz, 2H); <sup>13</sup>C NMR (125 MHz, CDCl<sub>3</sub>) δ 13.9, 14.0, 21.5, 37.7, 40.0, 52.3, 56.0, 57.9, 61.3, 62.1, 62.6, 84.3, 103.4, 110.1, 111.2, 113.6, 127.4 (2C), 128.8, 129.6 (2C), 137.6, 142.4, 143.1, 151.6, 153.7, 170.9, 171.3. HRMS (FAB) calcd C<sub>28</sub>H<sub>32</sub>N<sub>2</sub>O<sub>7</sub>S: [M<sup>+</sup>], 540.1930; found: [M<sup>+</sup>], 540.1935.

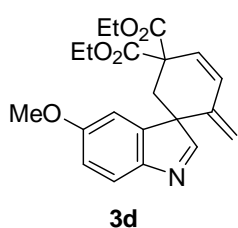

**3d**

**Diethyl 5'-Methoxy-2-methylenespiro[cyclohexane-1,3'-indol]-3-ene-5,5-dicarboxylate (3d).**

IR (neat): 1732 (C=O); <sup>1</sup>H NMR (500 MHz, CDCl<sub>3</sub>) δ 1.22-1.30 (m, 6H), 2.38 (d, *J* = 14.3 Hz, 1H), 2.68 (d, *J* = 14.3 Hz, 1H), 3.84 (s, 3H), 4.19-4.27 (m, 4H), 4.58 (s, 1H), 4.89 (s, 1H), 6.17 (d, *J* = 10.3 Hz, 1H), 6.56 (d, *J* = 10.3 Hz, 1H), 6.86 (d, *J* = 2.6 Hz, 1H), 6.90 (dd,

$J = 8.6, 2.6$  Hz, 1H), 7.56 (d,  $J = 8.6$  Hz, 1H), 7.82 (s, 1H);  $^{13}\text{C}$  NMR (125 MHz,  $\text{CDCl}_3$ )  $\delta$  13.9 (2C), 25.8, 35.2, 55.5, 55.7, 60.9, 62.3, 109.1, 113.6, 114.9, 121.9, 125.3, 131.6, 137.8, 143.0, 149.0, 158.9, 169.8, 170.1, 171.9. HRMS (FAB) calcd  $\text{C}_{21}\text{H}_{23}\text{NO}_5$ :  $[\text{M} + \text{H}]^+$ , 370.1654; found:  $[\text{M} + \text{H}]^+$ , 370.1653.

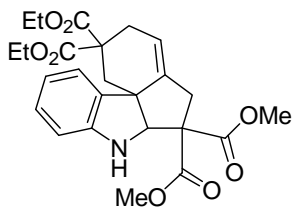

**4a**

**2,2-Dimethyl 6,6-Dimethyl 3,5,6a,7-Tetrahydro-1H-indeno[1,7a-b]indole-2,2,6,6-tetracarboxylate (4a).**

IR (neat): 1735 (C=O);  $^1\text{H}$  NMR (500 MHz,  $\text{CDCl}_3$ )  $\delta$  1.13 (t,  $J = 7.2$  Hz, 3H), 1.23-1.28 (m, 3H), 2.53 (d,  $J = 14.9$  Hz, 1H), 2.66-2.90 (m, 5H), 3.68 (s, 3H), 3.73 (s, 3H), 4.00-4.34 (m, 5H), 4.76 (s, 1H), 5.70-5.76 (m, 1H), 6.53 (d,  $J = 8.0$  Hz, 1H), 6.67 (dd,  $J = 8.0, 8.0$  Hz, 1H), 6.90 (d,  $J = 8.0$  Hz, 1H), 6.99 (dd,  $J = 8.0, 8.0$  Hz, 1H);  $^{13}\text{C}$  NMR (125 MHz,  $\text{CDCl}_3$ )  $\delta$  13.8, 13.9, 29.6, 29.7, 38.6, 39.9, 52.6, 52.9, 53.9, 54.7, 61.5, 65.6., 74.2, 109.4, 118.0, 119.4, 123.6, 128.2, 135.0, 140.9, 149.6, 169.3, 170.6, 171.0, 171.8. HRMS (FAB) calcd  $\text{C}_{25}\text{H}_{29}\text{NO}_8$ :  $[\text{M}^+]$ , 471.1893; found:  $[\text{M}^+]$ , 471.1901.

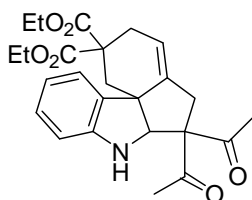

**4b**

**Diethyl 6,6-Diacetyl 5,6,6a,7-tetrahydro-1H-indeno[1,7a-b]indole-2,2(3H)-dicarboxylate (4b).**

IR (neat): 3406 (NH), 1728 (C=O);  $^1\text{H}$  NMR (500 MHz,  $\text{CDCl}_3$ )  $\delta$  1.15 (t,  $J = 7.1$  Hz, 3H), 1.25 (t,  $J = 7.1$  Hz, 3H), 2.01 (s, 3H), 2.18 (s, 3H), 2.37 (d,  $J = 14.7$  Hz, 1H), 2.64-2.73 (m, 3H), 2.84-2.91 (m, 2H), 4.04-4.20 (m, 4H), 4.43 (br s, 1H), 4.83 (s, 1H), 5.70-5.75 (m, 1H), 6.55 (d,  $J = 8.0$  Hz, 1H), 6.70 (dd,  $J = 8.0, 8.0$  Hz, 1H), 6.91 (dd,  $J = 8.0, 1.1$  Hz, 1H), 7.00 (ddd,  $J = 8.0, 8.0, 1.1$  Hz, 1H);  $^{13}\text{C}$  NMR (125 MHz,  $\text{CDCl}_3$ )  $\delta$  13.8, 13.9, 26.3, 28.8, 29.5, 36.3, 40.4, 54.2, 55.0, 61.6 (2C), 73.3., 79.5, 110.2, 117.6, 119.8, 123.4, 128.3, 136.0, 141.1, 149.4, 170.8, 171.7, 203.1, 204.8. HRMS (FAB) calcd  $\text{C}_{25}\text{H}_{29}\text{NO}_6$ :  $[\text{M}^+]$ , 439.1995; found:  $[\text{M}^+]$ , 439.2000.

C:\Documents and Settings\Hirota Kamitani\ff\X\Nfg\Bfv\jXsf\jC\*f\h [f<@~\*~\*\m.l,q\g\i\data-E-17\_Proton-1-1.als

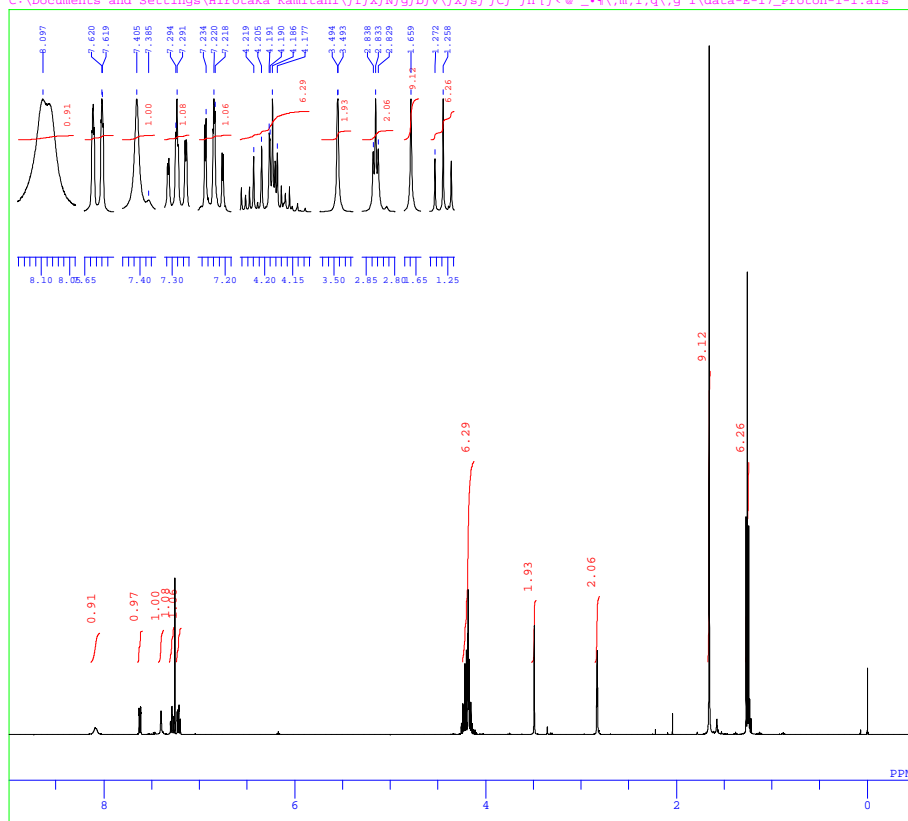

DFILE data-E-17\_Proton-1-1.als  
 COMNT single\_pulse  
 DATIM 2013-04-03 13:30:43  
 OBNUC 1H  
 EXMOD single\_pulse.ex2  
 OBFREQ 500.16 MHz  
 OBSET 2.41 KHz  
 OBFIN 6.01 Hz  
 POINT 52428  
 FREQU 7507.39 Hz  
 SCANS 8  
 ACQTM 6.9835 sec  
 PD 5.0000 sec  
 PW1 6.50 usec  
 IRNUC 1H  
 CTEMP 24.8 c  
 SLVNT CDCL3  
 EXREF 0.00 ppm  
 BF 0.12 Hz  
 RGAIN 40

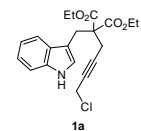

C:\Documents and Settings\Hirota Kamitani\ff\X\Nfg\Bfv\jXsf\jC\*f\h [f<@~\*~\*\m.l,q\g\i\data E-172 bcm-1.als

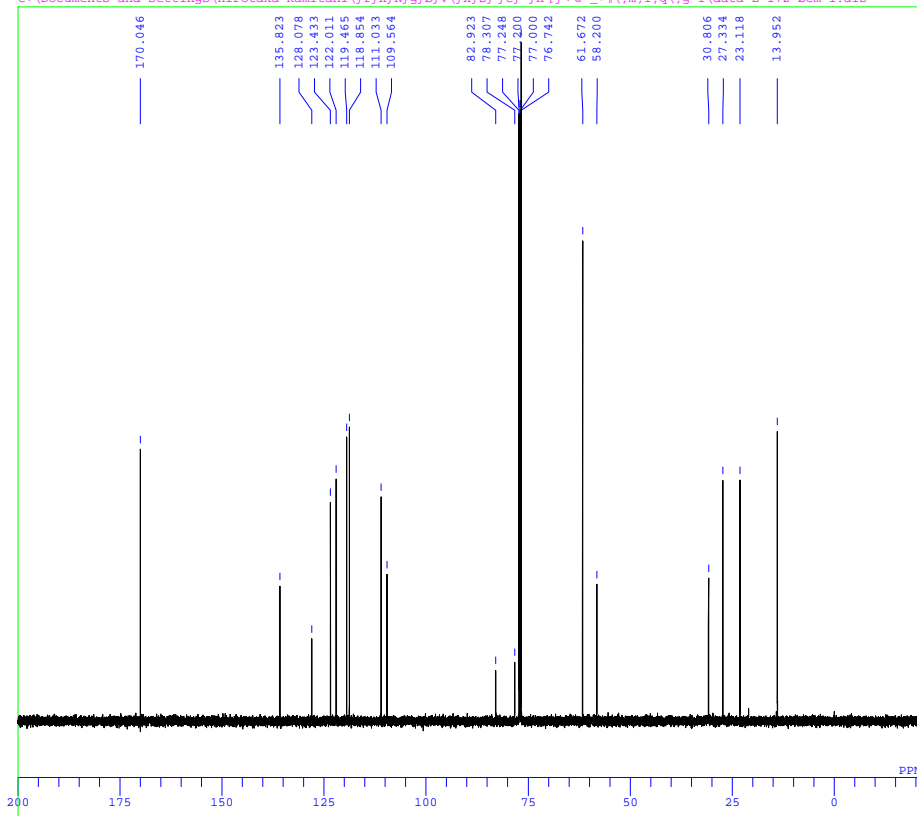

DFILE data E-172 bcm-1.als  
 COMNT single\_pulse decoupled gated NOE  
 DATIM 2013-04-02 15:41:46  
 OBNUC 13C  
 EXMOD single\_pulse\_dec  
 OBFREQ 125.77 MHz  
 OBSET 7.87 KHz  
 OBFIN 4.21 Hz  
 POINT 26214  
 FREQU 31446.06 Hz  
 SCANS 883  
 ACQTM 0.8336 sec  
 PD 2.0000 sec  
 PW1 3.73 usec  
 IRNUC 1H  
 CTEMP 25.3 c  
 SLVNT CDCL3  
 EXREF 77.00 ppm  
 BF 0.12 Hz  
 RGAIN 56

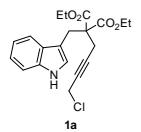

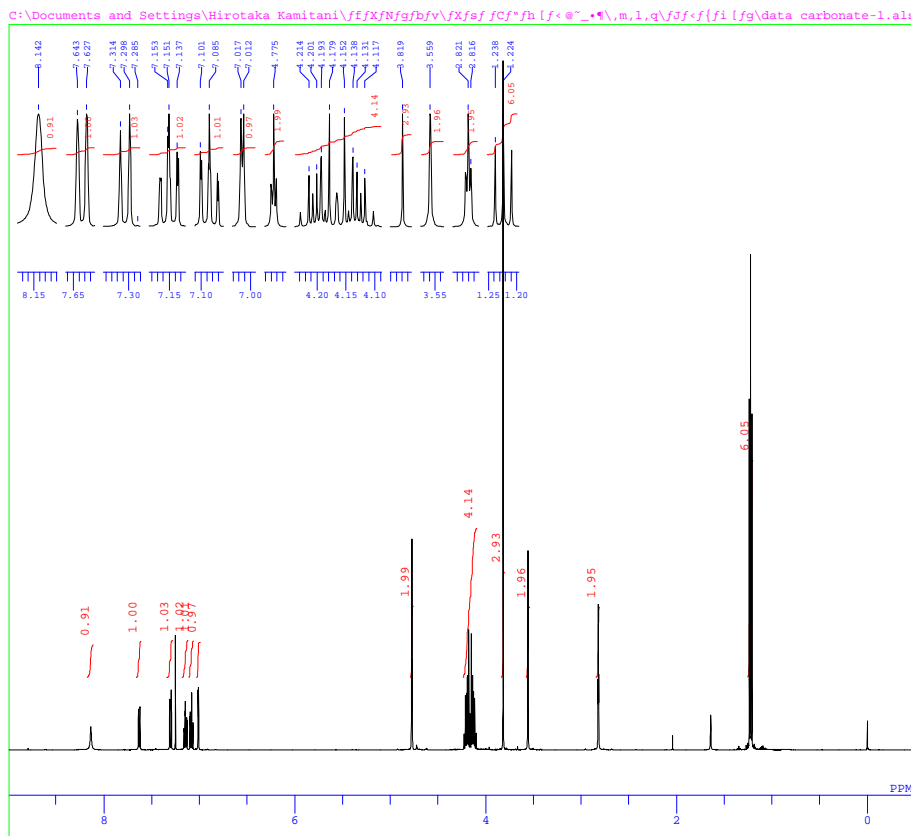

DFILE data carbonate-1.als  
COMNT single\_pulse  
DATIM 2013-05-10 15:29:01  
OBNUC 1H  
EXMOD single\_pulse.ex2  
OBFRQ 500.16 MHz  
OBSET 2.41 KHz  
OBFIN 6.01 Hz  
POINT 13107  
FREQU 7507.39 Hz  
SCANS 8  
ACQTM 1.7459 sec  
PD 5.0000 sec  
PWL 6.50 usec  
IRNUC 1H  
CTEMP 25.5 c  
SLVNT CDCL3  
EXREF 0.00 ppm  
BF 0.12 Hz  
RGAIN 38

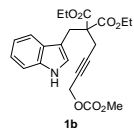

C:\Documents and Settings\Hirota Kamitani\ff\X\Nfg\Bfv\Xf\Jf\Jf\h [f<@~.1\m.l,q\Jf<f\l [fg\data carbonate bcm-1.als

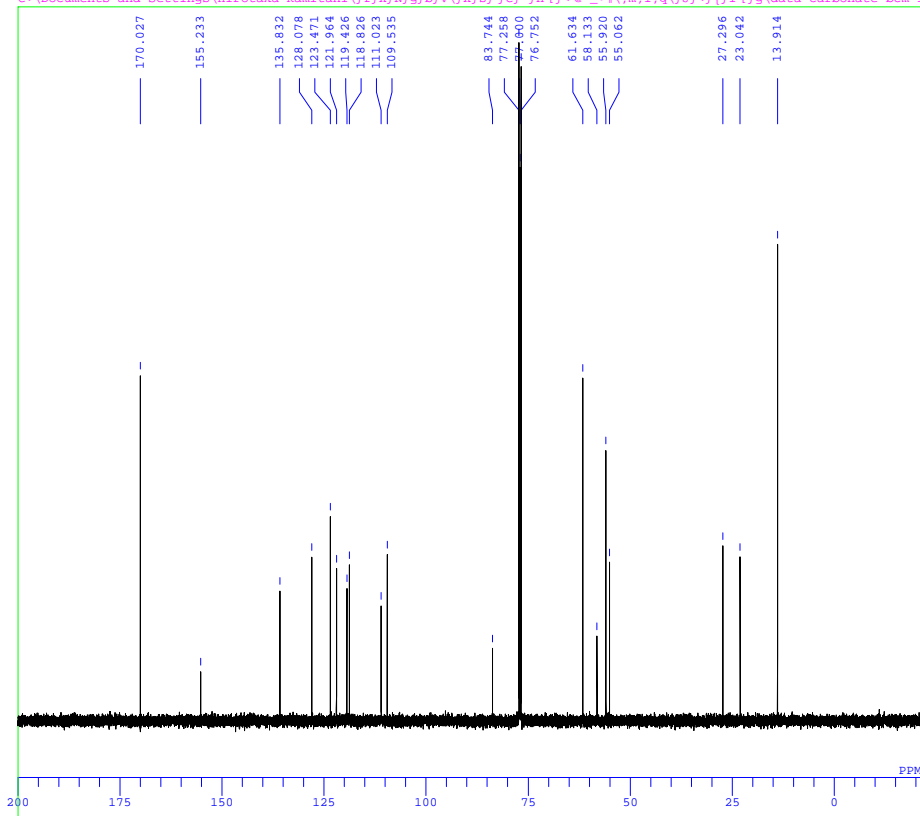

DFILE data carbonate bcm-1.als  
COMNT single pulse decoupled gated NOE  
DATIM 2013-05-10 15:58:49  
OBNUC 13C  
EXMOD single\_pulse\_dec  
OBFRQ 125.77 MHz  
OBSET 7.87 KHz  
OBFIN 4.21 Hz  
POINT 26214  
FREQU 31446.06 Hz  
SCANS 616  
ACQTM 0.8336 sec  
PD 2.0000 sec  
PWL 3.73 usec  
IRNUC 1H  
CTEMP 26.2 c  
SLVNT CDCL3  
EXREF 77.00 ppm  
BF 0.12 Hz  
RGAIN 56

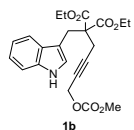

C:\Documents and Settings\Hirota Kamitani\fx\Nfg\bfv\fx\sf\fc\\*h [f<@\*~\*\,m,l,q\uf f,fA/f@\*@,r,P,O\F-105-data-1.als

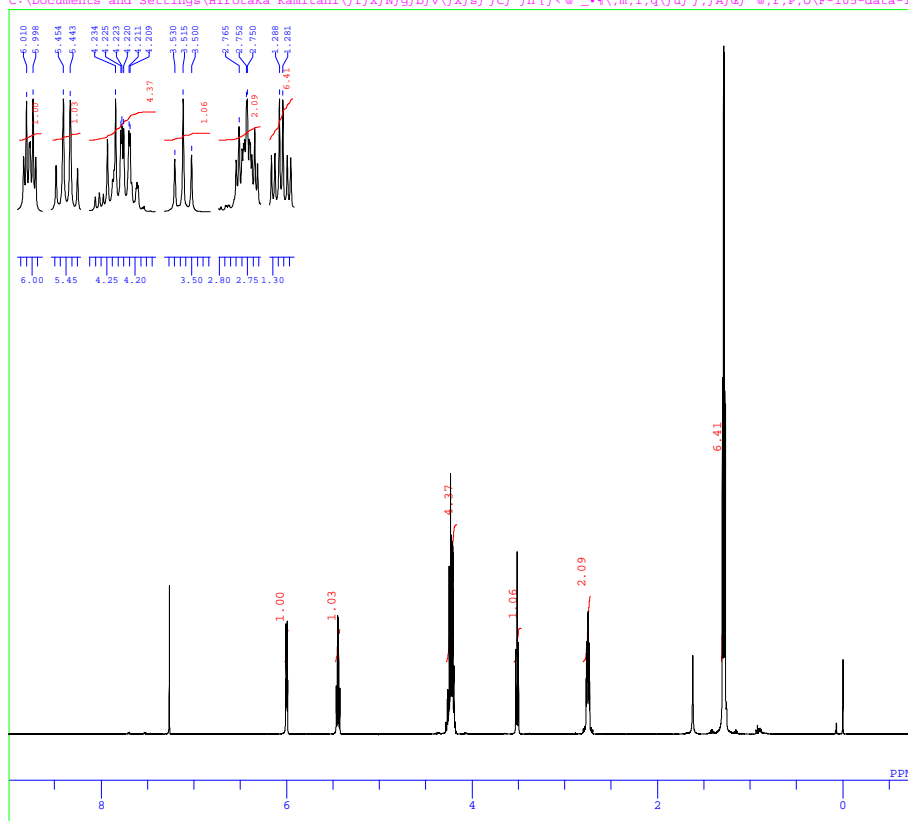

DFILE F-105-data-1.als  
 COMNT single\_pulse  
 DATIM 2013-07-13 13:25:56  
 OBNUC 1H  
 EXMOD single\_pulse.ex2  
 OBFREQ 500.16 MHz  
 OBSET 2.41 KHz  
 OBFIN 6.01 Hz  
 POINT 52428  
 FREQU 7507.39 Hz  
 SCANS 4  
 ACQTM 6.9835 sec  
 PD 5.0000 sec  
 PWL 6.50 usec  
 IRNUC 1H  
 CTEMP 25.0 c  
 SLVNT CDCL3  
 EXREF 0.00 ppm  
 BF 0.12 Hz  
 RGAIN 40

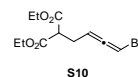

C:\Documents and Settings\Hirota Kamitani\fx\Nfg\bfv\fx\sf\fc\\*h [f<@\*~\*\,m,l,q\uf f,fA/f@\*@,r,P,O\F-105-data bcm-1.als

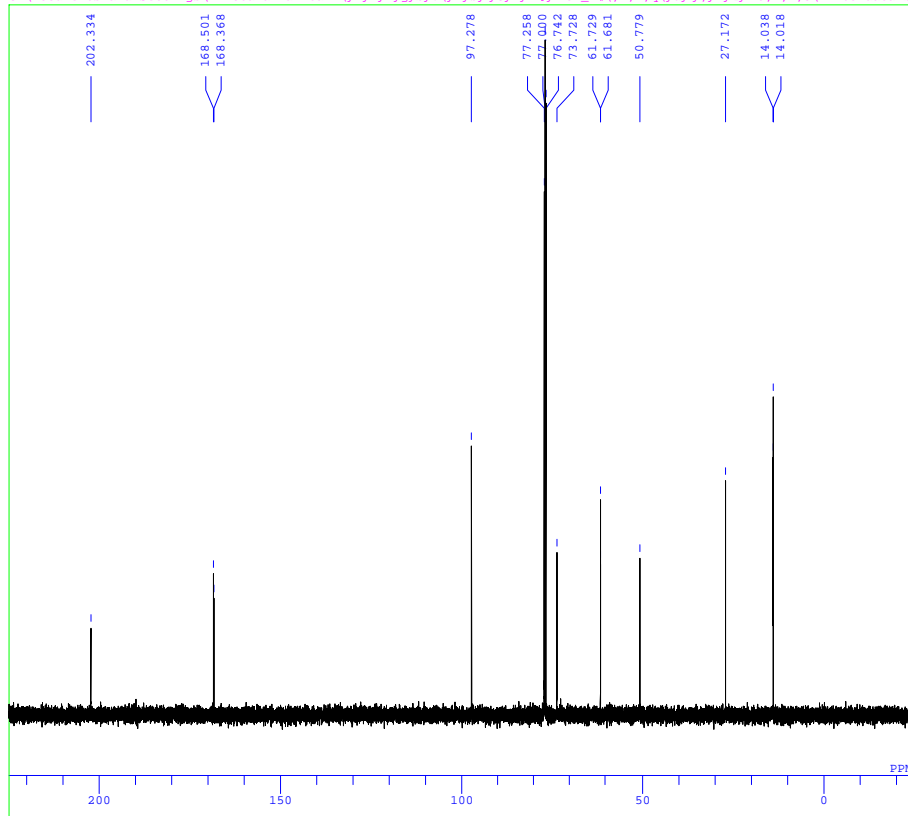

DFILE F-105-data bcm-1.als  
 COMNT single\_pulse decoupled gated NOE  
 DATIM 2013-07-13 13:42:20  
 OBNUC 13C  
 EXMOD single\_pulse\_dec  
 OBFREQ 125.77 MHz  
 OBSET 7.87 KHz  
 OBFIN 4.21 Hz  
 POINT 26214  
 FREQU 31446.06 Hz  
 SCANS 333  
 ACQTM 0.8336 sec  
 PD 2.0000 sec  
 PWL 3.73 usec  
 IRNUC 1H  
 CTEMP 25.4 c  
 SLVNT CDCL3  
 EXREF 77.00 ppm  
 BF 0.12 Hz  
 RGAIN 52

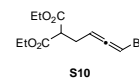

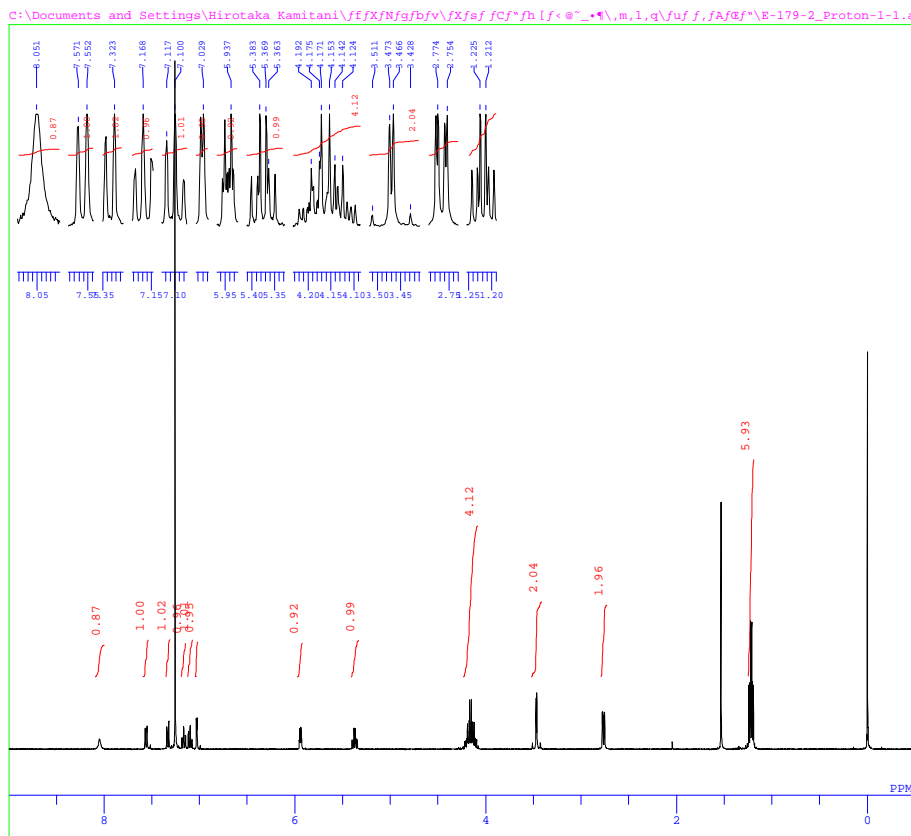

DFILE E-179-2-Proton-1-1.als  
 COMNT single\_pulse  
 DATIM 2013-02-07 10:02:40  
 OBNUC 1H  
 EXMOD proton.jxp  
 OBFRO 399.78 MHz  
 OBSSE 4.19 KHz  
 OBFIN 7.29 Hz  
 POINT 13107  
 FREQU 7598.78 Hz  
 SCANS 8  
 ACQTM 1.7249 sec  
 PD 5.0000 sec  
 PWL 4.65 usec  
 IRNUC 1H  
 CTEMP 25.2 c  
 SLVNT CDCL3  
 EXREF 0.00 ppm  
 BF 0.12 Hz  
 RGAIN 52

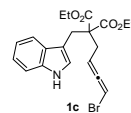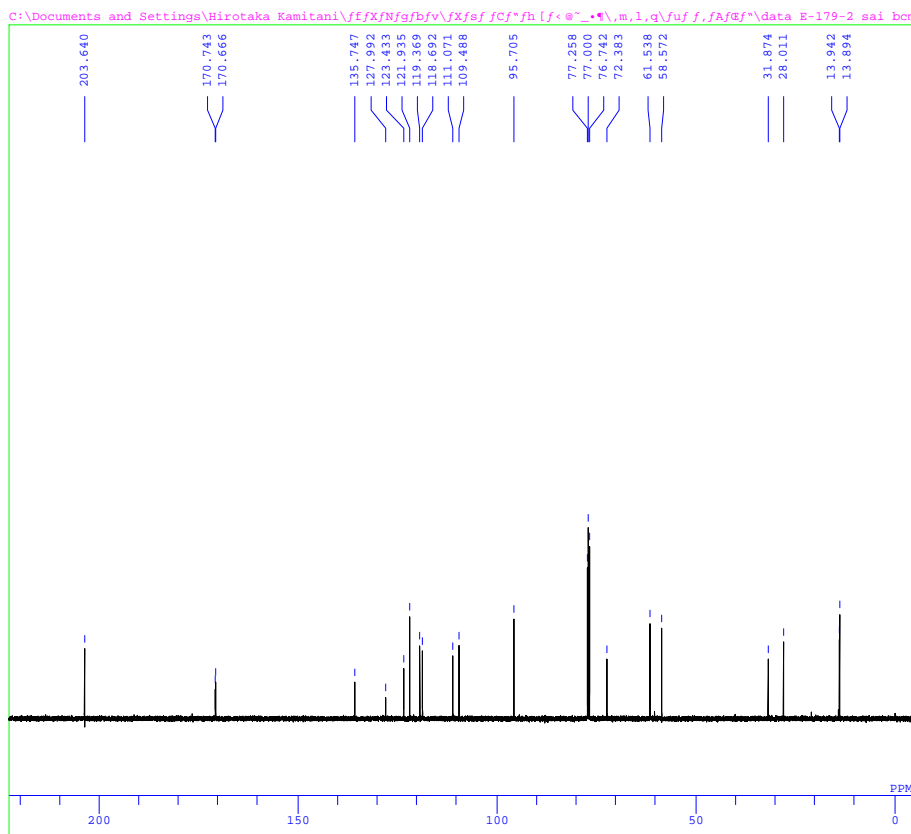

DFILE data E-179-2 sai bcm-1.als  
 COMNT single\_pulse decoupled gated NOE  
 DATIM 2013-05-11 14:08:34  
 OBNUC 13C  
 EXMOD single\_pulse\_dec  
 OBFRO 125.77 MHz  
 OBSSE 7.87 KHz  
 OBFIN 4.21 Hz  
 POINT 26214  
 FREQU 31446.06 Hz  
 SCANS 344  
 ACQTM 0.8336 sec  
 PD 2.0000 sec  
 PWL 3.73 usec  
 IRNUC 1H  
 CTEMP 25.8 c  
 SLVNT CDCL3  
 EXREF 77.00 ppm  
 BF 0.12 Hz  
 RGAIN 56

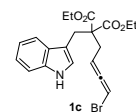



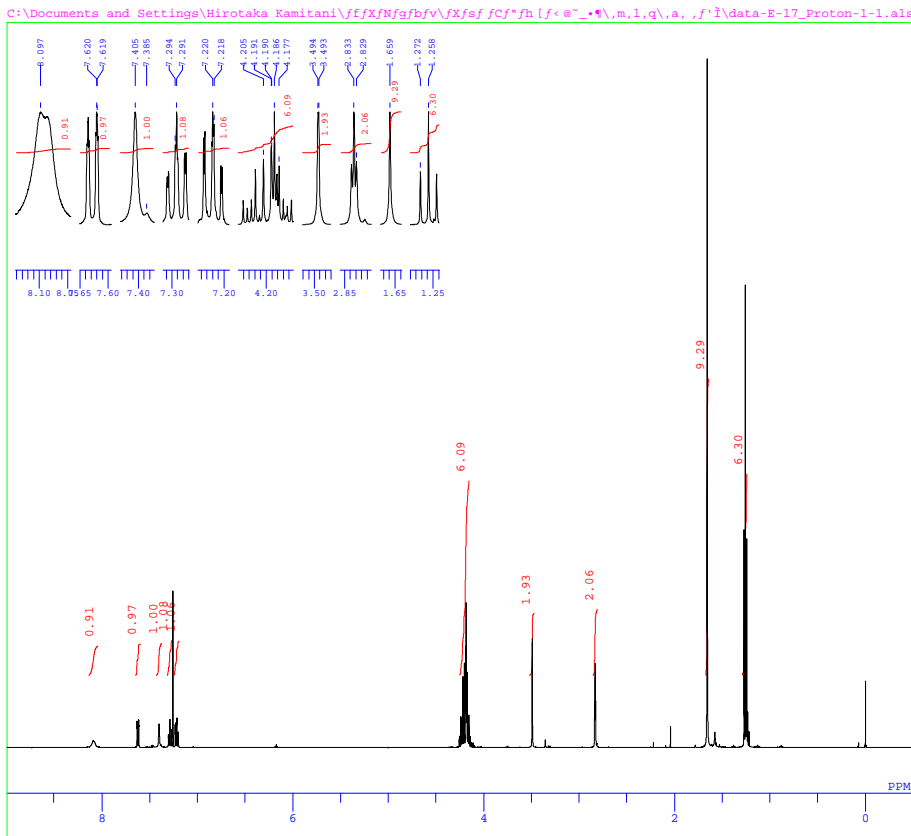

DFILE data-E-17-Proton-1-1.als  
 COMNT single\_pulse  
 DATIM 2013-04-03 13:30:43  
 OBNUC 1H  
 EXMOD single\_pulse.ex2  
 OBFRO 500.16 MHz  
 OBSSE 2.41 KHz  
 OBFIN 6.01 Hz  
 POINT 52428  
 FREQU 7507.39 Hz  
 SCANS 8  
 ACQTM 6.9835 sec  
 PD 5.0000 sec  
 PWL 6.50 usec  
 IRNUC 1H  
 CTEMP 24.8 c  
 SLVNT CDCL3  
 EXREF 0.00 ppm  
 BF 0.12 Hz  
 RGAIN 40

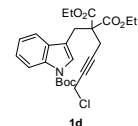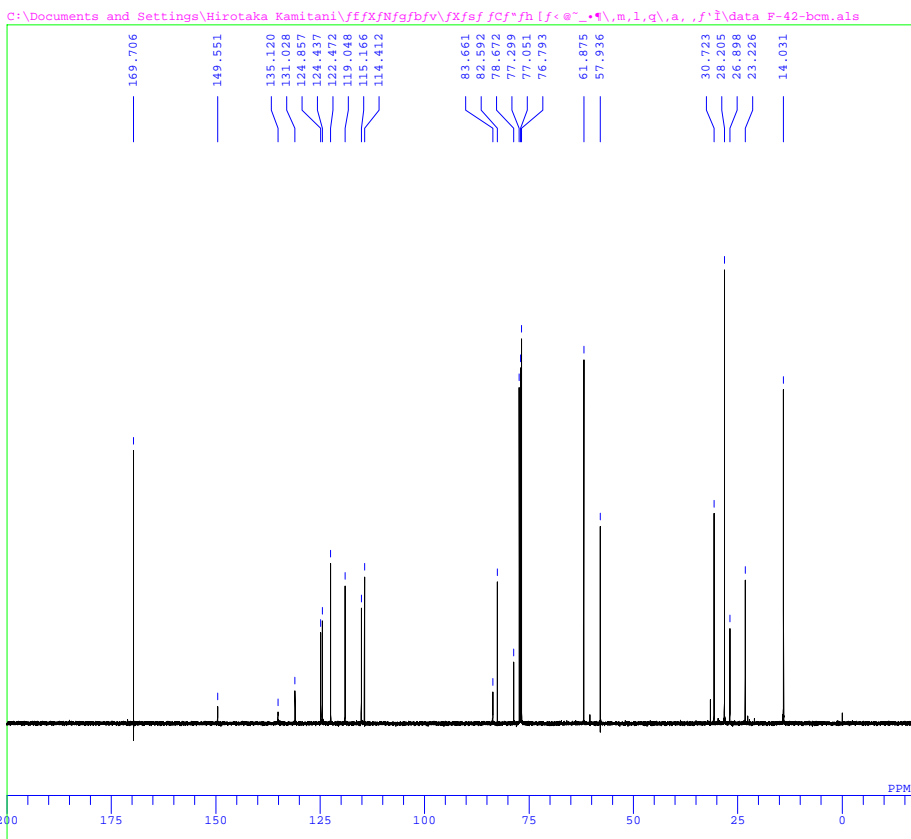

DFILE data F-42-bcm.als  
 COMNT single\_pulse decoupled gated NOE  
 DATIM 2013-04-17 08:00:08  
 OBNUC 13C  
 EXMOD single\_pulse\_dec  
 OBFRO 125.77 MHz  
 OBSSE 7.87 KHz  
 OBFIN 4.21 Hz  
 POINT 26214  
 FREQU 31446.06 Hz  
 SCANS 2400  
 ACQTM 0.8336 sec  
 PD 2.0000 sec  
 PWL 3.73 usec  
 IRNUC 1H  
 CTEMP 25.7 c  
 SLVNT CDCL3  
 EXREF 0.00 ppm  
 BF 0.12 Hz  
 RGAIN 60

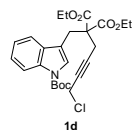

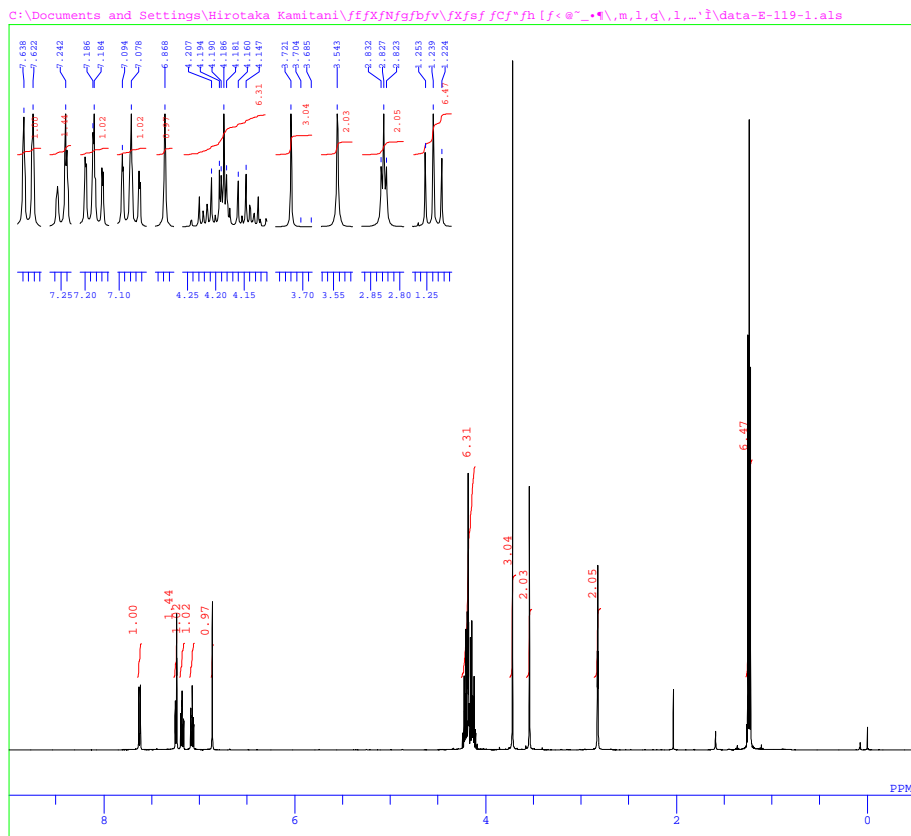

DFILE data-E-119-1.als  
 COMNT single\_pulse  
 DATIM 2013-04-03 19:01:25  
 OBNUC 1H  
 EXMOD single\_pulse.ex2  
 OBFRO 500.16 MHz  
 OBSET 2.41 KHz  
 OBFIN 6.01 Hz  
 POINT 13107  
 FREQU 7507.39 Hz  
 SCANS 8  
 ACQTM 1.7459 sec  
 PD 5.0000 sec  
 PW1 6.50 usec  
 IRNUC 1H  
 CTEMP 24.9 c  
 SLVNT CDCL3  
 EXREF 0.00 ppm  
 BF 0.12 Hz  
 RGAIN 34

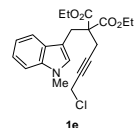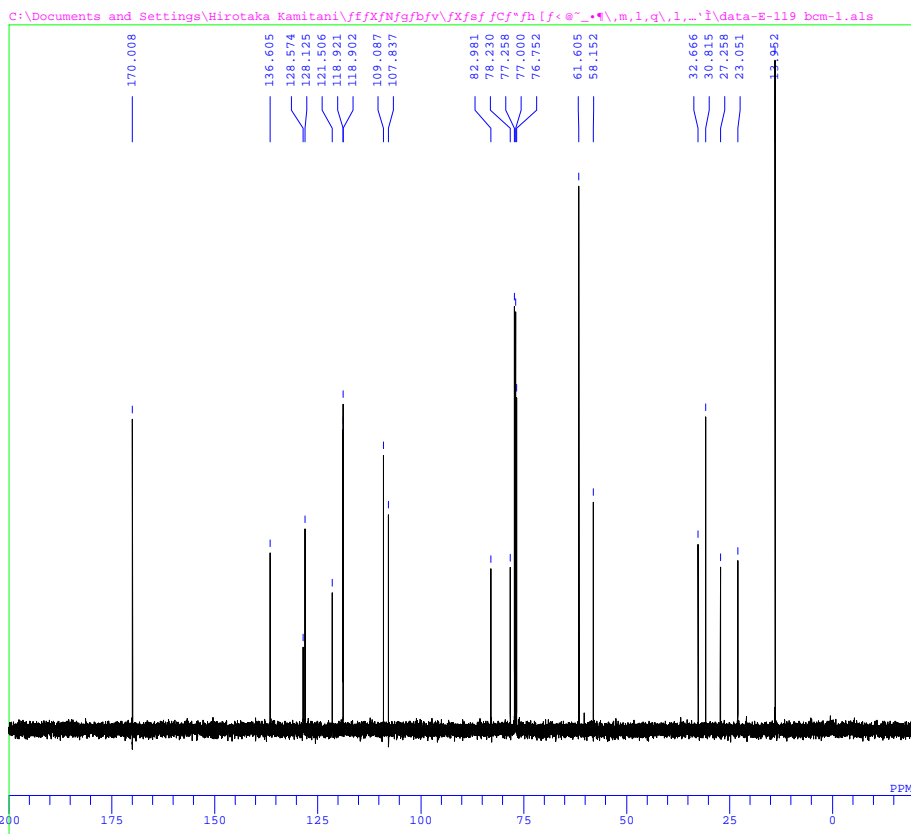

DFILE data-E-119 bcm-1.als  
 COMNT single\_pulse decoupled gated NOE  
 DATIM 2013-04-03 19:08:42  
 OBNUC 13C  
 EXMOD single\_pulse\_dec  
 OBFRO 125.77 MHz  
 OBSET 7.87 KHz  
 OBFIN 4.21 Hz  
 POINT 26214  
 FREQU 31446.06 Hz  
 SCANS 142  
 ACQTM 0.8336 sec  
 PD 2.0000 sec  
 PW1 3.73 usec  
 IRNUC 1H  
 CTEMP 25.2 c  
 SLVNT CDCL3  
 EXREF 77.00 ppm  
 BF 0.12 Hz  
 RGAIN 54

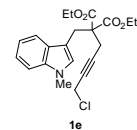

C:\Documents and Settings\HirotaKa Kamitani\ff\X\N\g\bfv\j\fsf\cf\*fh [f<@-.\*\m.l,q\F-ff'\dataE-158-sai-2.als

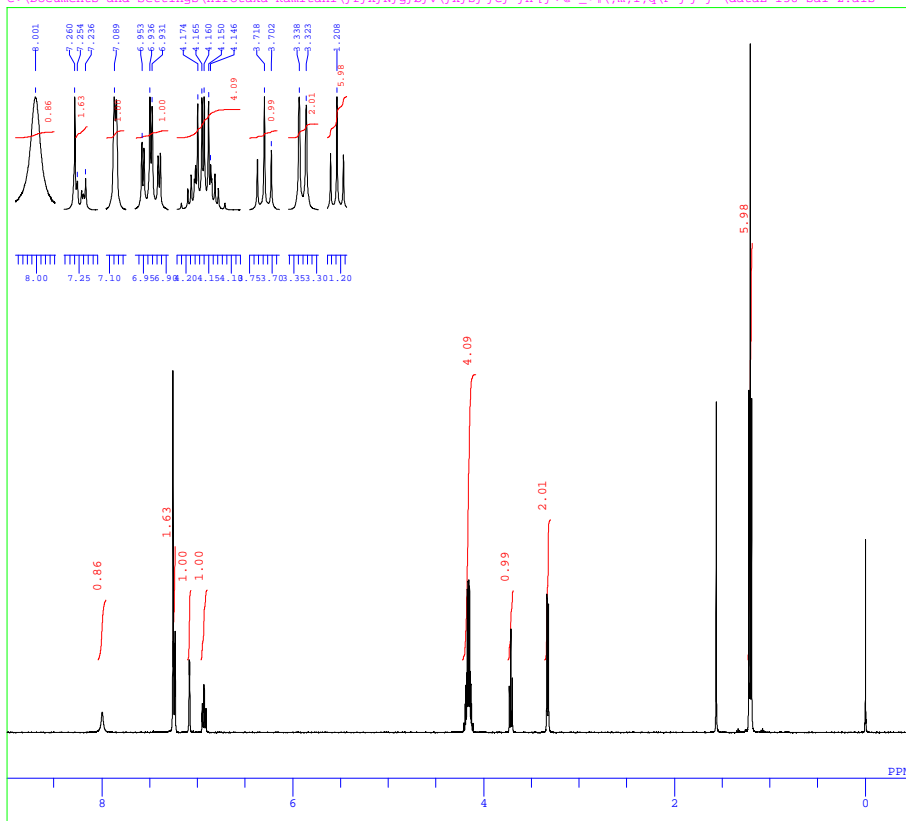

DFILE dataE-158-sai-2.als  
 COMNT single\_pulse  
 DATIM 2013-06-21 13:18:46  
 OBNUC 1H  
 EXMOD single\_pulse.ex2  
 OBFRQ 500.16 MHz  
 OBSET 2.41 KHz  
 OBFIN 6.01 Hz  
 POINT 52428  
 FREQU 7507.39 Hz  
 SCANS 8  
 ACQTM 6.9835 sec  
 PD 5.0000 sec  
 PW1 6.50 usec  
 IRNUC 1H  
 CTEMP 25.4 c  
 SLVNT CDCL3  
 EXREF 0.00 ppm  
 BF 0.12 Hz  
 RGAIN 50

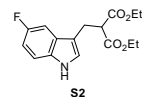

C:\Documents and Settings\HirotaKa Kamitani\ff\X\N\g\bfv\j\fsf\cf\*fh [f<@-.\*\m.l,q\F-ff'\E-158--BCM-data-1.als

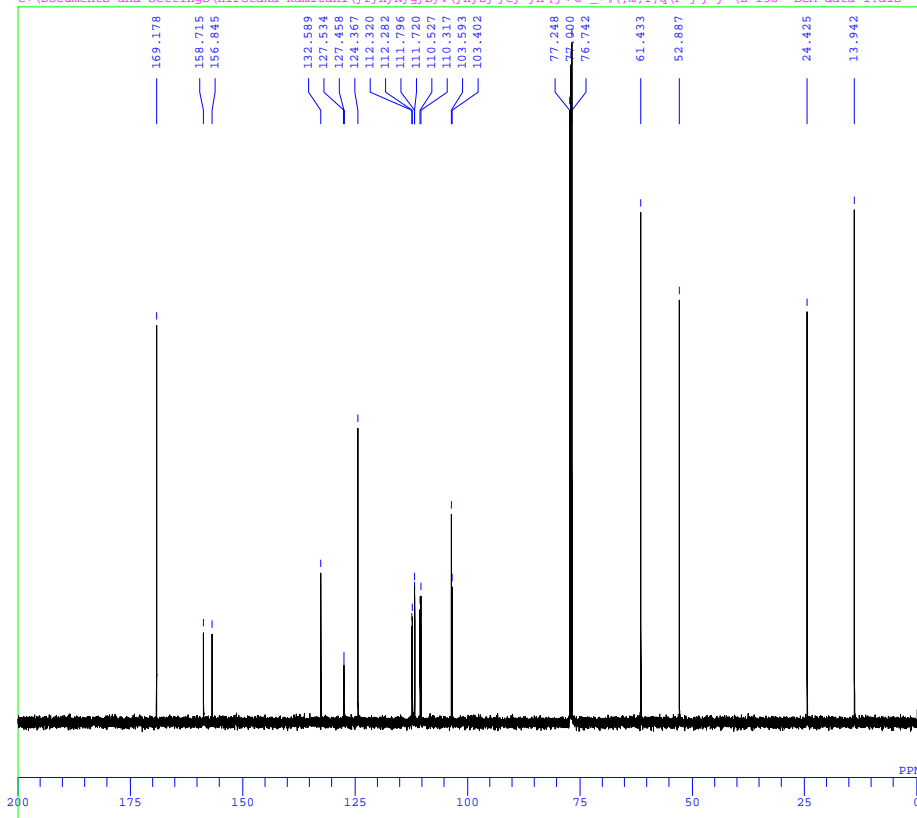

DFILE E-158--BCM-data-1.als  
 COMNT single\_pulse decoupled gated NOE  
 DATIM 2013-01-15 15:29:47  
 OBNUC 13C  
 EXMOD single\_pulse\_dec  
 OBFRQ 125.77 MHz  
 OBSET 7.87 KHz  
 OBFIN 4.21 Hz  
 POINT 26214  
 FREQU 31446.06 Hz  
 SCANS 688  
 ACQTM 0.8336 sec  
 PD 2.0000 sec  
 PW1 3.73 usec  
 IRNUC 1H  
 CTEMP 26.2 c  
 SLVNT CDCL3  
 EXREF 77.00 ppm  
 BF 0.12 Hz  
 RGAIN 58

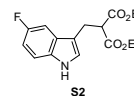

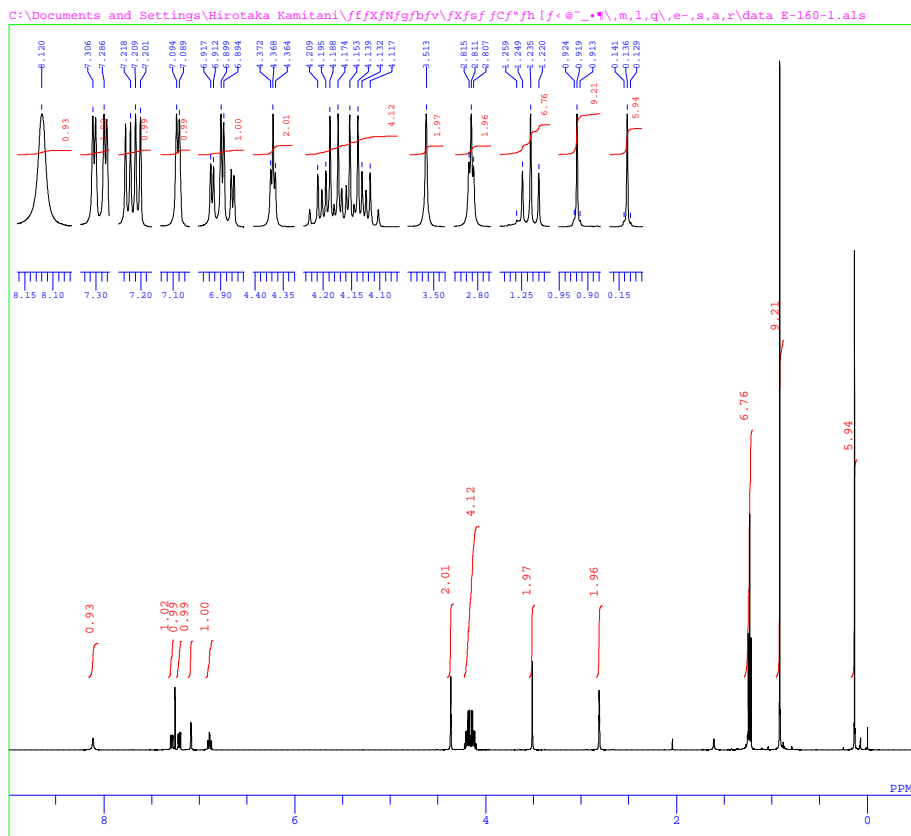

DFILE data E-160-1.als  
 COMNT single\_pulse  
 DATIM 2013-04-04 23:52:33  
 OBNUC 1H  
 EXMOD single\_pulse.ex2  
 OBFREQ 500.16 MHz  
 OBSSET 2.41 KHz  
 OBFIN 6.01 Hz  
 POINT 52428  
 FREQU 7507.39 Hz  
 SCANS 8  
 ACQTM 6.9835 sec  
 PD 5.0000 sec  
 PW1 6.50 usec  
 IRNUC 1H  
 CTEMP 25.3 c  
 SLVNT CDCL3  
 EXREF 0.00 ppm  
 BF 0.12 Hz  
 RGAIN 38

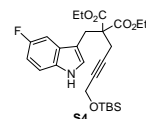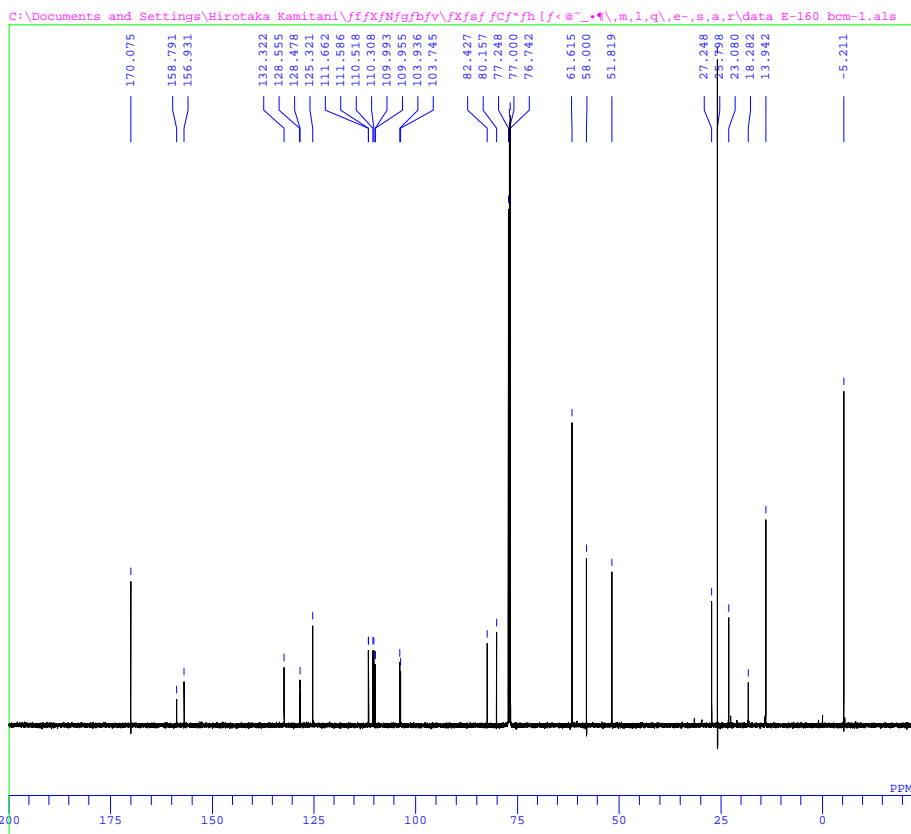

DFILE data E-160-bcm-1.als  
 COMNT single\_pulse decoupled gated NOE  
 DATIM 2013-04-05 03:04:19  
 OBNUC 13C  
 EXMOD single\_pulse\_dec  
 OBFREQ 125.77 MHz  
 OBSSET 7.87 KHz  
 OBFIN 4.21 Hz  
 POINT 26214  
 FREQU 31446.06 Hz  
 SCANS 4048  
 ACQTM 0.8336 sec  
 PD 2.0000 sec  
 PW1 3.73 usec  
 IRNUC 1H  
 CTEMP 25.6 c  
 SLVNT CDCL3  
 EXREF 77.00 ppm  
 BF 0.12 Hz  
 RGAIN 58

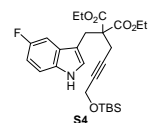

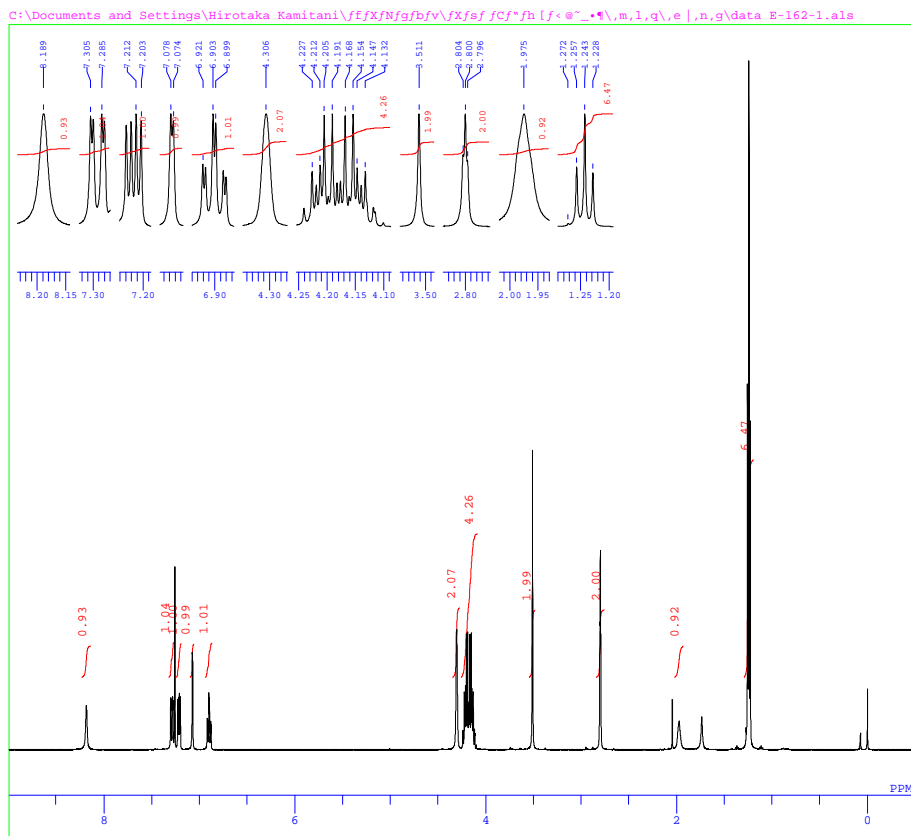

DFILE data E-162-1.als  
 COMNT single\_pulse  
 DATIM 2013-04-04 09:27:30  
 OBNUC 1H  
 EXMOD single\_pulse.ex2  
 OBFREQ 500.16 MHz  
 OBSSET 2.41 KHz  
 OBFIN 6.01 Hz  
 POINT 52428  
 FREQU 7507.39 Hz  
 SCANS 8  
 ACQTM 6.9835 sec  
 PD 5.0000 sec  
 PW1 6.50 usec  
 IRNUC 1H  
 CTEMP 25.2 c  
 SLVNT CDCL3  
 EXREF 0.00 ppm  
 BF 0.12 Hz  
 RGAIN 42

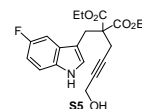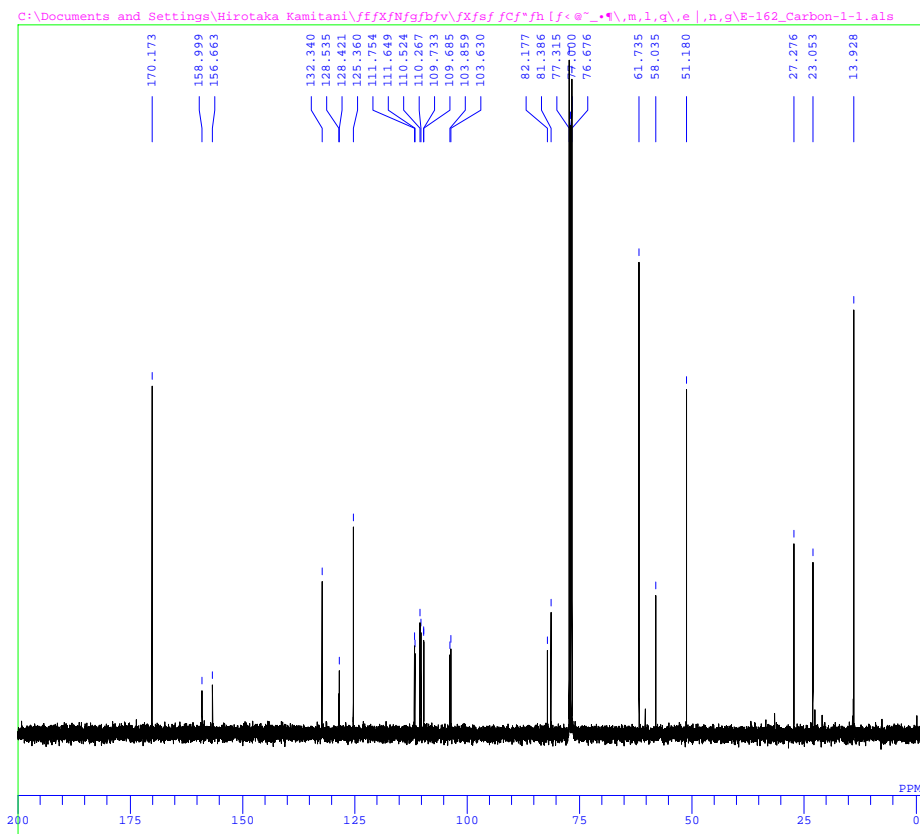

DFILE E-162\_Carbon-1-1.als  
 COMNT single\_pulse decoupled gated NOE  
 DATIM 2013-01-17 10:23:53  
 OBNUC 13C  
 EXMOD carbon.jxp  
 OBFREQ 100.53 MHz  
 OBSSET 5.35 KHz  
 OBFIN 5.86 Hz  
 POINT 26214  
 FREQU 25125.63 Hz  
 SCANS 400  
 ACQTM 1.0433 sec  
 PD 2.0000 sec  
 PW1 3.00 usec  
 IRNUC 1H  
 CTEMP 26.3 c  
 SLVNT CDCL3  
 EXREF 77.00 ppm  
 BF 0.12 Hz  
 RGAIN 60

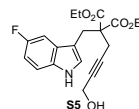

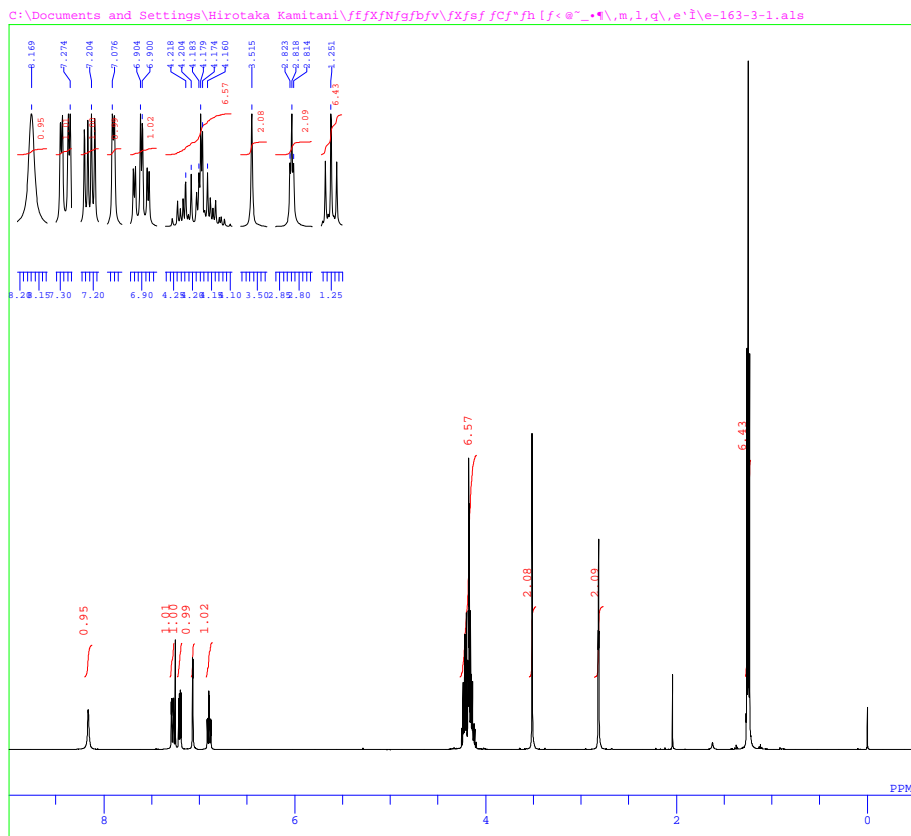

DFILE e-163-3-1.als  
 COMNT single\_pulse  
 DATIM 2013-01-23 15:50:46  
 OBNUC 1H  
 EXMOD single\_pulse.ex2  
 OBFRO 500.16 MHz  
 OBSET 2.41 KHz  
 OBFIN 6.01 Hz  
 POINT 13107  
 FREQU 7507.39 Hz  
 SCANS 8  
 ACQTM 1.7459 sec  
 PD 5.0000 sec  
 PWL 6.90 usec  
 IRNUC 1H  
 CTEMP 27.3 c  
 SLVNT CDCL3  
 EXREF 0.00 ppm  
 BF 0.12 Hz  
 RGAIN 30

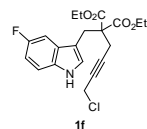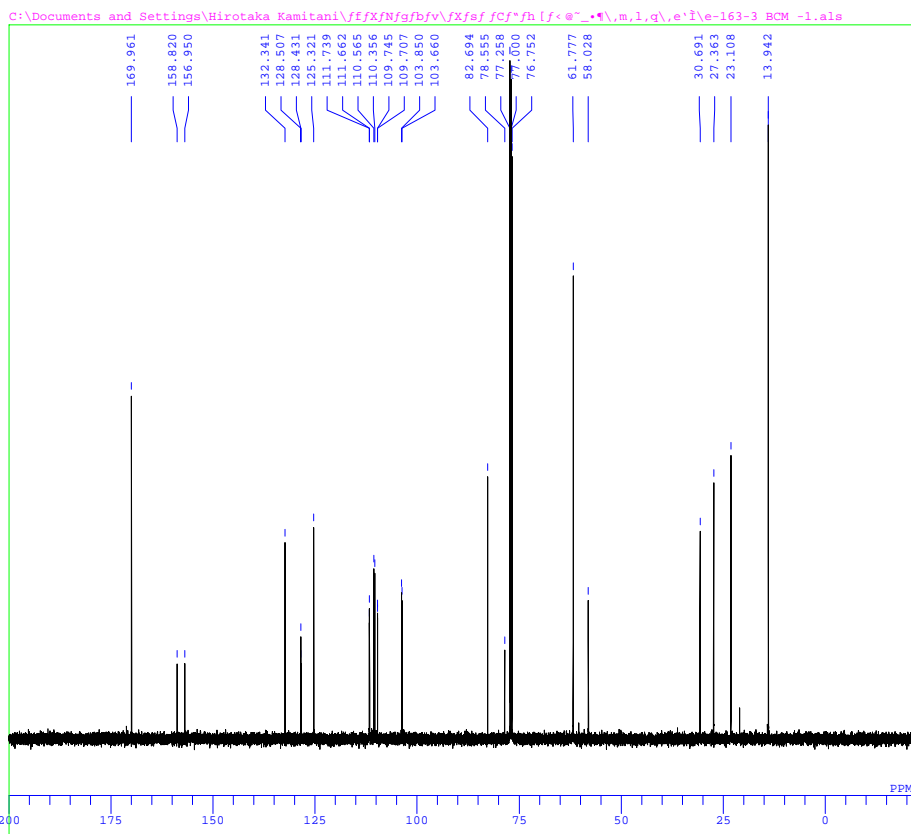

DFILE e-163-3 BCM -1.als  
 COMNT single\_pulse\_decoupled gated NOE  
 DATIM 2013-01-23 16:13:22  
 OBNUC 13C  
 EXMOD single\_pulse\_dec  
 OBFRO 125.77 MHz  
 OBSET 7.87 KHz  
 OBFIN 4.21 Hz  
 POINT 26214  
 FREQU 31446.06 Hz  
 SCANS 466  
 ACQTM 0.8336 sec  
 PD 2.0000 sec  
 PWL 3.73 usec  
 IRNUC 1H  
 CTEMP 27.7 c  
 SLVNT CDCL3  
 EXREF 77.00 ppm  
 BF 0.12 Hz  
 RGAIN 54

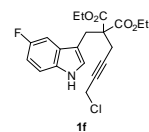

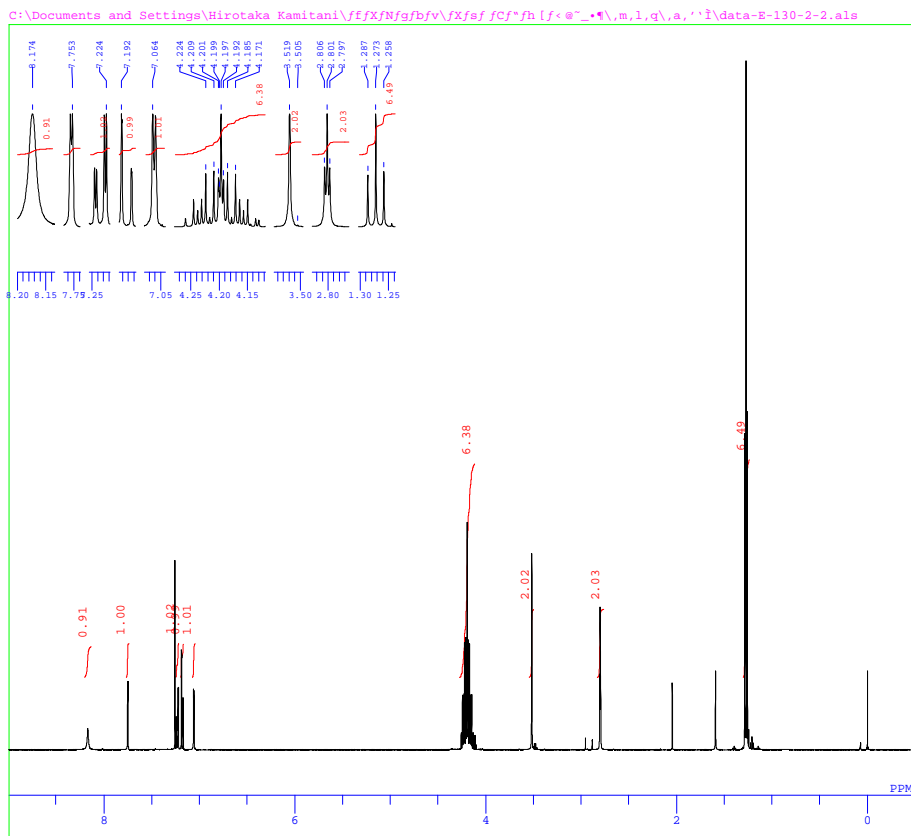

DFILE data-E-130-2-2.als  
 COMNT single\_pulse  
 DATIM 2013-04-03 10:19:53  
 OBNUC 1H  
 EXMOD single\_pulse.ex2  
 OBFRO 500.16 MHz  
 OBSET 2.41 KHz  
 OBFIN 6.01 Hz  
 POINT 52428  
 FREQU 7507.39 Hz  
 SCANS 8  
 ACQTM 6.9835 sec  
 PD 5.0000 sec  
 PWL 6.50 usec  
 IRNUC 1H  
 CTEMP 25.1 c  
 SLVNT CDCL3  
 EXREF 0.00 ppm  
 BF 0.12 Hz  
 RGAIN 42

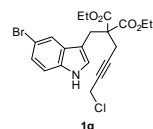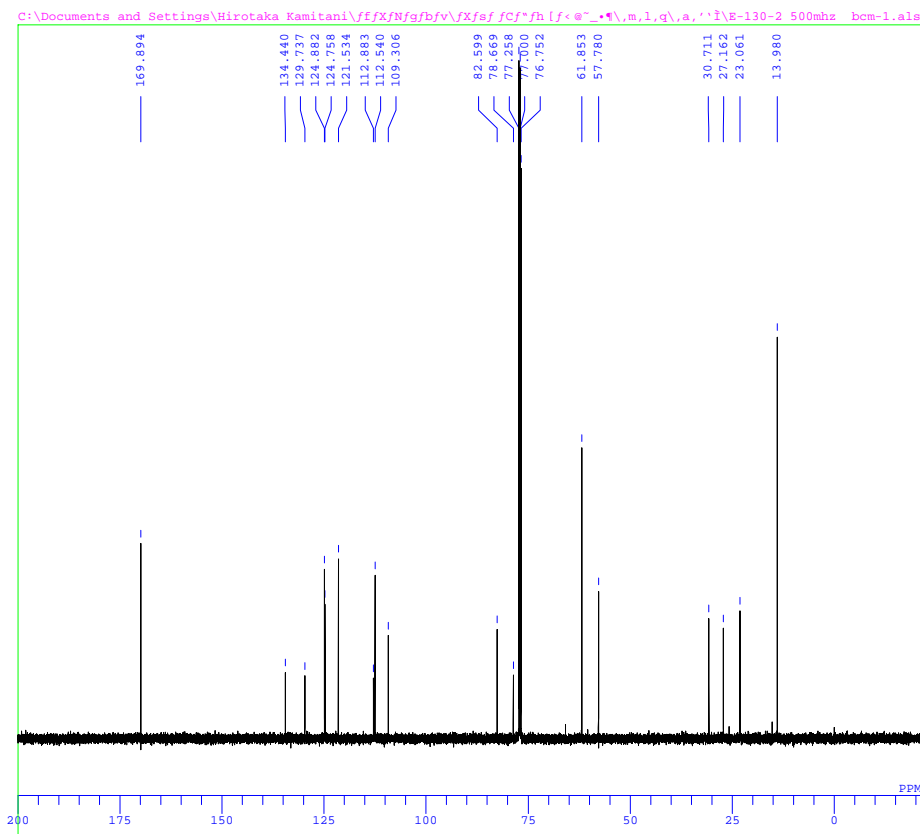

DFILE E-130-2 500mhz bcm-1.als  
 COMNT single\_pulse\_decoupled gated NOE  
 DATIM 2012-12-03 19:23:44  
 OBNUC 13C  
 EXMOD single\_pulse\_dec  
 OBFRO 125.77 MHz  
 OBSET 7.87 KHz  
 OBFIN 4.21 Hz  
 POINT 26214  
 FREQU 31446.06 Hz  
 SCANS 1024  
 ACQTM 0.8336 sec  
 PD 2.0000 sec  
 PWL 3.73 usec  
 IRNUC 1H  
 CTEMP 27.7 c  
 SLVNT CDCL3  
 EXREF 77.00 ppm  
 BF 0.12 Hz  
 RGAIN 54

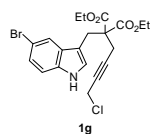

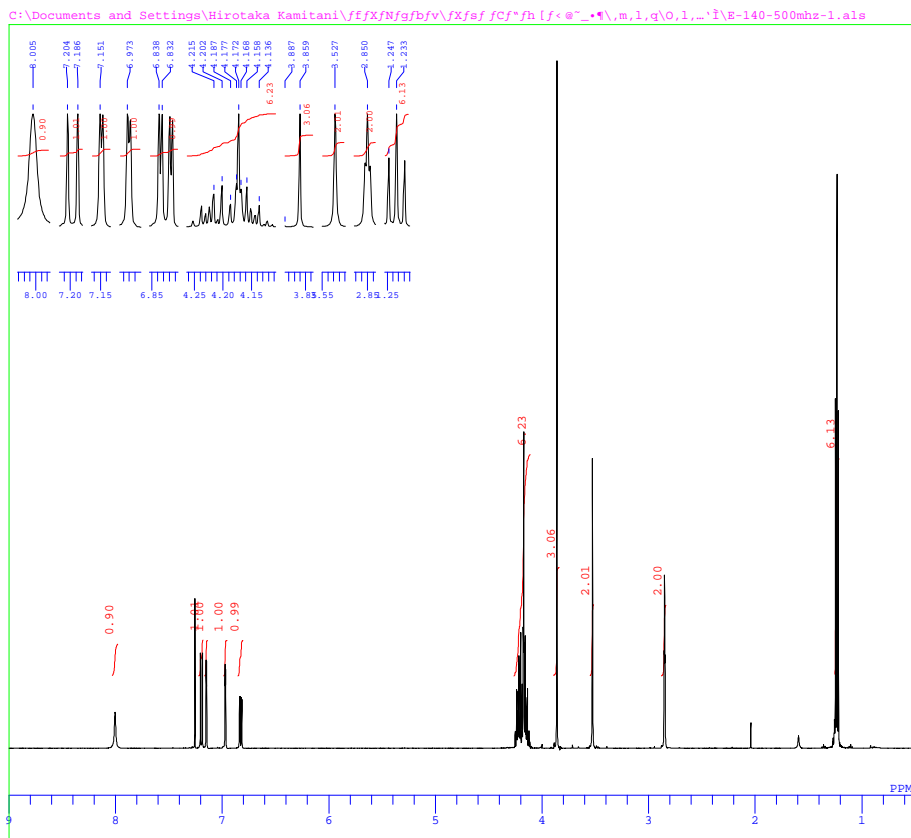

DFILE E-140-500mhz-1.als  
 COMNT single\_pulse  
 DATIM 2012-12-10 09:49:60  
 OBNUC 1H  
 EXMOD single\_pulse.ex2  
 OBFRO 500.16 MHz  
 OBSET 2.41 KHz  
 OBFIN 6.01 Hz  
 POINT 13107  
 FREQU 7507.39 Hz  
 SCANS 8  
 ACQTM 1.7459 sec  
 PD 5.0000 sec  
 PWL 6.50 usec  
 IRNUC 1H  
 CTEMP 28.0 c  
 SLVNT CDCL3  
 EXREF 0.00 ppm  
 BF 0.12 Hz  
 RGAIN 40

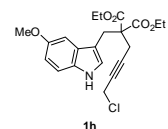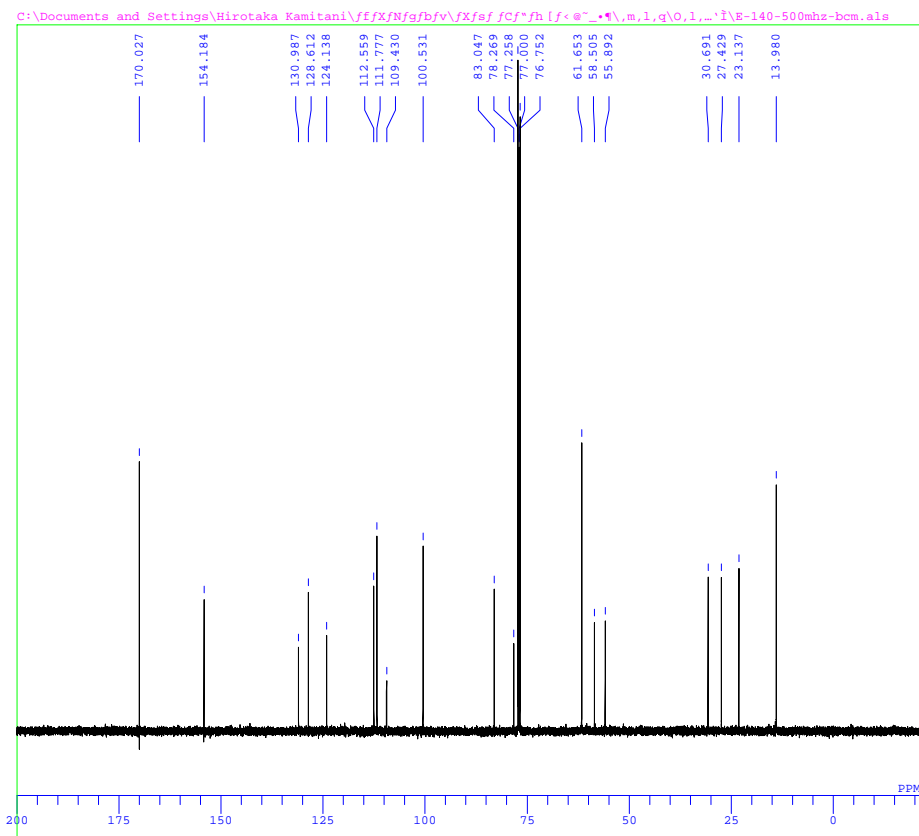

DFILE E-140-500mhz-bcm.als  
 COMNT single\_pulse\_decoupled gated NOE  
 DATIM 2012-12-10 10:39:54  
 OBNUC 13C  
 EXMOD single\_pulse\_dec  
 OBFRO 125.77 MHz  
 OBSET 7.87 KHz  
 OBFIN 4.21 Hz  
 POINT 26214  
 FREQU 31446.06 Hz  
 SCANS 1024  
 ACQTM 0.8336 sec  
 PD 2.0000 sec  
 PWL 3.73 usec  
 IRNUC 13C  
 CTEMP 28.3 c  
 SLVNT CDCL3  
 EXREF 77.00 ppm  
 BF 0.12 Hz  
 RGAIN 56

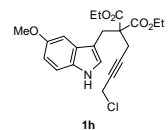



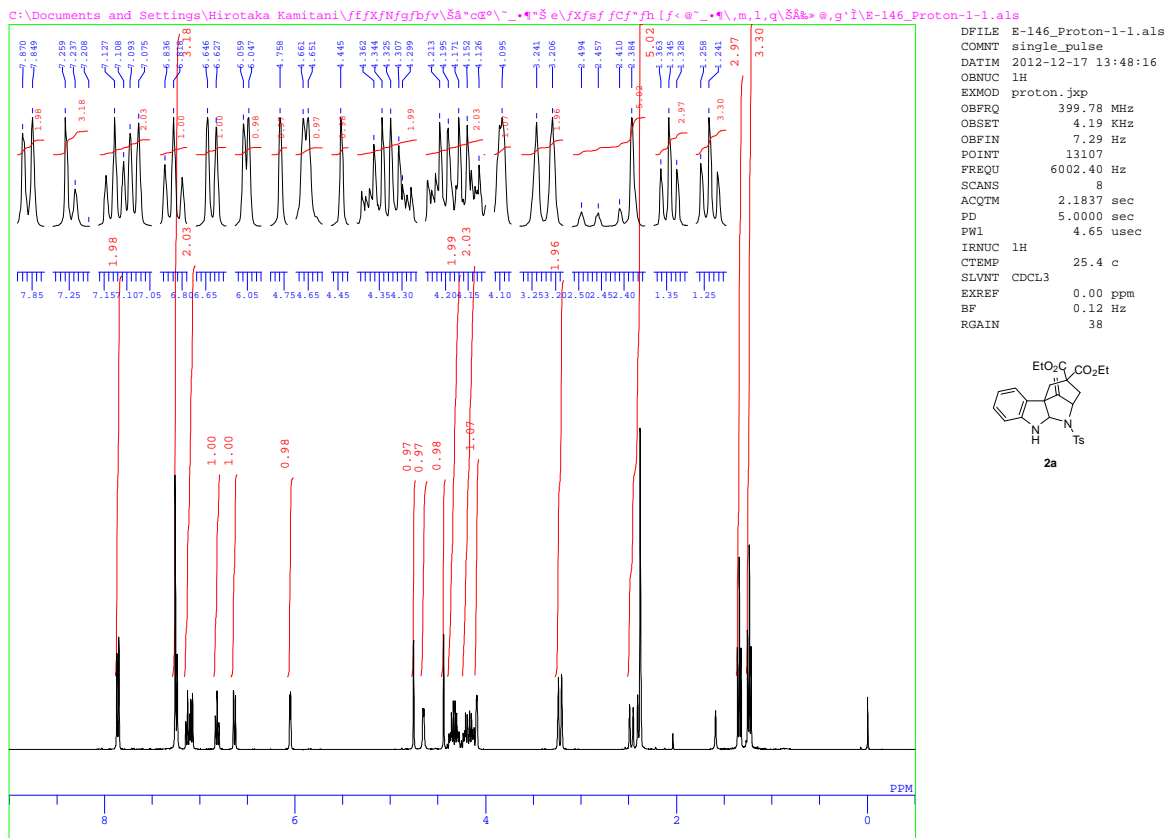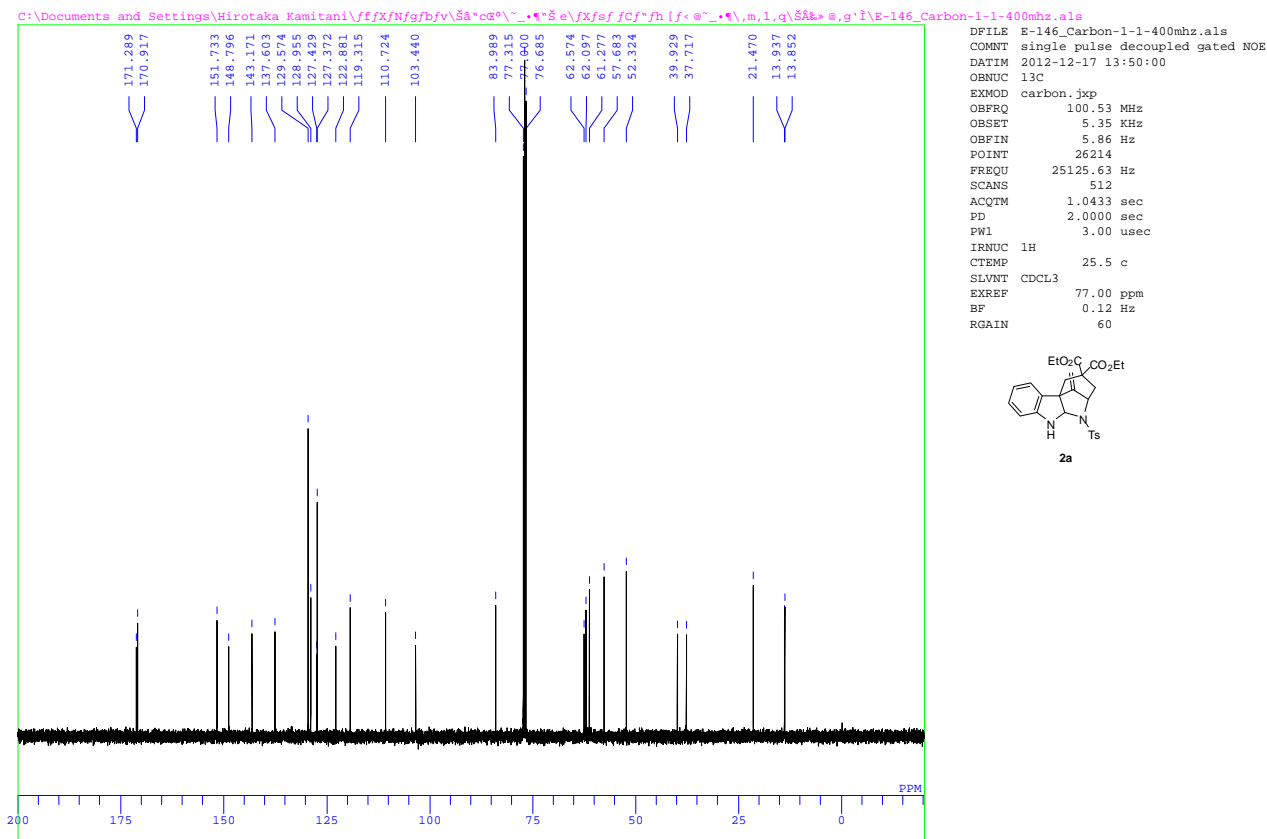

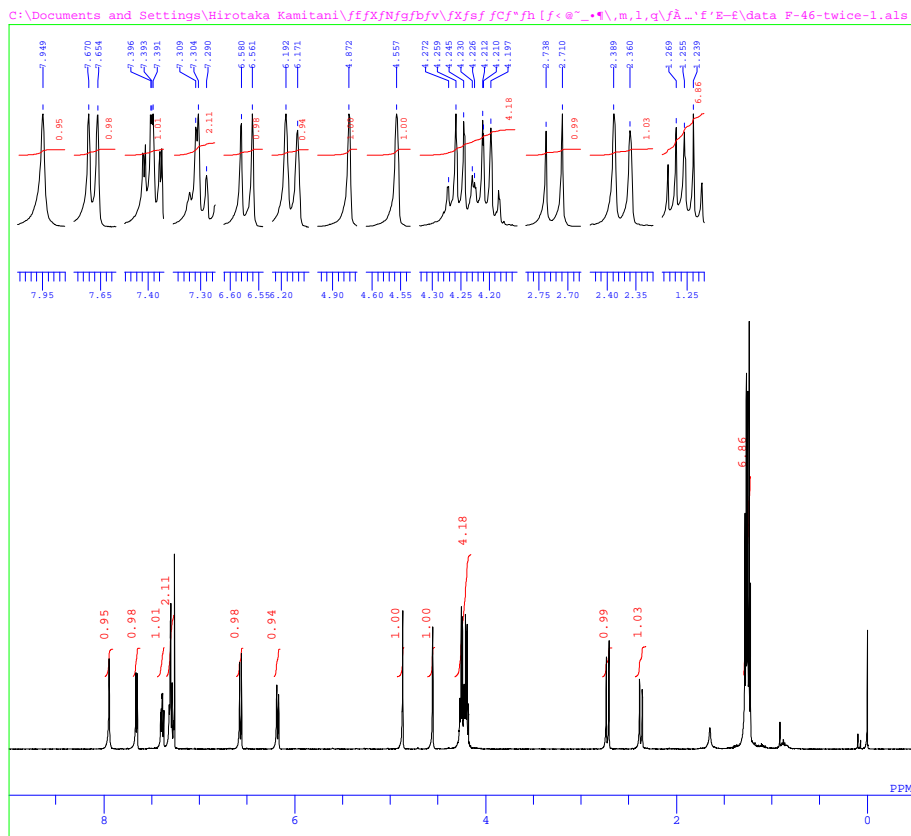

DFILE data F-46-twice-1.als  
 COMNT single\_pulse  
 DATIM 2013-04-22 20:26:03  
 OBNUC 1H  
 EXMOD single\_pulse.ex2  
 OBFRO 500.16 MHz  
 OBSET 2.41 KHz  
 OBFIN 6.01 Hz  
 POINT 13107  
 FREQU 7507.39 Hz  
 SCANS 8  
 ACQTM 1.7459 sec  
 PD 5.0000 sec  
 PW1 6.50 usec  
 IRNUC 1H  
 CTEMP 25.7 c  
 SLVNT CDCL3  
 EXREF 0.00 ppm  
 BF 0.12 Hz  
 RGAIN 46

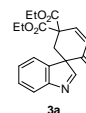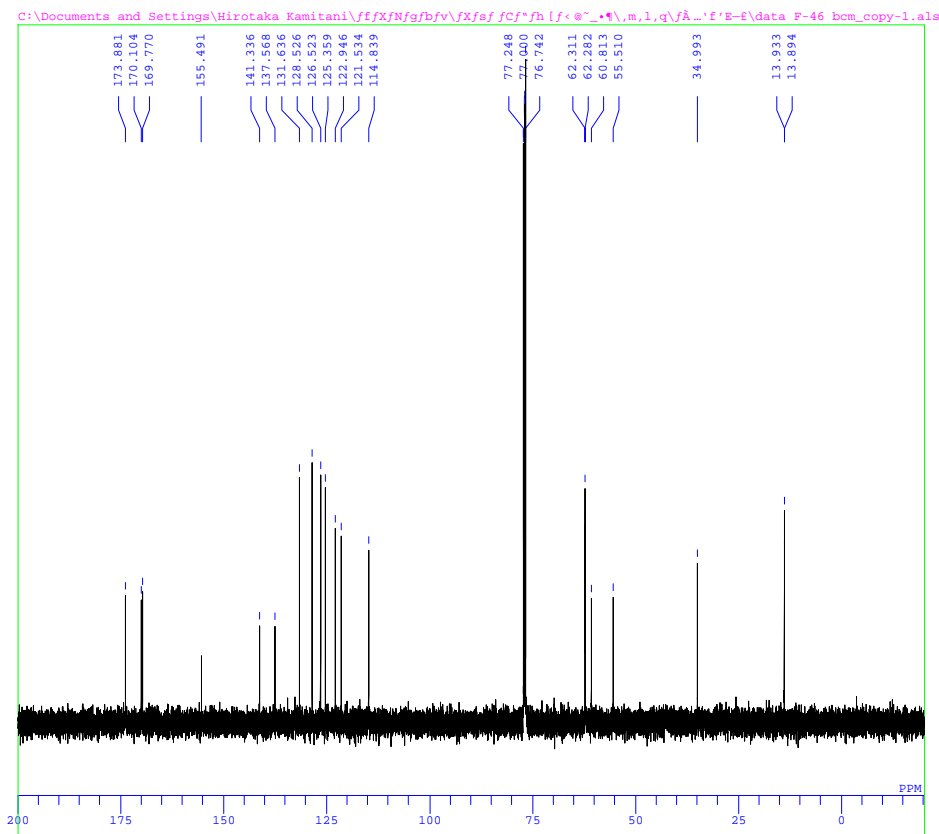

DFILE data F-46 bcm\_copy-1.als  
 COMNT single\_pulse decoupled gated NOE  
 DATIM 2013-04-20 16:10:50  
 OBNUC 13C  
 EXMOD single\_pulse\_dec  
 OBFRO 125.77 MHz  
 OBSET 7.87 KHz  
 OBFIN 4.21 Hz  
 POINT 26214  
 FREQU 31446.06 Hz  
 SCANS 417  
 ACQTM 0.8336 sec  
 PD 2.0000 sec  
 PW1 3.73 usec  
 IRNUC 1H  
 CTEMP 25.8 c  
 SLVNT CDCL3  
 EXREF 77.00 ppm  
 BF 0.12 Hz  
 RGAIN 54

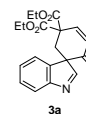

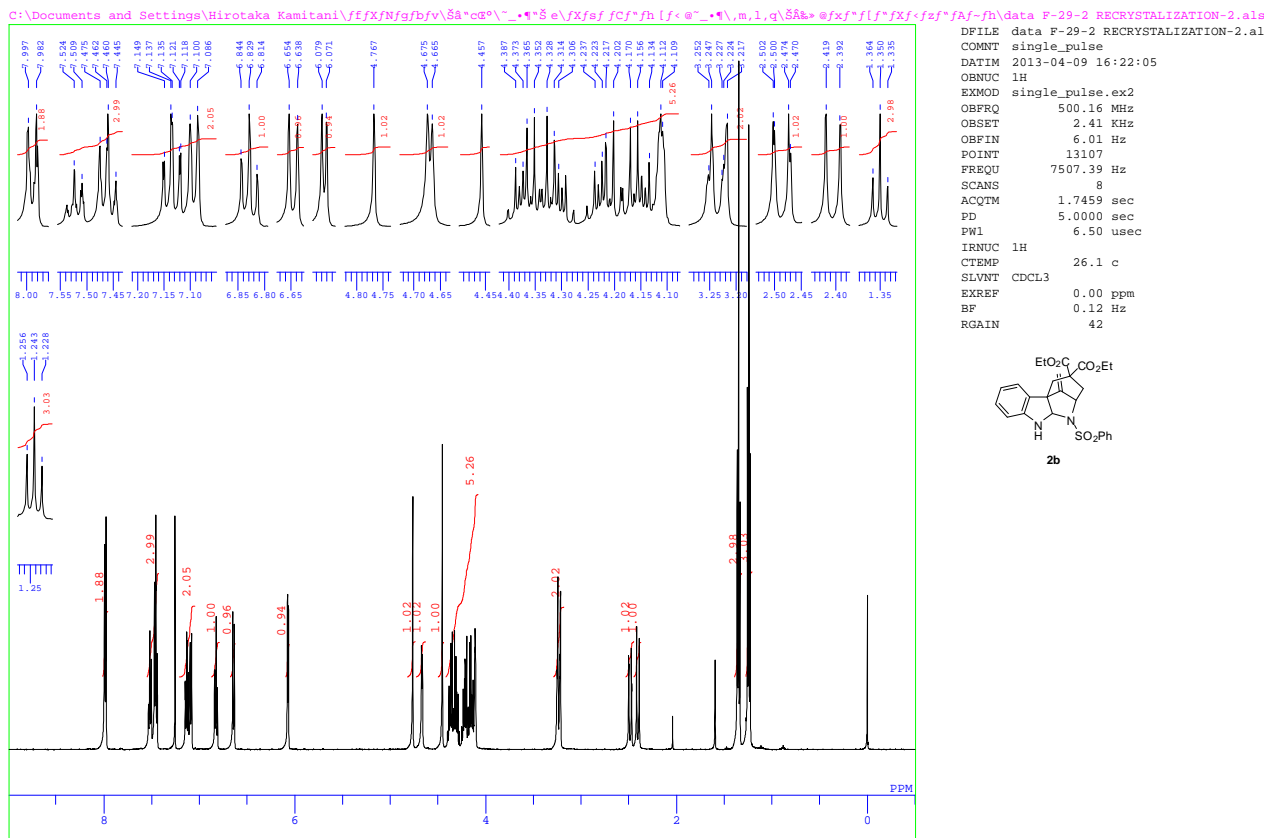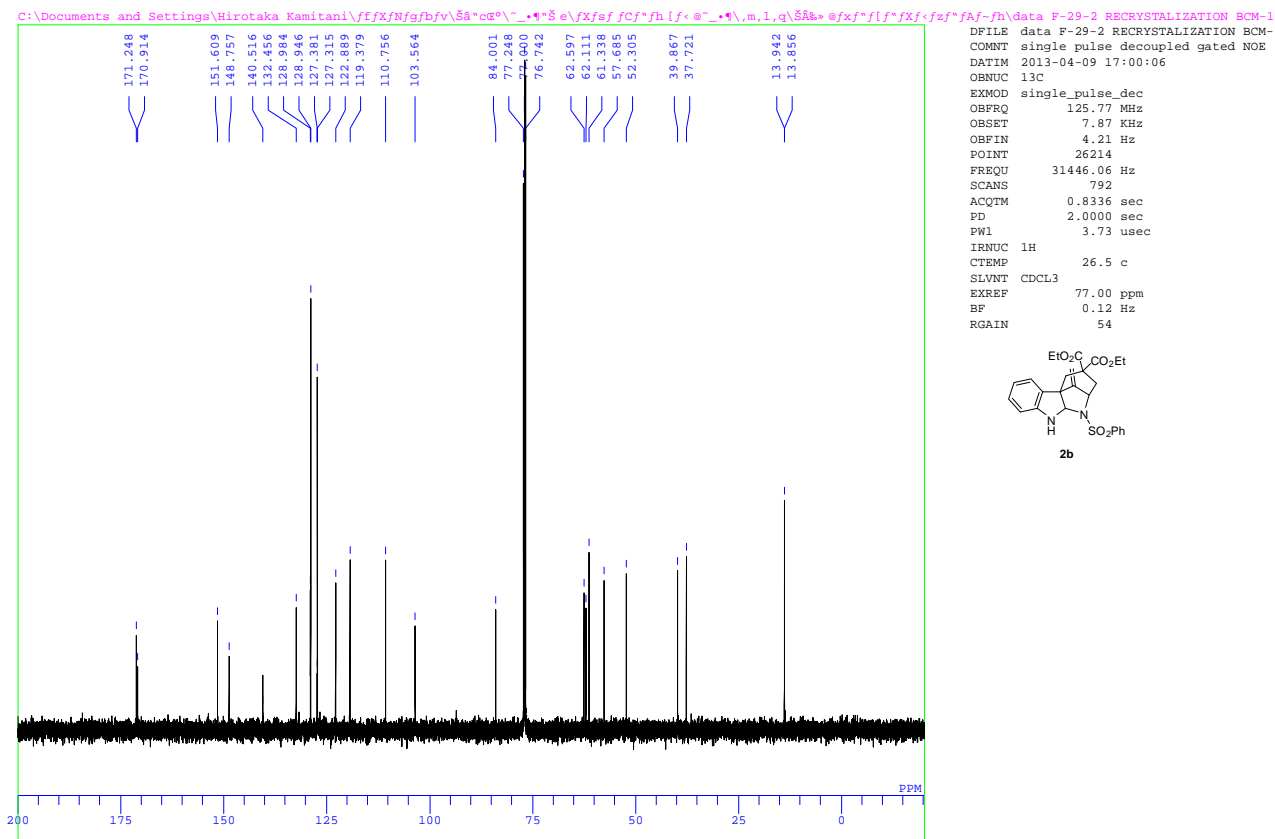

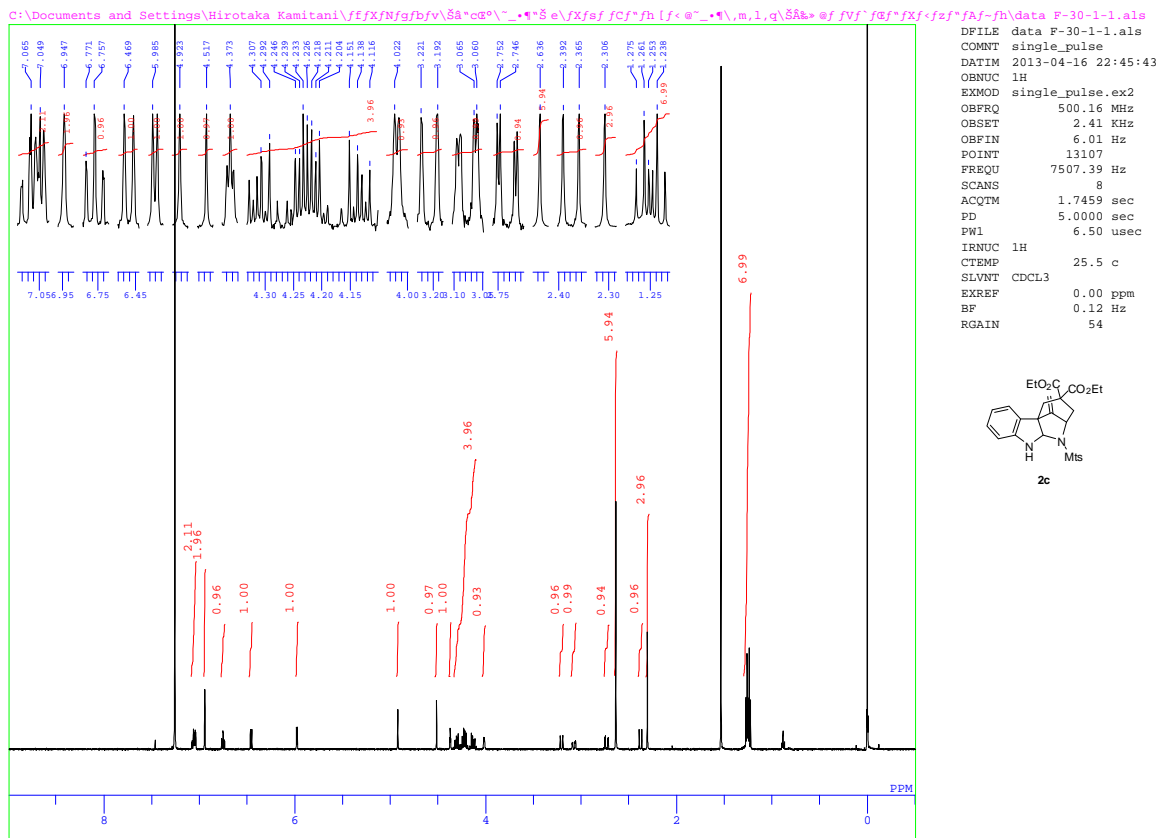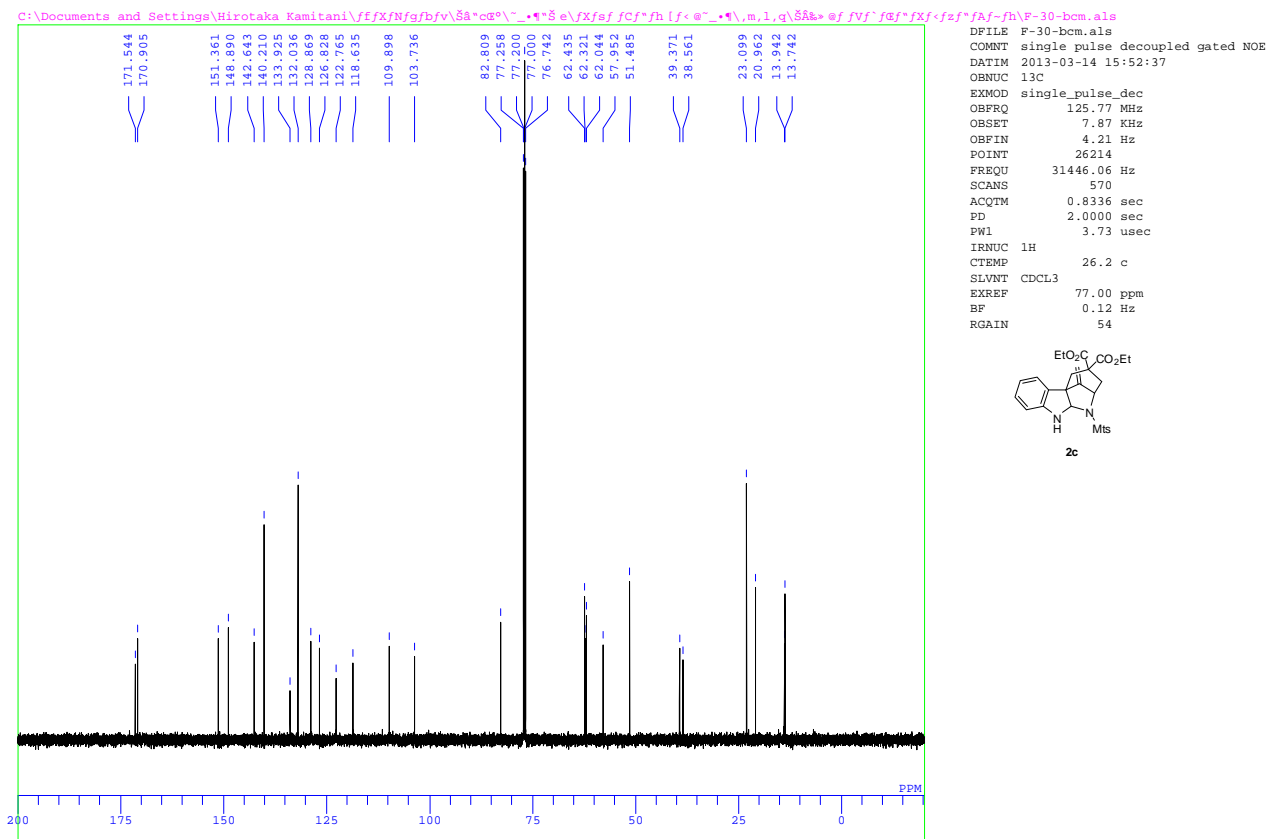

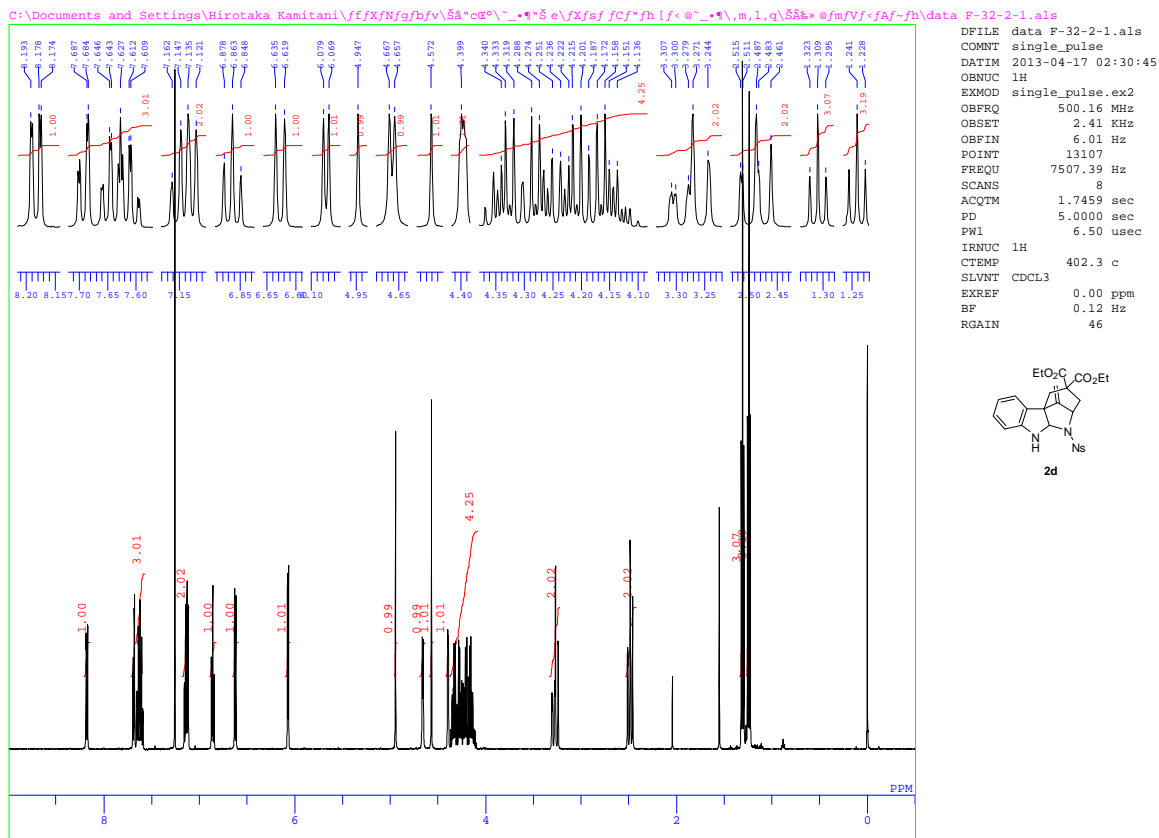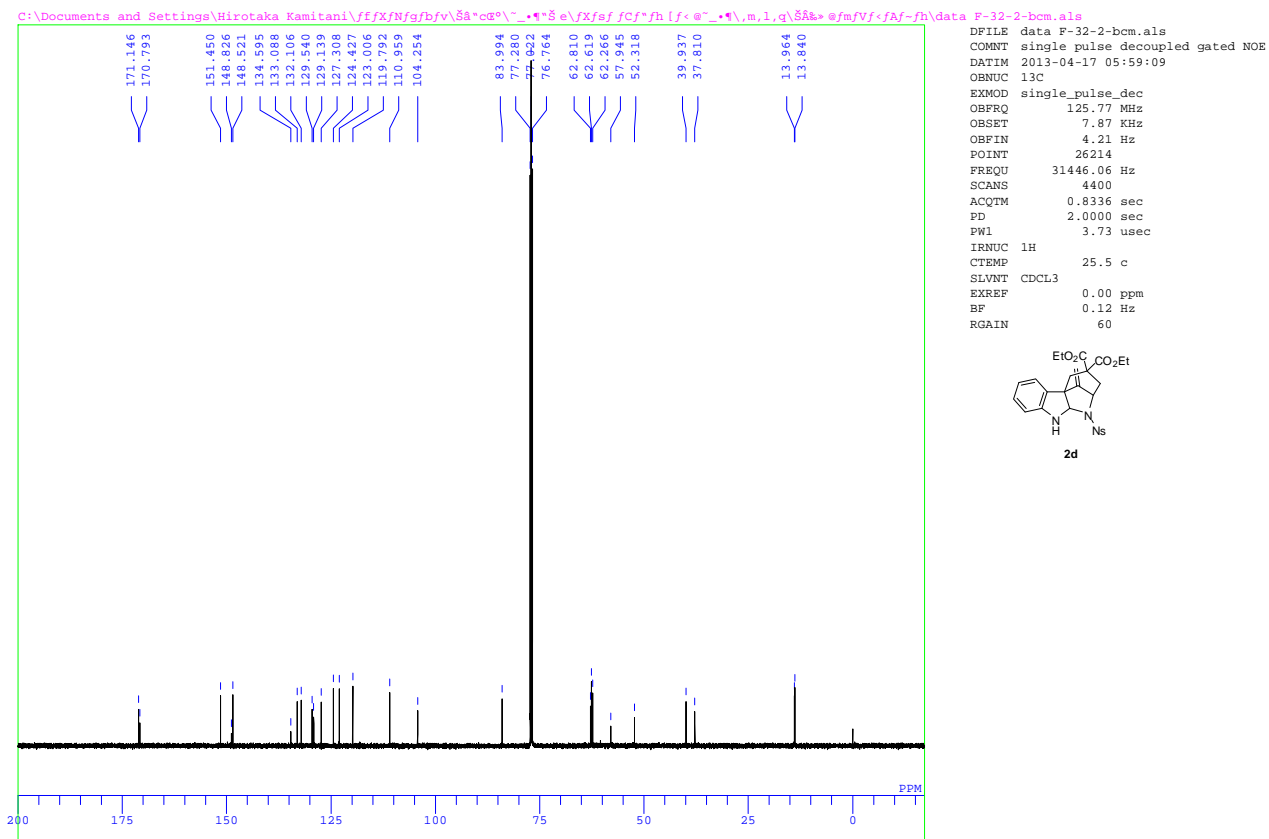

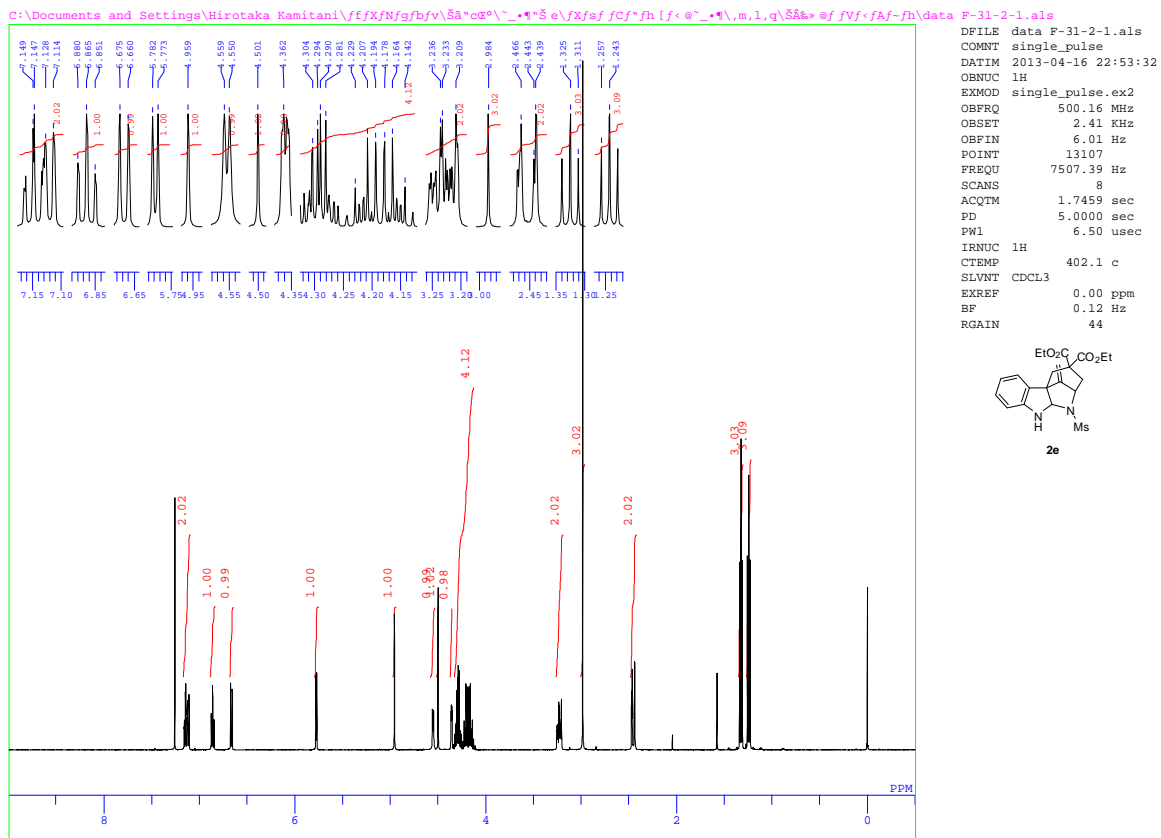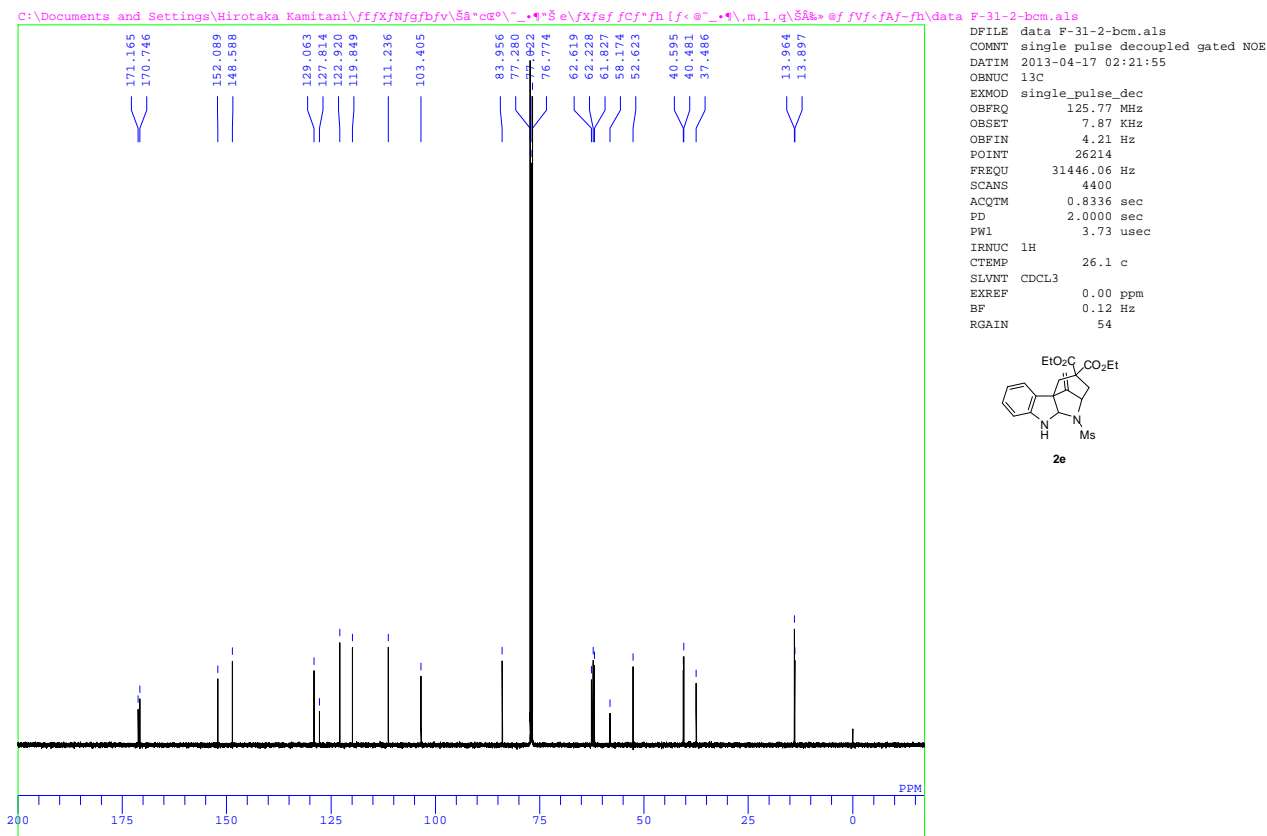

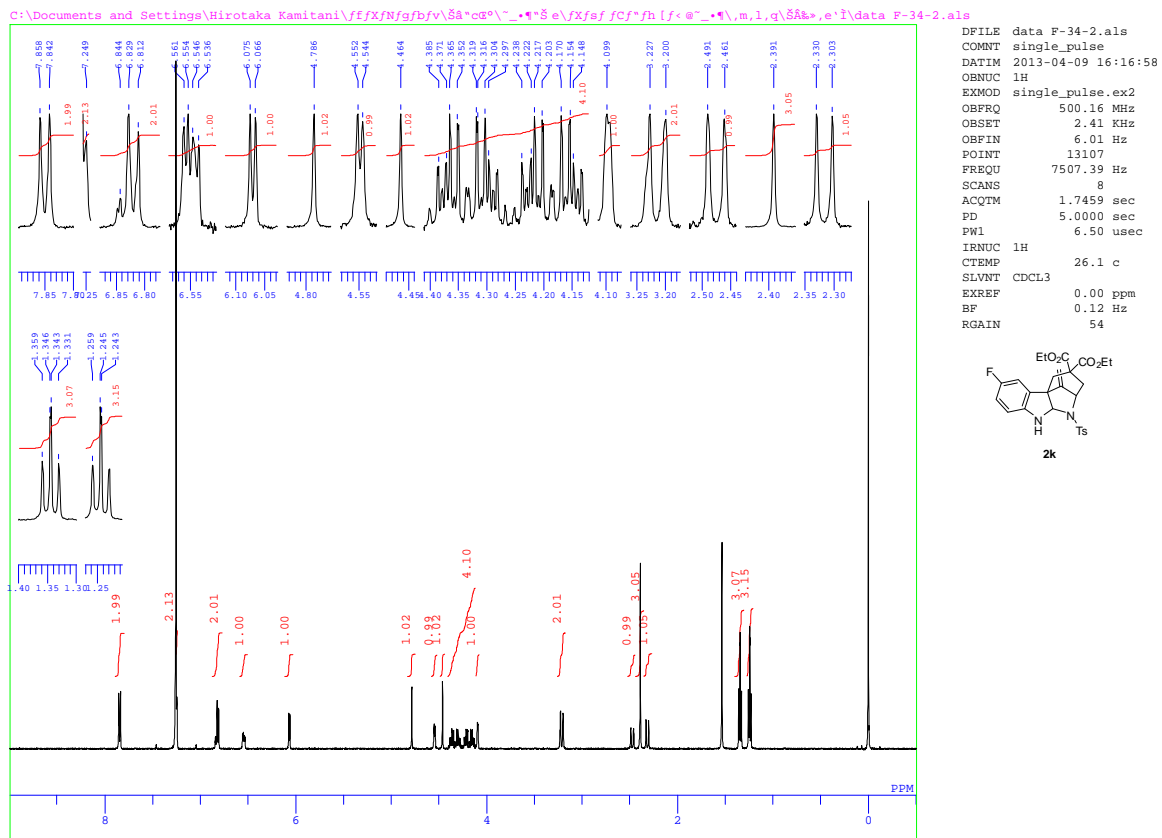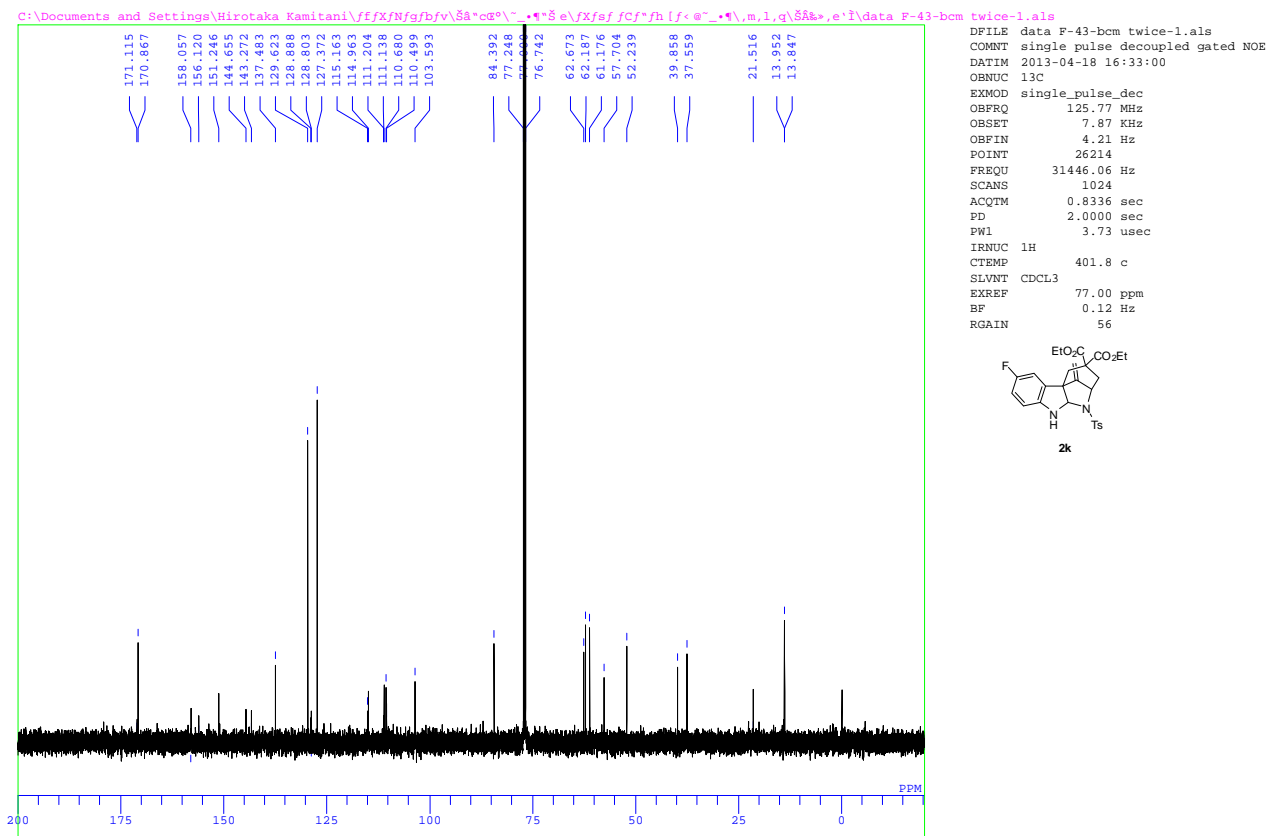

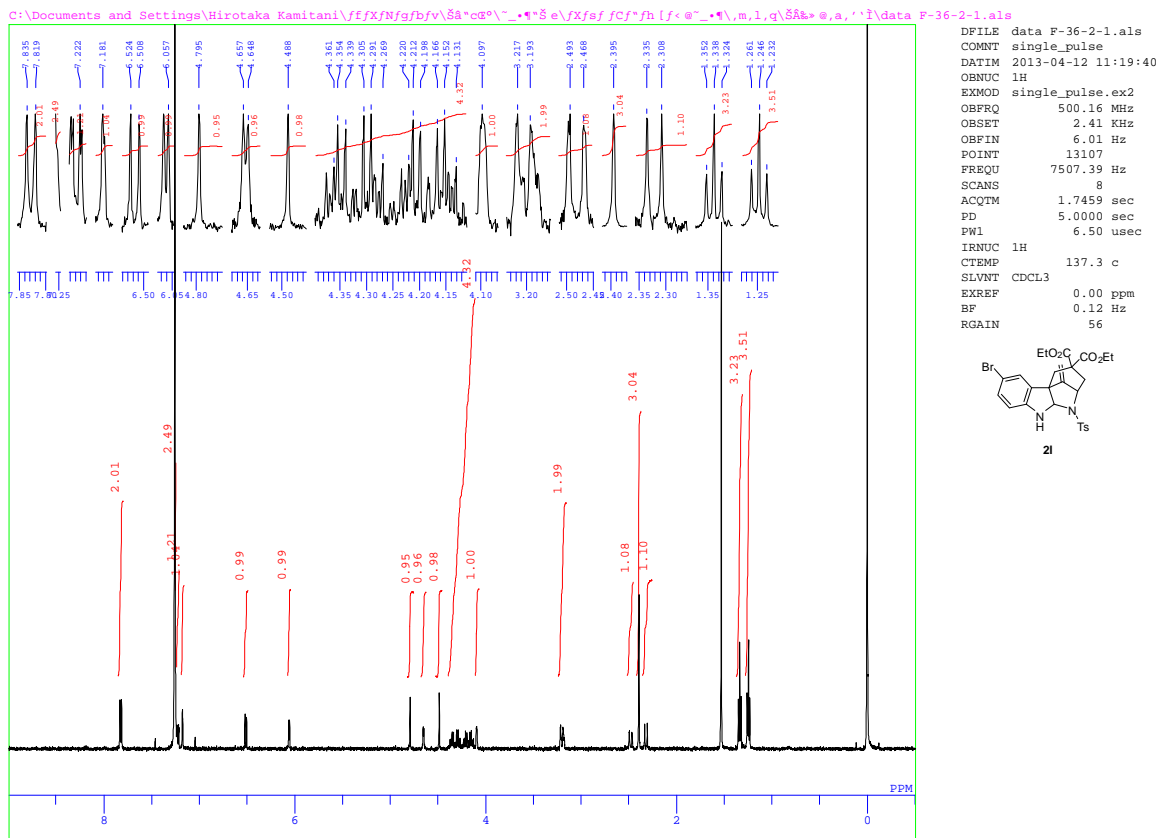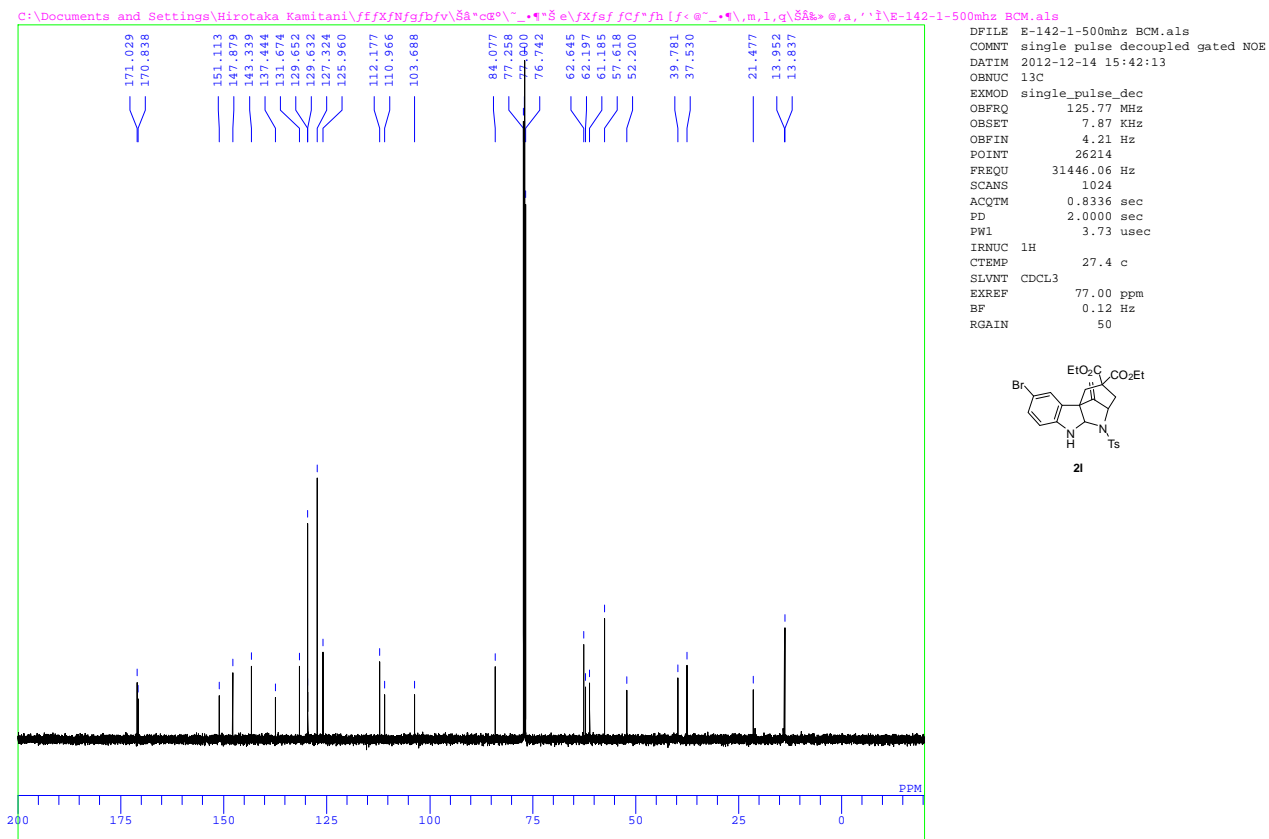



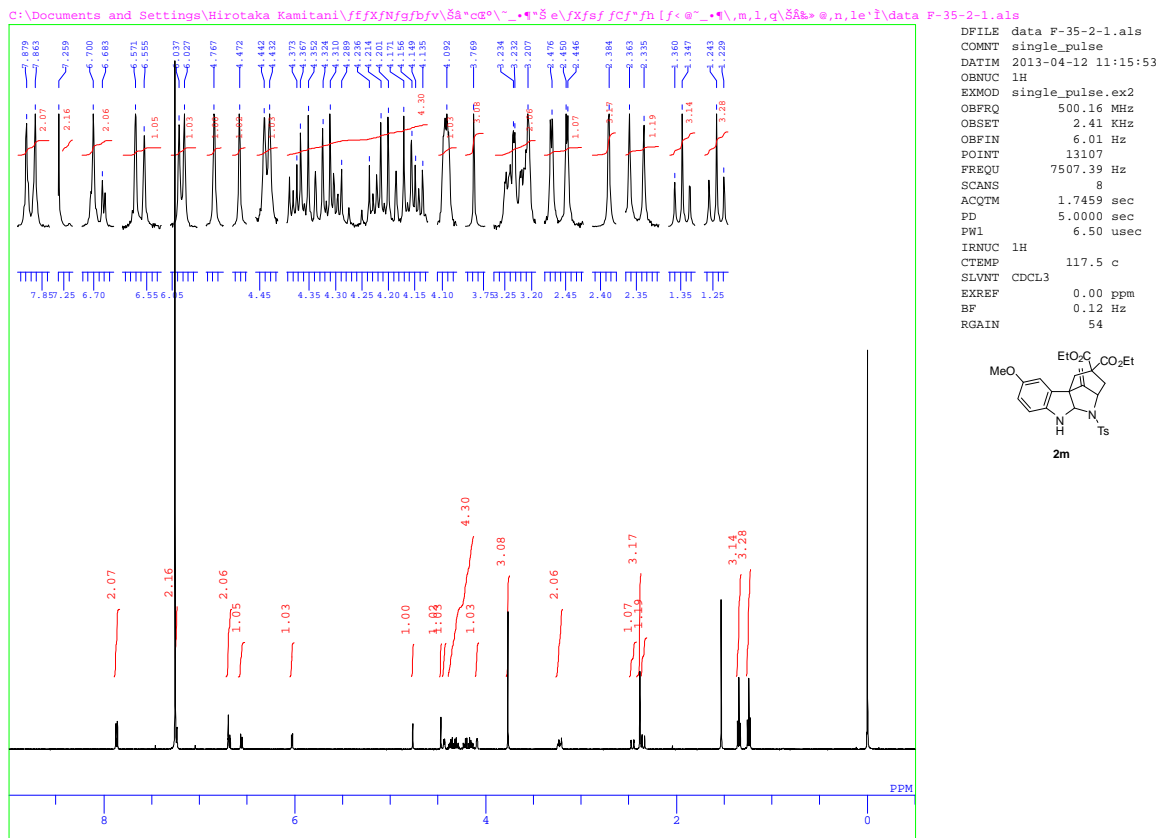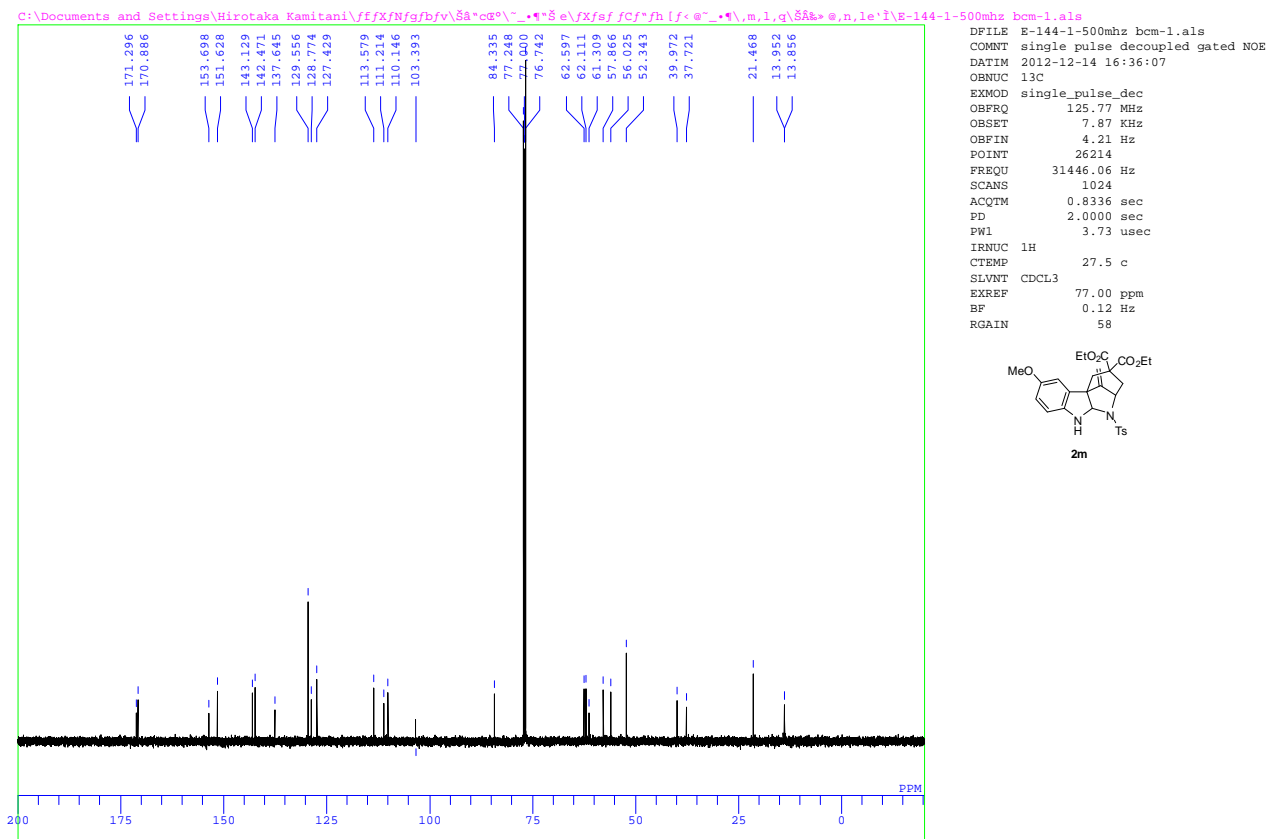

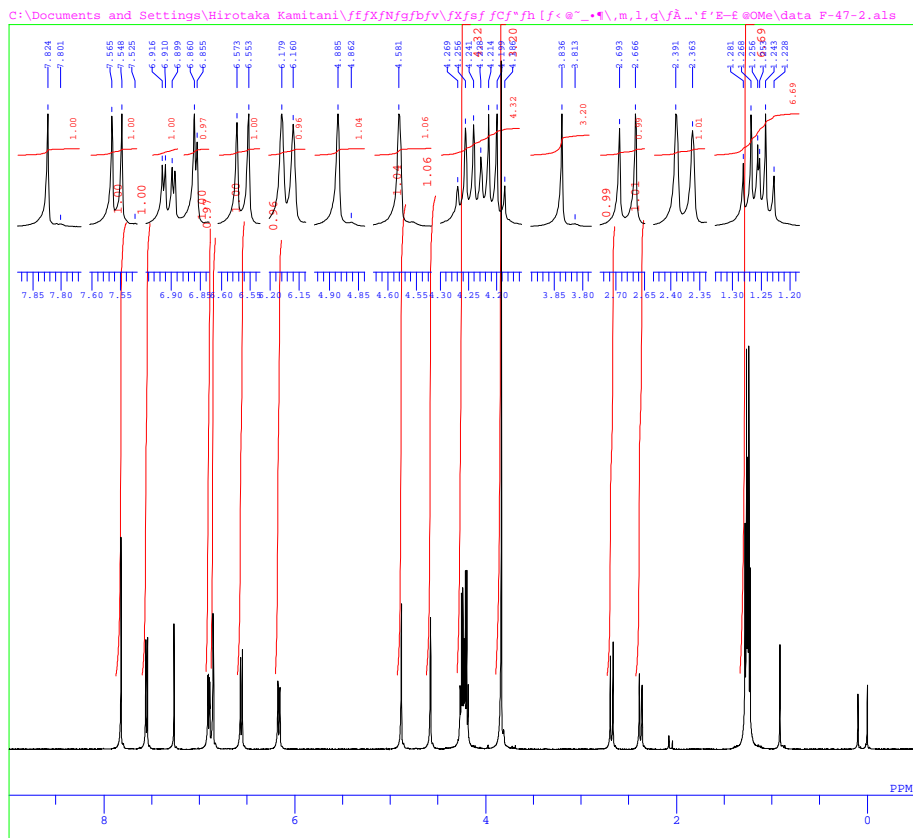

DFILE data F-47-2.als  
COMNT single\_pulse  
DATIM 2013-04-20 14:35:47  
OBNUC 1H  
EXMOD single\_pulse.ex2  
OBFRQ 500.16 MHz  
OBSET 2.41 KHz  
OBFIN 6.01 Hz  
POINT 13107  
FREQU 7507.39 Hz  
SCANS 8  
ACQTM 1.7459 sec  
PD 5.0000 sec  
PWL 6.50 usec  
IRNUC 1H  
CTEMP 25.6 c  
SLVNT CDCL3  
EXREF 0.00 ppm  
BF 0.12 Hz  
RGAIN 42

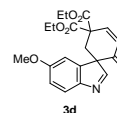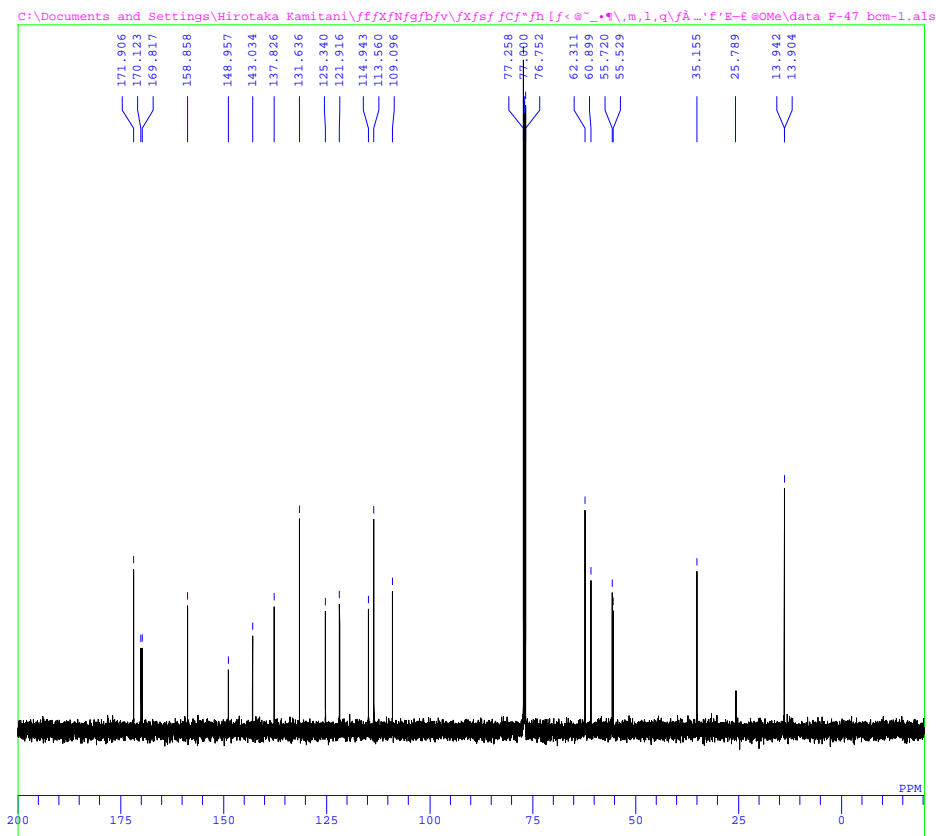

DFILE data F-47-bcm-1.als  
COMNT single\_pulse decoupled gated NOE  
DATIM 2013-04-20 14:32:47  
OBNUC 13C  
EXMOD single\_pulse\_dec  
OBFRQ 125.77 MHz  
OBSET 7.87 KHz  
OBFIN 4.21 Hz  
POINT 26214  
FREQU 31446.06 Hz  
SCANS 964  
ACQTM 0.8336 sec  
PD 2.0000 sec  
PWL 3.73 usec  
IRNUC 1H  
CTEMP 25.4 c  
SLVNT CDCL3  
EXREF 77.00 ppm  
BF 0.12 Hz  
RGAIN 54

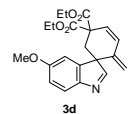

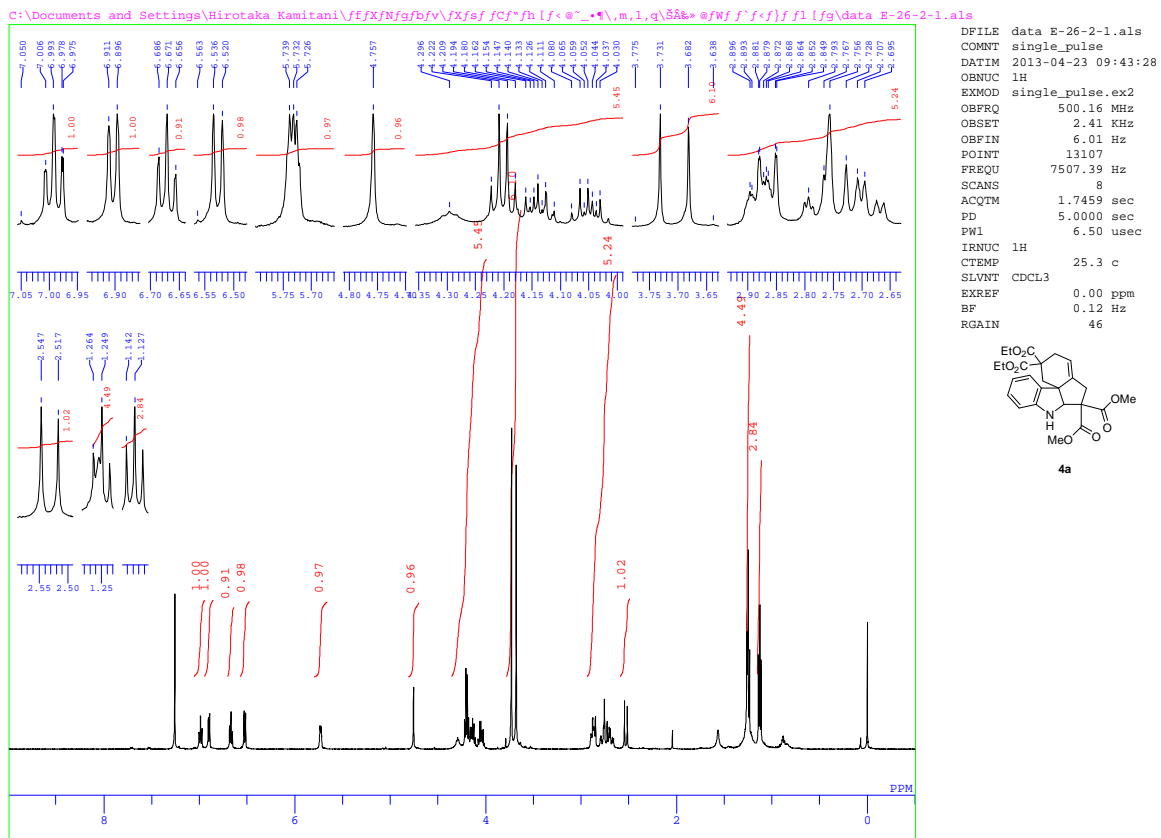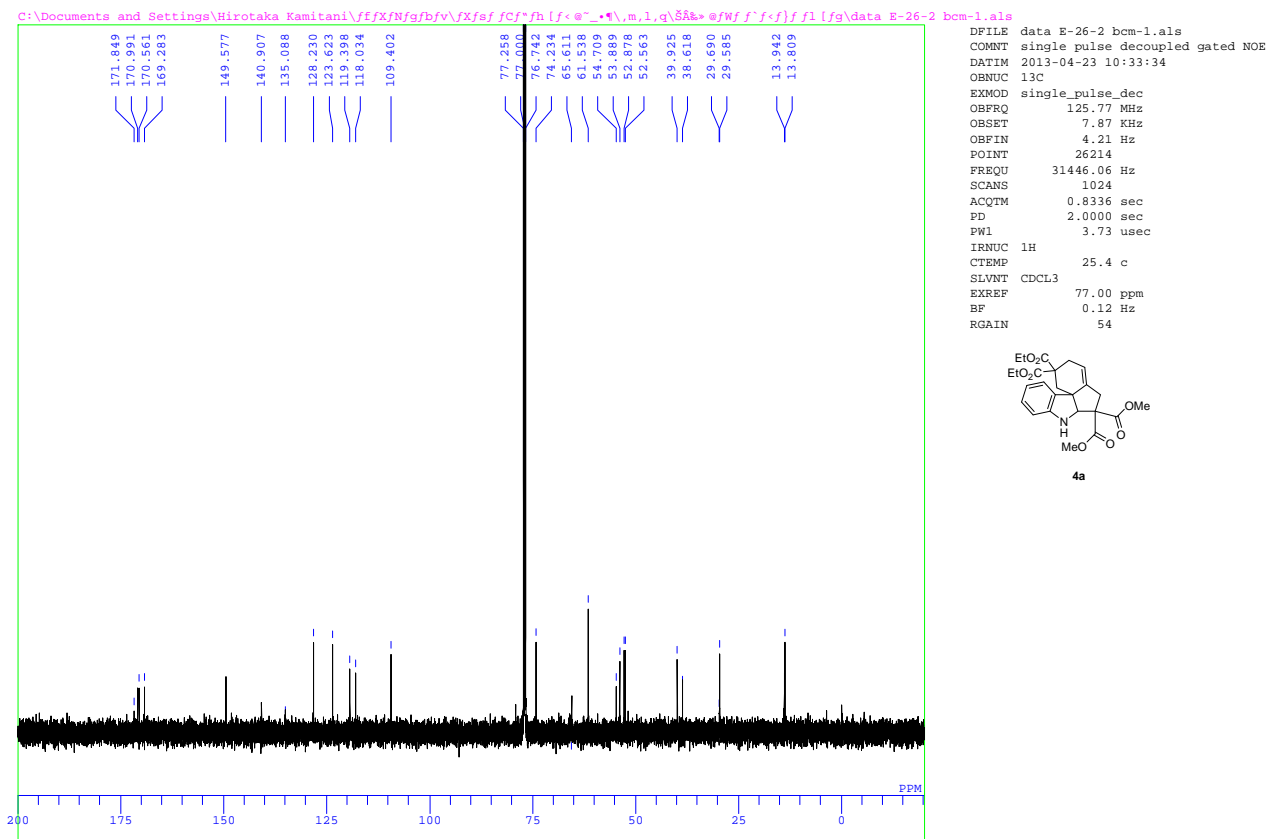

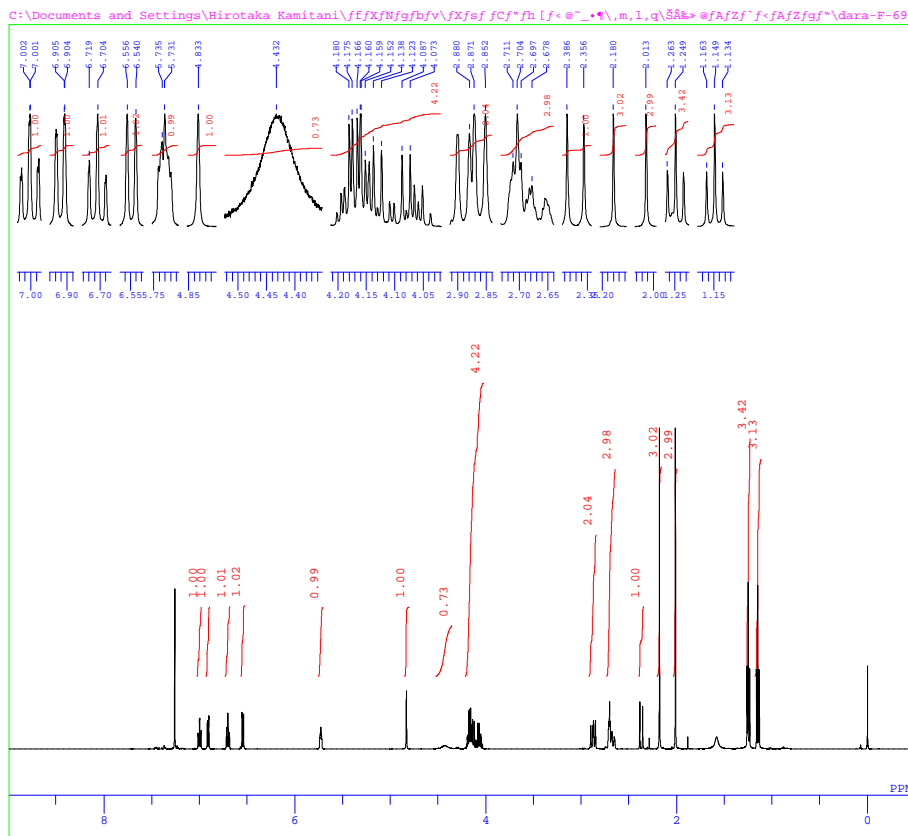

DFILE dara-F-69-sai-2-1.als  
 COMNT single\_pulse  
 DATIM 2013-06-26 10:00:38  
 OBNUC 1H  
 EXMOD single\_pulse.ex2  
 OBFRO 500.16 MHz  
 OBSET 2.41 KHz  
 OBFIN 6.01 Hz  
 POINT 6556  
 FREQU 9384.38 Hz  
 SCANS 8  
 ACQTM 6.9835 sec  
 PD 5.0000 sec  
 PW1 6.50 usec  
 IRNUC 1H  
 CTEMP 26.4 c  
 SLVNT CDCL3  
 EXREF 0.00 ppm  
 BF 0.12 Hz  
 RGAIN 46

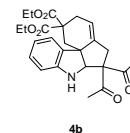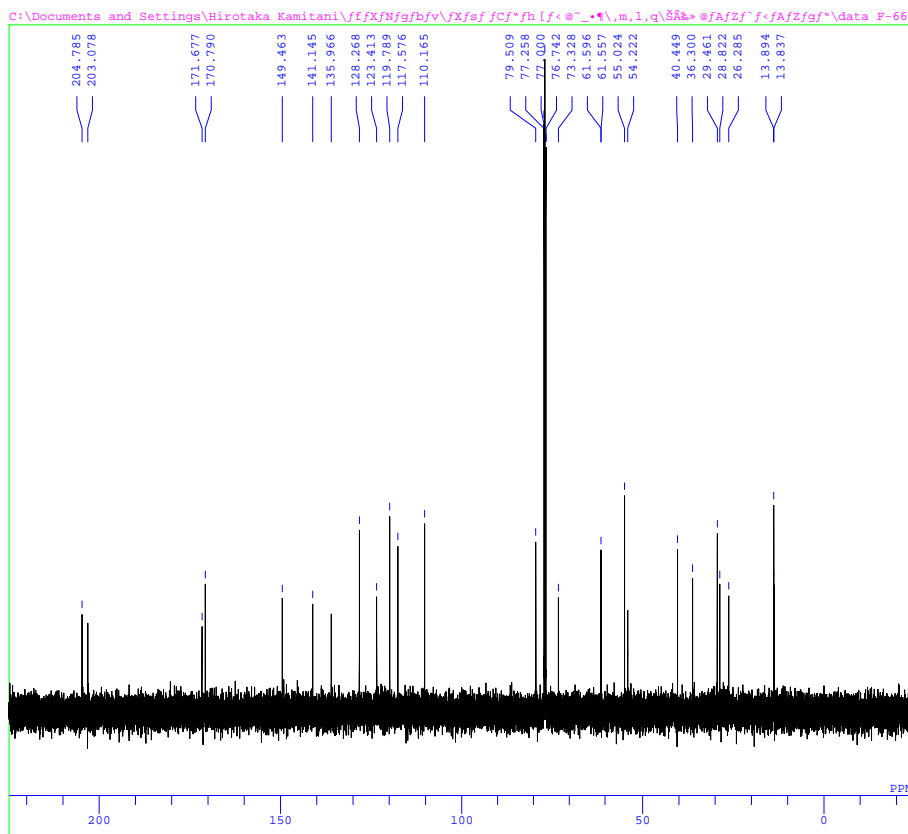

DFILE data-F-66-2 bcm\_copy-1.als  
 COMNT single\_pulse decoupled gated NOE  
 DATIM 2013-05-22 16:19:03  
 OBNUC 13C  
 EXMOD single\_pulse\_dec  
 OBFRO 125.77 MHz  
 OBSET 7.87 KHz  
 OBFIN 4.21 Hz  
 POINT 26214  
 FREQU 31446.06 Hz  
 SCANS 92  
 ACQTM 0.8336 sec  
 PD 2.0000 sec  
 PW1 3.73 usec  
 IRNUC 1H  
 CTEMP 25.3 c  
 SLVNT CDCL3  
 EXREF 77.00 ppm  
 BF 0.12 Hz  
 RGAIN 50

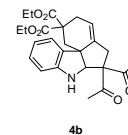

Supplement: c3cc46511j.pdf [file c3cc46511j.pdf]
